# Supplementary material for: Meta-analysis of transcriptomic responses to biotic and abiotic stress in tomato
Source: PeerJ. 2018 Jul 17;6:e4631. doi: 10.7717/peerj.4631 (PMC6054068; doi:10.7717/peerj.4631)
Supplement: Supplemental Information 1 — Raw data and more analysis of data. [file peerj-06-4631-s001.xlsx]

## Sheet: read me
Supplementary Material:
Data 1 - Experimental conditions of microarray raw data used for meta-analysis.
Data 2 - Genes described as related to Transcription factor.
Supplementary Tables:
Table S1 - Abiotic samples combined meta-analysis (by Fisher).
Table S2 - Abiotic samples combined meta-analysis (by maxP).
Table S3 - Biotic samples combined meta-analysis (by Fisher).
Table S4 - Biotic samples combined meta-analysis (by maxP).
Table S5- ID of 361 DEG common in "Biotic" and "Abiotc".
Table S6- Frequency of significant GO terms of DEGs shared by both AS and BS.
Table S7-the DEGs shared by both AS and BS represented various classes of proteins and are participated in many different processes from network analysis
Table S8- Transcription factor detected in biotic stresses.
Table S9- Transcription factor detected in abiotic stresses.
Table S10- Frequency of significant GO terms of DEGs shared by BS.
Table S11- Frequency of significant GO terms of DEGs shared by AS.

## Sheet: Data 1
Data 1 -Experimental conditions of microarray raw data used for meta-analysis.
Accession	Title	Assays	Type
E-GEOD-71428	Microarray Expression profiling of susceptible (CO-3) and resistant (EC-520061) genotype of tomato in response to Early Blight pathogen after 24hrs of inoculation	12	transcription profiling by array
E-GEOD-58521	Expression data from seedligs of wild type tomato seedlings (control) and InsP 5-ptase tansgenic line (L7) exposed to light stress	4	transcription profiling by array
E-GEOD-68641	35S:AtHMA4 and wild-type tomato plants grown in the presence of Zn	24	transcription profiling by array
E-GEOD-68640	Expression data from leaf tissues of 35S:AtHMA4 and wild-type tomato plants grown in the presence of Zn	12	transcription profiling by array
E-GEOD-68639	Expression data from root tissues of 35S:AtHMA4 and wild-type tomato plants grown in the presence of Zn	12	transcription profiling by array
E-MTAB-2898	Transcriptomic analysis of MeJA-induced plant defense responses in young MM and BC5S2 plants	12	transcription profiling by array
E-GEOD-61076	Whole genome tomato transcriptional response to Tetranychus urticae herbivory	33	transcription profiling by array
E-MEXP-2389	Transcription profiling of tomato infected with mild and aggressive Pepino mosaic virus to investigate differential host responses	36	transcription profiling by array
E-GEOD-61075	Whole genome tomato transcriptional response to jasmonic acid treatment and Tetranychus urticae herbivory	12	transcription profiling by array
E-GEOD-39894	Comparative transcriptome analysis of responses to water deficit in Solanum lycopersicum and S. pimpinellifolium roots	46	transcription profiling by array
E-GEOD-43492	The effects of a novel agrochemical in alleviating salinity stress	12	transcription profiling by array
E-GEOD-31807	Expression data from Ralstonia solanacearum-inoculated tomato stem	12	transcription profiling by array
E-GEOD-30048	Down-regulation of gene expression is a conserved and distinctive feature required for early development of nematode-induced Giant Cells in tomato	20	transcription profiling by array
E-GEOD-35020	Microarray analysis of gene expression under different light conditions	20	transcription profiling by array
E-GEOD-31112	Transcriptional characterization of tomato roots response to iron deficiency	6	transcription profiling by array
E-GEOD-33177	Microarray analysis of gene expression induced by Phytophthora infestans in tomato leaves	7	transcription profiling by array
E-GEOD-21999	Tomato fruit wound inoculation by C. coccodes and ammonium treated	8	transcription profiling by array
E-GEOD-22803	Expression data from roots and first two leaves of tomato seedlings growing on regular MS medium or MS medium supplemented with multi-wall carbon nanotubes (0, 50, 100, 200 ug/ml) or activated carbon (50 mg/ml)	20	transcription profiling by array
E-MEXP-2356	Transcription profiling of Lycopersicon esculentum roots in wild-type and ABA-deficient, control and Glomus intraradices inoculated plants to characterise variations in mycorrhization	20	transcription profiling by array
E-GEOD-22304	Expression data in response to abiotic stresses in tomato at flowering stage(drought and heat)	24	transcription profiling by array
E-GEOD-16401	tomato salt response	12	transcription profiling by array
E-GEOD-21020	Tomato root transcriptome response to a nitrogen-enriched soil patch	9	transcription profiling by array
E-GEOD-14637	Transcription profiling of tomato fruit responses to Botrytis cinerea	18	transcription profiling by array

## Sheet: Data 2
Data 2 - Genes described as related to Transcription factor
TF_ID	Gene_ID	Family
Solyc04g007000.1.1	Solyc04g007000.1	RAV
Solyc05g009790.1.1	Solyc05g009790.1	RAV
Solyc03g083110.1.1	Solyc03g083110.1	RAV
Solyc00g012700.1.1	Solyc00g012700.1	FAR1
Solyc00g024680.1.1	Solyc00g024680.1	Dof
Solyc00g050430.2.1	Solyc00g050430.2	bHLH
Solyc00g084870.2.1	Solyc00g084870.2	TCP
Solyc00g107050.1.1	Solyc00g107050.1	NF-YC
Solyc00g117450.2.1	Solyc00g117450.2	SRS
Solyc00g154980.1.1	Solyc00g154980.1	EIL
Solyc00g217560.1.1	Solyc00g217560.1	TCP
Solyc00g255510.1.1	Solyc00g255510.1	NAC
Solyc00g270510.1.1	Solyc00g270510.1	NF-YB
Solyc01g006650.1.1	Solyc01g006650.1	EIL
Solyc01g006930.2.1	Solyc01g006930.2	NF-YA
Solyc01g007760.2.1	Solyc01g007760.2	E2F/DP
Solyc01g008230.2.1	Solyc01g008230.2	TCP
Solyc01g008490.2.1	Solyc01g008490.2	NF-YA
Solyc01g008730.2.1	Solyc01g008730.2	bZIP
Solyc01g008910.2.1	Solyc01g008910.2	GRAS
Solyc01g008980.2.1	Solyc01g008980.2	bZIP
Solyc01g009170.2.1	Solyc01g009170.2	EIL
Solyc01g009510.1.1	Solyc01g009510.1	bZIP
Solyc01g009840.1.1	Solyc01g009840.1	GRAS
Solyc01g009860.2.1	Solyc01g009860.2	NAC
Solyc01g010130.2.1	Solyc01g010130.2	bHLH
Solyc01g010240.2.1	Solyc01g010240.2	YABBY
Solyc01g014480.2.1	Solyc01g014480.2	EIL
Solyc01g014910.1.1	Solyc01g014910.1	bHLH
Solyc01g014960.1.1	Solyc01g014960.1	bHLH
Solyc01g014970.1.1	Solyc01g014970.1	ZF-HD
Solyc01g020170.1.1	Solyc01g020170.1	bHLH
Solyc01g021730.2.1	Solyc01g021730.2	NAC
Solyc01g044520.1.1	Solyc01g044520.1	LBD
Solyc01g057270.2.1	Solyc01g057270.2	CAMTA
Solyc01g057300.1.1	Solyc01g057300.1	bHLH
Solyc01g058540.2.1	Solyc01g058540.2	WRKY
Solyc01g059950.1.1	Solyc01g059950.1	GRAS
Solyc01g059960.1.1	Solyc01g059960.1	GRAS
Solyc01g060170.2.1	Solyc01g060170.2	CAMTA
Solyc01g060490.2.1	Solyc01g060490.2	GATA
Solyc01g065890.1.1	Solyc01g065890.1	Trihelix
Solyc01g065900.1.1	Solyc01g065900.1	Trihelix
Solyc01g067130.2.1	Solyc01g067130.2	NF-YB
Solyc01g067340.1.1	Solyc01g067340.1	bHLH
Solyc01g068100.2.1	Solyc01g068100.2	SBP
Solyc01g079260.2.1	Solyc01g079260.2	WRKY
Solyc01g079360.2.1	Solyc01g079360.2	WRKY
Solyc01g079370.2.1	Solyc01g079370.2	GRAS
Solyc01g079380.1.1	Solyc01g079380.1	GRAS
Solyc01g079480.2.1	Solyc01g079480.2	bZIP
Solyc01g079870.2.1	Solyc01g079870.2	NF-YC
Solyc01g080050.2.1	Solyc01g080050.2	bHLH
Solyc01g080670.2.1	Solyc01g080670.2	SBP
Solyc01g081090.1.1	Solyc01g081090.1	bHLH
Solyc01g081100.1.1	Solyc01g081100.1	bHLH
Solyc01g086870.2.1	Solyc01g086870.2	bHLH
Solyc01g087240.2.1	Solyc01g087240.2	NF-YA
Solyc01g088820.2.1	Solyc01g088820.2	Trihelix
Solyc01g089960.2.1	Solyc01g089960.2	WRKY
Solyc01g090730.2.1	Solyc01g090730.2	SBP
Solyc01g090760.2.1	Solyc01g090760.2	GATA
Solyc01g090790.2.1	Solyc01g090790.2	bHLH
Solyc01g090950.2.1	Solyc01g090950.2	GRAS
Solyc01g091010.2.1	Solyc01g091010.2	YABBY
Solyc01g091400.2.1	Solyc01g091400.2	LBD
Solyc01g091420.1.1	Solyc01g091420.1	LBD
Solyc01g094490.2.1	Solyc01g094490.2	NAC
Solyc01g094580.2.1	Solyc01g094580.2	BES1
Solyc01g095100.2.1	Solyc01g095100.2	WRKY
Solyc01g095460.2.1	Solyc01g095460.2	bZIP
Solyc01g095630.2.1	Solyc01g095630.2	WRKY
Solyc01g096050.2.1	Solyc01g096050.2	bHLH
Solyc01g096120.2.1	Solyc01g096120.2	Dof
Solyc01g096370.2.1	Solyc01g096370.2	bHLH
Solyc01g096470.2.1	Solyc01g096470.2	Trihelix
Solyc01g096710.2.1	Solyc01g096710.2	NF-YC
Solyc01g096810.2.1	Solyc01g096810.2	EIL
Solyc01g096850.2.1	Solyc01g096850.2	FAR1
Solyc01g097330.2.1	Solyc01g097330.2	bZIP
Solyc01g097890.2.1	Solyc01g097890.2	GeBP
Solyc01g098220.1.1	Solyc01g098220.1	LBD
Solyc01g098720.2.1	Solyc01g098720.2	bHLH
Solyc01g099320.2.1	Solyc01g099320.2	NF-YB
Solyc01g100200.2.1	Solyc01g100200.2	GRAS
Solyc01g100220.2.1	Solyc01g100220.2	GATA
Solyc01g100460.2.1	Solyc01g100460.2	bZIP
Solyc01g102300.2.1	Solyc01g102300.2	bHLH
Solyc01g102740.2.1	Solyc01g102740.2	NAC
Solyc01g102980.2.1	Solyc01g102980.2	ZF-HD
Solyc01g103180.2.1	Solyc01g103180.2	FAR1
Solyc01g103780.2.1	Solyc01g103780.2	TCP
Solyc01g103810.1.1	Solyc01g103810.1	ZF-HD
Solyc01g103820.1.1	Solyc01g103820.1	ZF-HD
Solyc01g103830.1.1	Solyc01g103830.1	ZF-HD
Solyc01g103840.1.1	Solyc01g103840.1	ZF-HD
Solyc01g104550.2.1	Solyc01g104550.2	WRKY
Solyc01g104650.2.1	Solyc01g104650.2	bZIP
Solyc01g104760.2.1	Solyc01g104760.2	Trihelix
Solyc01g104900.2.1	Solyc01g104900.2	NAC
Solyc01g105230.2.1	Solyc01g105230.2	CAMTA
Solyc01g106030.2.1	Solyc01g106030.2	GATA
Solyc01g106040.2.1	Solyc01g106040.2	GATA
Solyc01g106460.2.1	Solyc01g106460.2	bHLH
Solyc01g107140.1.1	Solyc01g107140.1	bHLH
Solyc01g107190.2.1	Solyc01g107190.2	LBD
Solyc01g107950.1.1	Solyc01g107950.1	bHLH
Solyc01g107960.2.1	Solyc01g107960.2	bHLH
Solyc01g107970.1.1	Solyc01g107970.1	bHLH
Solyc01g108080.2.1	Solyc01g108080.2	bZIP
Solyc01g109240.1.1	Solyc01g109240.1	LBD
Solyc01g109700.2.1	Solyc01g109700.2	bHLH
Solyc01g109880.2.1	Solyc01g109880.2	bZIP
Solyc01g110140.2.1	Solyc01g110140.2	SRS
Solyc01g110310.2.1	Solyc01g110310.2	GATA
Solyc01g110470.2.1	Solyc01g110470.2	BBR-BPC
Solyc01g110480.2.1	Solyc01g110480.2	bZIP
Solyc01g111130.2.1	Solyc01g111130.2	bHLH
Solyc01g111580.2.1	Solyc01g111580.2	bZIP
Solyc01g112190.2.1	Solyc01g112190.2	Nin-like
Solyc01g112320.2.1	Solyc01g112320.2	FAR1
Solyc02g005290.2.1	Solyc02g005290.2	GeBP
Solyc02g014740.1.1	Solyc02g014740.1	GeBP
Solyc02g014750.1.1	Solyc02g014750.1	GeBP
Solyc02g021330.1.1	Solyc02g021330.1	NF-YC
Solyc02g021680.2.1	Solyc02g021680.2	WRKY
Solyc02g030460.2.1	Solyc02g030460.2	Trihelix
Solyc02g032180.1.1	Solyc02g032180.1	NF-YB
Solyc02g032190.1.1	Solyc02g032190.1	NF-YB
Solyc02g032950.2.1	Solyc02g032950.2	WRKY
Solyc02g036430.1.1	Solyc02g036430.1	NAC
Solyc02g061780.2.1	Solyc02g061780.2	NAC
Solyc02g061870.1.1	Solyc02g061870.1	NAC
Solyc02g061900.1.1	Solyc02g061900.1	NAC
Solyc02g061910.1.1	Solyc02g061910.1	NAC
Solyc02g061990.2.1	Solyc02g061990.2	bZIP
Solyc02g062060.1.1	Solyc02g062060.1	NAC
Solyc02g062070.1.1	Solyc02g062070.1	NAC
Solyc02g062090.1.1	Solyc02g062090.1	NAC
Solyc02g062210.1.1	Solyc02g062210.1	NAC
Solyc02g062380.1.1	Solyc02g062380.1	GATA
Solyc02g062400.2.1	Solyc02g062400.2	SRS
Solyc02g062690.2.1	Solyc02g062690.2	bHLH
Solyc02g062760.2.1	Solyc02g062760.2	GATA
Solyc02g062950.2.1	Solyc02g062950.2	bZIP
Solyc02g063010.2.1	Solyc02g063010.2	BES1
Solyc02g063430.2.1	Solyc02g063430.2	bHLH
Solyc02g065150.1.1	Solyc02g065150.1	LBD
Solyc02g065290.1.1	Solyc02g065290.1	Dof
Solyc02g065800.1.1	Solyc02g065800.1	TCP
Solyc02g067230.2.1	Solyc02g067230.2	Dof
Solyc02g067310.2.1	Solyc02g067310.2	ZF-HD
Solyc02g067320.1.1	Solyc02g067320.1	ZF-HD
Solyc02g067330.1.1	Solyc02g067330.1	ZF-HD
Solyc02g067380.2.1	Solyc02g067380.2	bHLH
Solyc02g067430.2.1	Solyc02g067430.2	WRKY
Solyc02g067800.2.1	Solyc02g067800.2	LBD
Solyc02g068200.1.1	Solyc02g068200.1	TCP
Solyc02g068550.1.1	Solyc02g068550.1	FAR1
Solyc02g069390.1.1	Solyc02g069390.1	Trihelix
Solyc02g069440.2.1	Solyc02g069440.2	LBD
Solyc02g069860.2.1	Solyc02g069860.2	NF-YA
Solyc02g069960.2.1	Solyc02g069960.2	NAC
Solyc02g070140.1.1	Solyc02g070140.1	NAC
Solyc02g070880.1.1	Solyc02g070880.1	bHLH
Solyc02g071130.2.1	Solyc02g071130.2	WRKY
Solyc02g071990.2.1	Solyc02g071990.2	BES1
Solyc02g072000.2.1	Solyc02g072000.2	HSF
Solyc02g072060.1.1	Solyc02g072060.1	HSF
Solyc02g072190.2.1	Solyc02g072190.2	WRKY
Solyc02g076810.2.1	Solyc02g076810.2	Trihelix
Solyc02g076850.1.1	Solyc02g076850.1	Dof
Solyc02g076920.2.1	Solyc02g076920.2	bHLH
Solyc02g077250.2.1	Solyc02g077250.2	TCP
Solyc02g077380.1.1	Solyc02g077380.1	LBD
Solyc02g077450.2.1	Solyc02g077450.2	VOZ
Solyc02g077610.2.1	Solyc02g077610.2	NAC
Solyc02g077920.2.1	Solyc02g077920.2	SBP
Solyc02g077950.1.1	Solyc02g077950.1	Dof
Solyc02g077960.1.1	Solyc02g077960.1	Dof
Solyc02g078130.2.1	Solyc02g078130.2	bHLH
Solyc02g078340.2.1	Solyc02g078340.2	HSF
Solyc02g078620.1.1	Solyc02g078620.1	Dof
Solyc02g079180.1.1	Solyc02g079180.1	HSF
Solyc02g079760.2.1	Solyc02g079760.2	bHLH
Solyc02g079810.1.1	Solyc02g079810.1	bHLH
Solyc02g079970.2.1	Solyc02g079970.2	bHLH
Solyc02g080890.2.1	Solyc02g080890.2	WRKY
Solyc02g081270.2.1	Solyc02g081270.2	NAC
Solyc02g083520.2.1	Solyc02g083520.2	bZIP
Solyc02g083750.1.1	Solyc02g083750.1	GeBP
Solyc02g084230.1.1	Solyc02g084230.1	BBR-BPC
Solyc02g084350.2.1	Solyc02g084350.2	NAC
Solyc02g084590.2.1	Solyc02g084590.2	GATA
Solyc02g084680.2.1	Solyc02g084680.2	SRS
Solyc02g084860.1.1	Solyc02g084860.1	bZIP
Solyc02g084880.2.1	Solyc02g084880.2	bHLH
Solyc02g085160.1.1	Solyc02g085160.1	ZF-HD
Solyc02g085190.1.1	Solyc02g085190.1	GATA
Solyc02g085340.1.1	Solyc02g085340.1	GRAS
Solyc02g085600.1.1	Solyc02g085600.1	GRAS
Solyc02g085610.2.1	Solyc02g085610.2	bZIP
Solyc02g085910.2.1	Solyc02g085910.2	LBD
Solyc02g086480.1.1	Solyc02g086480.1	LBD
Solyc02g087310.2.1	Solyc02g087310.2	E2F/DP
Solyc02g087570.1.1	Solyc02g087570.1	LBD
Solyc02g087860.2.1	Solyc02g087860.2	bHLH
Solyc02g087920.2.1	Solyc02g087920.2	NAC
Solyc02g087970.1.1	Solyc02g087970.1	ZF-HD
Solyc02g088070.2.1	Solyc02g088070.2	Dof
Solyc02g088180.2.1	Solyc02g088180.2	NAC
Solyc02g088340.2.1	Solyc02g088340.2	WRKY
Solyc02g089020.1.1	Solyc02g089020.1	TCP
Solyc02g089420.1.1	Solyc02g089420.1	bZIP
Solyc02g089830.1.1	Solyc02g089830.1	TCP
Solyc02g090220.2.1	Solyc02g090220.2	Dof
Solyc02g090310.1.1	Solyc02g090310.1	Dof
Solyc02g090410.2.1	Solyc02g090410.2	LBD
Solyc02g090820.2.1	Solyc02g090820.2	HSF
Solyc02g090950.1.1	Solyc02g090950.1	bHLH
Solyc02g091030.2.1	Solyc02g091030.2	NF-YC
Solyc02g091440.1.1	Solyc02g091440.1	bHLH
Solyc02g091690.2.1	Solyc02g091690.2	bHLH
Solyc02g091800.2.1	Solyc02g091800.2	bHLH
Solyc02g091810.1.1	Solyc02g091810.1	bHLH
Solyc02g091820.1.1	Solyc02g091820.1	bHLH
Solyc02g092090.1.1	Solyc02g092090.1	bZIP
Solyc02g092170.1.1	Solyc02g092170.1	FAR1
Solyc02g092370.1.1	Solyc02g092370.1	GRAS
Solyc02g092550.2.1	Solyc02g092550.2	LBD
Solyc02g092570.1.1	Solyc02g092570.1	GRAS
Solyc02g093050.2.1	Solyc02g093050.2	WRKY
Solyc02g093280.2.1	Solyc02g093280.2	bHLH
Solyc02g093420.2.1	Solyc02g093420.2	NAC
Solyc02g094270.1.1	Solyc02g094270.1	WRKY
Solyc02g094290.1.1	Solyc02g094290.1	TCP
Solyc02g094340.1.1	Solyc02g094340.1	GRAS
Solyc03g005350.2.1	Solyc03g005350.2	bHLH
Solyc03g005990.2.1	Solyc03g005990.2	BES1
Solyc03g006000.2.1	Solyc03g006000.2	HSF
Solyc03g006800.1.1	Solyc03g006800.1	TCP
Solyc03g006900.1.1	Solyc03g006900.1	Trihelix
Solyc03g006910.2.1	Solyc03g006910.2	bHLH
Solyc03g007380.1.1	Solyc03g007380.1	WRKY
Solyc03g007410.2.1	Solyc03g007410.2	bHLH
Solyc03g007640.1.1	Solyc03g007640.1	WRKY
Solyc03g025170.1.1	Solyc03g025170.1	GRAS
Solyc03g026020.2.1	Solyc03g026020.2	HSF
Solyc03g031450.2.1	Solyc03g031450.2	bHLH
Solyc03g033660.2.1	Solyc03g033660.2	GATA
Solyc03g033680.1.1	Solyc03g033680.1	SRS
Solyc03g033730.1.1	Solyc03g033730.1	bZIP
Solyc03g034000.2.1	Solyc03g034000.2	bHLH
Solyc03g043810.1.1	Solyc03g043810.1	bZIP
Solyc03g043820.1.1	Solyc03g043820.1	bZIP
Solyc03g043830.1.1	Solyc03g043830.1	bZIP
Solyc03g043840.1.1	Solyc03g043840.1	bZIP
Solyc03g043900.1.1	Solyc03g043900.1	bZIP
Solyc03g044460.1.1	Solyc03g044460.1	bHLH
Solyc03g044690.1.1	Solyc03g044690.1	FAR1
Solyc03g045030.1.1	Solyc03g045030.1	TCP
Solyc03g046440.1.1	Solyc03g046440.1	bZIP
Solyc03g059300.1.1	Solyc03g059300.1	NAC
Solyc03g061620.1.1	Solyc03g061620.1	ZF-HD
Solyc03g062670.1.1	Solyc03g062670.1	NAC
Solyc03g062750.1.1	Solyc03g062750.1	NAC
Solyc03g063140.2.1	Solyc03g063140.2	LBD
Solyc03g078120.2.1	Solyc03g078120.2	NAC
Solyc03g080090.2.1	Solyc03g080090.2	NAC
Solyc03g082750.1.1	Solyc03g082750.1	WRKY
Solyc03g082810.1.1	Solyc03g082810.1	WRKY
Solyc03g082840.2.1	Solyc03g082840.2	Dof
Solyc03g083040.1.1	Solyc03g083040.1	Nin-like
Solyc03g083880.2.1	Solyc03g083880.2	NAC
Solyc03g095770.2.1	Solyc03g095770.2	WRKY
Solyc03g095940.1.1	Solyc03g095940.1	LBD
Solyc03g095980.2.1	Solyc03g095980.2	bHLH
Solyc03g096630.1.1	Solyc03g096630.1	EIL
Solyc03g097120.2.1	Solyc03g097120.2	HSF
Solyc03g097650.2.1	Solyc03g097650.2	NAC
Solyc03g097820.1.1	Solyc03g097820.1	bHLH
Solyc03g098060.1.1	Solyc03g098060.1	ZF-HD
Solyc03g098190.2.1	Solyc03g098190.2	NAC
Solyc03g104810.2.1	Solyc03g104810.2	WRKY
Solyc03g110840.1.1	Solyc03g110840.1	NF-YC
Solyc03g110850.1.1	Solyc03g110850.1	NF-YC
Solyc03g110860.2.1	Solyc03g110860.2	NF-YC
Solyc03g110950.1.1	Solyc03g110950.1	GRAS
Solyc03g111260.2.1	Solyc03g111260.2	Trihelix
Solyc03g111450.1.1	Solyc03g111450.1	NF-YC
Solyc03g111460.1.1	Solyc03g111460.1	NF-YC
Solyc03g111470.1.1	Solyc03g111470.1	NF-YC
Solyc03g112430.1.1	Solyc03g112430.1	LBD
Solyc03g112930.2.1	Solyc03g112930.2	Dof
Solyc03g113110.1.1	Solyc03g113110.1	FAR1
Solyc03g113120.2.1	Solyc03g113120.2	WRKY
Solyc03g113360.2.1	Solyc03g113360.2	LBD
Solyc03g113560.2.1	Solyc03g113560.2	bHLH
Solyc03g113760.2.1	Solyc03g113760.2	E2F/DP
Solyc03g114220.1.1	Solyc03g114220.1	NAC
Solyc03g114230.1.1	Solyc03g114230.1	bHLH
Solyc03g114260.1.1	Solyc03g114260.1	NAC
Solyc03g114400.2.1	Solyc03g114400.2	NF-YB
Solyc03g114720.2.1	Solyc03g114720.2	bHLH
Solyc03g114850.2.1	Solyc03g114850.2	SBP
Solyc03g115010.1.1	Solyc03g115010.1	TCP
Solyc03g115540.1.1	Solyc03g115540.1	bHLH
Solyc03g115850.2.1	Solyc03g115850.2	NAC
Solyc03g115940.2.1	Solyc03g115940.2	Dof
Solyc03g116010.1.1	Solyc03g116010.1	Nin-like
Solyc03g116070.1.1	Solyc03g116070.1	ZF-HD
Solyc03g116320.2.1	Solyc03g116320.2	TCP
Solyc03g116890.2.1	Solyc03g116890.2	WRKY
Solyc03g117520.1.1	Solyc03g117520.1	FAR1
Solyc03g118160.1.1	Solyc03g118160.1	LFY
Solyc03g118230.1.1	Solyc03g118230.1	Trihelix
Solyc03g118310.2.1	Solyc03g118310.2	bHLH
Solyc03g118420.2.1	Solyc03g118420.2	NF-X1
Solyc03g119390.2.1	Solyc03g119390.2	bHLH
Solyc03g119530.2.1	Solyc03g119530.2	LBD
Solyc03g119770.2.1	Solyc03g119770.2	TCP
Solyc03g120530.2.1	Solyc03g120530.2	bHLH
Solyc03g120890.2.1	Solyc03g120890.2	GATA
Solyc03g121240.1.1	Solyc03g121240.1	bHLH
Solyc03g121400.1.1	Solyc03g121400.1	Dof
Solyc03g121630.2.1	Solyc03g121630.2	FAR1
Solyc03g121940.2.1	Solyc03g121940.2	NF-YA
Solyc03g122030.1.1	Solyc03g122030.1	Trihelix
Solyc03g123400.1.1	Solyc03g123400.1	GRAS
Solyc04g005130.2.1	Solyc04g005130.2	bHLH
Solyc04g005170.1.1	Solyc04g005170.1	bZIP
Solyc04g005220.1.1	Solyc04g005220.1	bHLH
Solyc04g005280.2.1	Solyc04g005280.2	bHLH
Solyc04g005610.2.1	Solyc04g005610.2	NAC
Solyc04g005660.2.1	Solyc04g005660.2	bHLH
Solyc04g006980.1.1	Solyc04g006980.1	TCP
Solyc04g006990.2.1	Solyc04g006990.2	bHLH
Solyc04g007300.2.1	Solyc04g007300.2	bHLH
Solyc04g007430.1.1	Solyc04g007430.1	bHLH
Solyc04g008380.2.1	Solyc04g008380.2	BBR-BPC
Solyc04g009180.1.1	Solyc04g009180.1	TCP
Solyc04g009440.2.1	Solyc04g009440.2	NAC
Solyc04g009520.2.1	Solyc04g009520.2	NF-YB
Solyc04g011630.1.1	Solyc04g011630.1	GRAS
Solyc04g011670.2.1	Solyc04g011670.2	bZIP
Solyc04g014260.1.1	Solyc04g014260.1	ZF-HD
Solyc04g014360.2.1	Solyc04g014360.2	bHLH
Solyc04g014830.1.1	Solyc04g014830.1	GRAS
Solyc04g015060.1.1	Solyc04g015060.1	NF-YB
Solyc04g015360.2.1	Solyc04g015360.2	GATA
Solyc04g015960.2.1	Solyc04g015960.2	NAC
Solyc04g016000.2.1	Solyc04g016000.2	HSF
Solyc04g025760.1.1	Solyc04g025760.1	NAC
Solyc04g045430.2.1	Solyc04g045430.2	Trihelix
Solyc04g045560.2.1	Solyc04g045560.2	SBP
Solyc04g049910.2.1	Solyc04g049910.2	NF-YB
Solyc04g050010.1.1	Solyc04g050010.1	LBD
Solyc04g050210.1.1	Solyc04g050210.1	WRKY
Solyc04g051540.2.1	Solyc04g051540.2	WRKY
Solyc04g051690.2.1	Solyc04g051690.2	WRKY
Solyc04g054150.1.1	Solyc04g054150.1	NF-YB
Solyc04g054320.2.1	Solyc04g054320.2	bZIP
Solyc04g054840.1.1	Solyc04g054840.1	EIL
Solyc04g056270.2.1	Solyc04g056270.2	CAMTA
Solyc04g056360.2.1	Solyc04g056360.2	WRKY
Solyc04g056460.1.1	Solyc04g056460.1	bZIP
Solyc04g064470.1.1	Solyc04g064470.1	SBP
Solyc04g064550.1.1	Solyc04g064550.1	GRAS
Solyc04g070960.1.1	Solyc04g070960.1	Dof
Solyc04g071160.2.1	Solyc04g071160.2	bZIP
Solyc04g071360.2.1	Solyc04g071360.2	Trihelix
Solyc04g071510.2.1	Solyc04g071510.2	bZIP
Solyc04g072070.2.1	Solyc04g072070.2	WRKY
Solyc04g072220.2.1	Solyc04g072220.2	NAC
Solyc04g072460.2.1	Solyc04g072460.2	bZIP
Solyc04g074810.2.1	Solyc04g074810.2	bHLH
Solyc04g074990.2.1	Solyc04g074990.2	ZF-HD
Solyc04g076240.1.1	Solyc04g076240.1	bHLH
Solyc04g076530.2.1	Solyc04g076530.2	GATA
Solyc04g077480.2.1	Solyc04g077480.2	bHLH
Solyc04g077960.1.1	Solyc04g077960.1	bHLH
Solyc04g077990.2.1	Solyc04g077990.2	LBD
Solyc04g078550.2.1	Solyc04g078550.2	WRKY
Solyc04g078670.2.1	Solyc04g078670.2	NAC
Solyc04g078690.2.1	Solyc04g078690.2	bHLH
Solyc04g078770.2.1	Solyc04g078770.2	HSF
Solyc04g078790.2.1	Solyc04g078790.2	bHLH
Solyc04g078840.2.1	Solyc04g078840.2	bZIP
Solyc04g079570.1.1	Solyc04g079570.1	Dof
Solyc04g079940.2.1	Solyc04g079940.2	NAC
Solyc04g079980.2.1	Solyc04g079980.2	BES1
Solyc04g080490.2.1	Solyc04g080490.2	ZF-HD
Solyc04g080710.2.1	Solyc04g080710.2	bHLH
Solyc04g080740.1.1	Solyc04g080740.1	bZIP
Solyc04g080970.2.1	Solyc04g080970.2	SRS
Solyc04g081170.2.1	Solyc04g081170.2	BBR-BPC
Solyc04g081190.2.1	Solyc04g081190.2	bZIP
Solyc04g081350.2.1	Solyc04g081350.2	E2F/DP
Solyc04g082480.2.1	Solyc04g082480.2	Nin-like
Solyc04g082890.2.1	Solyc04g082890.2	bZIP
Solyc05g005240.1.1	Solyc05g005240.1	YABBY
Solyc05g005300.2.1	Solyc05g005300.2	bHLH
Solyc05g005350.1.1	Solyc05g005350.1	NF-YB
Solyc05g005360.1.1	Solyc05g005360.1	NF-YB
Solyc05g005370.1.1	Solyc05g005370.1	NF-YB
Solyc05g005380.1.1	Solyc05g005380.1	NF-YB
Solyc05g005390.1.1	Solyc05g005390.1	NF-YB
Solyc05g005440.1.1	Solyc05g005440.1	NF-YB
Solyc05g006650.2.1	Solyc05g006650.2	bHLH
Solyc05g007100.2.1	Solyc05g007100.2	Whirly
Solyc05g007110.2.1	Solyc05g007110.2	WRKY
Solyc05g007210.2.1	Solyc05g007210.2	bHLH
Solyc05g007420.1.1	Solyc05g007420.1	TCP
Solyc05g007550.1.1	Solyc05g007550.1	NAC
Solyc05g007580.1.1	Solyc05g007580.1	ZF-HD
Solyc05g007770.2.1	Solyc05g007770.2	NAC
Solyc05g007880.2.1	Solyc05g007880.2	Dof
Solyc05g009220.2.1	Solyc05g009220.2	bHLH
Solyc05g009320.2.1	Solyc05g009320.2	LBD
Solyc05g009640.2.1	Solyc05g009640.2	bHLH
Solyc05g009660.2.1	Solyc05g009660.2	bZIP
Solyc05g009840.2.1	Solyc05g009840.2	NAC
Solyc05g009880.2.1	Solyc05g009880.2	bHLH
Solyc05g009900.1.1	Solyc05g009900.1	TCP
Solyc05g010610.2.1	Solyc05g010610.2	bHLH
Solyc05g010740.1.1	Solyc05g010740.1	NAC
Solyc05g011810.2.1	Solyc05g011810.2	bHLH
Solyc05g012040.2.1	Solyc05g012040.2	SBP
Solyc05g012050.2.1	Solyc05g012050.2	YABBY
Solyc05g012500.2.1	Solyc05g012500.2	WRKY
Solyc05g012770.2.1	Solyc05g012770.2	WRKY
Solyc05g012840.1.1	Solyc05g012840.1	TCP
Solyc05g014040.1.1	Solyc05g014040.1	WRKY
Solyc05g014590.2.1	Solyc05g014590.2	bHLH
Solyc05g014800.1.1	Solyc05g014800.1	NF-YC
Solyc05g014830.1.1	Solyc05g014830.1	NF-YC
Solyc05g014930.1.1	Solyc05g014930.1	FAR1
Solyc05g015330.1.1	Solyc05g015330.1	NF-YC
Solyc05g015510.2.1	Solyc05g015510.2	SBP
Solyc05g015550.1.1	Solyc05g015550.1	NF-YB
Solyc05g015650.2.1	Solyc05g015650.2	CAMTA
Solyc05g015840.2.1	Solyc05g015840.2	SBP
Solyc05g015850.2.1	Solyc05g015850.2	WRKY
Solyc05g018350.2.1	Solyc05g018350.2	Trihelix
Solyc05g018740.1.1	Solyc05g018740.1	ZF-HD
Solyc05g020000.1.1	Solyc05g020000.1	ZF-HD
Solyc05g021090.2.1	Solyc05g021090.2	NAC
Solyc05g026180.1.1	Solyc05g026180.1	NAC
Solyc05g032780.1.1	Solyc05g032780.1	TCP
Solyc05g041220.1.1	Solyc05g041220.1	SAP
Solyc05g045710.1.1	Solyc05g045710.1	WRKY
Solyc05g045800.1.1	Solyc05g045800.1	WRKY
Solyc05g045880.1.1	Solyc05g045880.1	WRKY
Solyc05g048740.2.1	Solyc05g048740.2	LBD
Solyc05g050040.1.1	Solyc05g050040.1	WRKY
Solyc05g050050.1.1	Solyc05g050050.1	WRKY
Solyc05g050060.1.1	Solyc05g050060.1	WRKY
Solyc05g050220.2.1	Solyc05g050220.2	bZIP
Solyc05g050300.1.1	Solyc05g050300.1	WRKY
Solyc05g050330.2.1	Solyc05g050330.2	WRKY
Solyc05g050340.2.1	Solyc05g050340.2	WRKY
Solyc05g050560.1.1	Solyc05g050560.1	bHLH
Solyc05g051330.1.1	Solyc05g051330.1	GeBP
Solyc05g051420.1.1	Solyc05g051420.1	ZF-HD
Solyc05g053090.1.1	Solyc05g053090.1	GRAS
Solyc05g053240.2.1	Solyc05g053240.2	SBP
Solyc05g053380.2.1	Solyc05g053380.2	WRKY
Solyc05g053420.1.1	Solyc05g053420.1	GRAS
Solyc05g053500.2.1	Solyc05g053500.2	GATA
Solyc05g053660.1.1	Solyc05g053660.1	bHLH
Solyc05g054170.2.1	Solyc05g054170.2	GRAS
Solyc05g054400.2.1	Solyc05g054400.2	GATA
Solyc05g054510.1.1	Solyc05g054510.1	Dof
Solyc05g055470.2.1	Solyc05g055470.2	NAC
Solyc05g055480.2.1	Solyc05g055480.2	NAC
Solyc05g055750.2.1	Solyc05g055750.2	WRKY
Solyc05g056120.2.1	Solyc05g056120.2	GATA
Solyc06g005090.2.1	Solyc06g005090.2	LBD
Solyc06g005130.2.1	Solyc06g005130.2	Dof
Solyc06g007390.2.1	Solyc06g007390.2	LBD
Solyc06g008030.2.1	Solyc06g008030.2	bHLH
Solyc06g008360.2.1	Solyc06g008360.2	NAC
Solyc06g008610.2.1	Solyc06g008610.2	WRKY
Solyc06g009010.1.1	Solyc06g009010.1	NF-YB
Solyc06g009610.1.1	Solyc06g009610.1	GRAS
Solyc06g009640.1.1	Solyc06g009640.1	bZIP
Solyc06g016750.2.1	Solyc06g016750.2	NF-YC
Solyc06g034340.1.1	Solyc06g034340.1	NAC
Solyc06g035490.2.1	Solyc06g035490.2	bHLH
Solyc06g035620.2.1	Solyc06g035620.2	GRAS
Solyc06g036170.1.1	Solyc06g036170.1	GRAS
Solyc06g048630.2.1	Solyc06g048630.2	bZIP
Solyc06g048870.1.1	Solyc06g048870.1	WRKY
Solyc06g049040.2.1	Solyc06g049040.2	bZIP
Solyc06g050430.2.1	Solyc06g050430.2	LBD
Solyc06g050840.2.1	Solyc06g050840.2	bHLH
Solyc06g050950.2.1	Solyc06g050950.2	LBD
Solyc06g051120.2.1	Solyc06g051120.2	Trihelix
Solyc06g051260.2.1	Solyc06g051260.2	bHLH
Solyc06g051550.2.1	Solyc06g051550.2	bHLH
Solyc06g051570.2.1	Solyc06g051570.2	NF-X1
Solyc06g053350.2.1	Solyc06g053350.2	bZIP
Solyc06g053960.2.1	Solyc06g053960.2	HSF
Solyc06g054040.1.1	Solyc06g054040.1	FAR1
Solyc06g060230.2.1	Solyc06g060230.2	NAC
Solyc06g060490.2.1	Solyc06g060490.2	bZIP
Solyc06g060940.1.1	Solyc06g060940.1	GATA
Solyc06g061080.2.1	Solyc06g061080.2	NAC
Solyc06g062460.2.1	Solyc06g062460.2	bHLH
Solyc06g062520.1.1	Solyc06g062520.1	Dof
Solyc06g062630.2.1	Solyc06g062630.2	LBD
Solyc06g063380.1.1	Solyc06g063380.1	NAC
Solyc06g063430.1.1	Solyc06g063430.1	NAC
Solyc06g064540.1.1	Solyc06g064540.1	LBD
Solyc06g064580.1.1	Solyc06g064580.1	bHLH
Solyc06g064590.1.1	Solyc06g064590.1	bHLH
Solyc06g065040.2.1	Solyc06g065040.2	bHLH
Solyc06g065190.1.1	Solyc06g065190.1	TCP
Solyc06g065410.2.1	Solyc06g065410.2	NAC
Solyc06g066370.2.1	Solyc06g066370.2	WRKY
Solyc06g068200.1.1	Solyc06g068200.1	FAR1
Solyc06g068210.1.1	Solyc06g068210.1	FAR1
Solyc06g068460.2.1	Solyc06g068460.2	WRKY
Solyc06g068580.1.1	Solyc06g068580.1	NAC
Solyc06g068870.2.1	Solyc06g068870.2	bHLH
Solyc06g069100.1.1	Solyc06g069100.1	NAC
Solyc06g069240.1.1	Solyc06g069240.1	TCP
Solyc06g069310.2.1	Solyc06g069310.2	NF-YB
Solyc06g069370.2.1	Solyc06g069370.2	bHLH
Solyc06g069460.1.1	Solyc06g069460.1	TCP
Solyc06g069600.1.1	Solyc06g069600.1	bHLH
Solyc06g069710.2.1	Solyc06g069710.2	NAC
Solyc06g069760.2.1	Solyc06g069760.2	Dof
Solyc06g070900.2.1	Solyc06g070900.2	TCP
Solyc06g070910.2.1	Solyc06g070910.2	bHLH
Solyc06g070990.2.1	Solyc06g070990.2	WRKY
Solyc06g071480.2.1	Solyc06g071480.2	Dof
Solyc06g071660.1.1	Solyc06g071660.1	LBD
Solyc06g072040.1.1	Solyc06g072040.1	NF-YC
Solyc06g072370.2.1	Solyc06g072370.2	BBR-BPC
Solyc06g072520.1.1	Solyc06g072520.1	bHLH
Solyc06g072750.2.1	Solyc06g072750.2	HSF
Solyc06g073050.2.1	Solyc06g073050.2	NAC
Solyc06g073200.2.1	Solyc06g073200.2	FAR1
Solyc06g073210.2.1	Solyc06g073210.2	FAR1
Solyc06g073670.2.1	Solyc06g073670.2	FAR1
Solyc06g073720.1.1	Solyc06g073720.1	EIL
Solyc06g073730.1.1	Solyc06g073730.1	EIL
Solyc06g073920.2.1	Solyc06g073920.2	YABBY
Solyc06g074010.2.1	Solyc06g074010.2	E2F/DP
Solyc06g074170.2.1	Solyc06g074170.2	NAC
Solyc06g074320.2.1	Solyc06g074320.2	bZIP
Solyc06g075140.2.1	Solyc06g075140.2	GATA
Solyc06g075330.1.1	Solyc06g075330.1	LBD
Solyc06g075370.2.1	Solyc06g075370.2	Dof
Solyc06g076030.2.1	Solyc06g076030.2	Dof
Solyc06g076280.1.1	Solyc06g076280.1	GRAS
Solyc06g076290.1.1	Solyc06g076290.1	GRAS
Solyc06g082310.2.1	Solyc06g082310.2	LBD
Solyc06g082430.1.1	Solyc06g082430.1	LBD
Solyc06g082530.1.1	Solyc06g082530.1	GRAS
Solyc06g082770.2.1	Solyc06g082770.2	LBD
Solyc06g083170.2.1	Solyc06g083170.2	bHLH
Solyc06g083430.1.1	Solyc06g083430.1	Trihelix
Solyc06g083840.2.1	Solyc06g083840.2	NAC
Solyc06g083850.2.1	Solyc06g083850.2	NAC
Solyc06g083930.1.1	Solyc06g083930.1	LBD
Solyc06g083980.1.1	Solyc06g083980.1	bHLH
Solyc07g005400.2.1	Solyc07g005400.2	bHLH
Solyc07g005650.2.1	Solyc07g005650.2	WRKY
Solyc07g006840.1.1	Solyc07g006840.1	NAC
Solyc07g008180.2.1	Solyc07g008180.2	YABBY
Solyc07g018010.2.1	Solyc07g018010.2	bHLH
Solyc07g020710.2.1	Solyc07g020710.2	CPP
Solyc07g021550.2.1	Solyc07g021550.2	HRT-like
Solyc07g038160.2.1	Solyc07g038160.2	GATA
Solyc07g039570.2.1	Solyc07g039570.2	bHLH
Solyc07g040680.2.1	Solyc07g040680.2	HSF
Solyc07g043260.2.1	Solyc07g043260.2	FAR1
Solyc07g043270.2.1	Solyc07g043270.2	FAR1
Solyc07g043330.1.1	Solyc07g043330.1	GRAS
Solyc07g043580.2.1	Solyc07g043580.2	bHLH
Solyc07g045030.2.1	Solyc07g045030.2	NAC
Solyc07g045520.2.1	Solyc07g045520.2	FAR1
Solyc07g045550.1.1	Solyc07g045550.1	SAP
Solyc07g045560.1.1	Solyc07g045560.1	SAP
Solyc07g047950.1.1	Solyc07g047950.1	GRAS
Solyc07g047960.2.1	Solyc07g047960.2	WRKY
Solyc07g051840.2.1	Solyc07g051840.2	WRKY
Solyc07g052670.2.1	Solyc07g052670.2	bHLH
Solyc07g052760.1.1	Solyc07g052760.1	GeBP
Solyc07g052830.2.1	Solyc07g052830.2	GeBP
Solyc07g052900.1.1	Solyc07g052900.1	GeBP
Solyc07g052930.2.1	Solyc07g052930.2	bHLH
Solyc07g052960.1.1	Solyc07g052960.1	GRAS
Solyc07g053290.2.1	Solyc07g053290.2	bHLH
Solyc07g053410.2.1	Solyc07g053410.2	TCP
Solyc07g053450.2.1	Solyc07g053450.2	bZIP
Solyc07g053590.2.1	Solyc07g053590.2	NAC
Solyc07g053680.1.1	Solyc07g053680.1	NAC
Solyc07g053810.2.1	Solyc07g053810.2	SBP
Solyc07g055100.2.1	Solyc07g055100.2	Trihelix
Solyc07g055280.2.1	Solyc07g055280.2	WRKY
Solyc07g055710.2.1	Solyc07g055710.2	HSF
Solyc07g056280.2.1	Solyc07g056280.2	WRKY
Solyc07g062050.2.1	Solyc07g062050.2	STAT
Solyc07g062200.1.1	Solyc07g062200.1	bHLH
Solyc07g062240.1.1	Solyc07g062240.1	NAC
Solyc07g062260.2.1	Solyc07g062260.2	BES1
Solyc07g062680.1.1	Solyc07g062680.1	TCP
Solyc07g062710.2.1	Solyc07g062710.2	bZIP
Solyc07g062840.2.1	Solyc07g062840.2	NAC
Solyc07g062980.2.1	Solyc07g062980.2	SBP
Solyc07g063410.2.1	Solyc07g063410.2	NAC
Solyc07g063420.2.1	Solyc07g063420.2	NAC
Solyc07g063670.2.1	Solyc07g063670.2	NZZ/SPL
Solyc07g063830.2.1	Solyc07g063830.2	bHLH
Solyc07g063840.1.1	Solyc07g063840.1	GeBP
Solyc07g063940.1.1	Solyc07g063940.1	GRAS
Solyc07g064000.1.1	Solyc07g064000.1	GeBP
Solyc07g064040.2.1	Solyc07g064040.2	bHLH
Solyc07g065260.2.1	Solyc07g065260.2	WRKY
Solyc07g065270.1.1	Solyc07g065270.1	GRAS
Solyc07g065500.1.1	Solyc07g065500.1	NF-YB
Solyc07g065570.1.1	Solyc07g065570.1	NF-YB
Solyc07g065580.1.1	Solyc07g065580.1	NF-YB
Solyc07g066220.2.1	Solyc07g066220.2	WRKY
Solyc07g066250.1.1	Solyc07g066250.1	GRAS
Solyc07g066330.2.1	Solyc07g066330.2	NAC
Solyc08g005050.2.1	Solyc08g005050.2	bHLH
Solyc08g005170.2.1	Solyc08g005170.2	HSF
Solyc08g005290.2.1	Solyc08g005290.2	bZIP
Solyc08g005780.2.1	Solyc08g005780.2	BES1
Solyc08g005900.2.1	Solyc08g005900.2	Trihelix
Solyc08g006020.2.1	Solyc08g006020.2	NAC
Solyc08g006110.2.1	Solyc08g006110.2	bZIP
Solyc08g006320.2.1	Solyc08g006320.2	WRKY
Solyc08g007020.1.1	Solyc08g007020.1	NAC
Solyc08g007170.1.1	Solyc08g007170.1	Trihelix
Solyc08g007190.2.1	Solyc08g007190.2	GATA
Solyc08g007960.1.1	Solyc08g007960.1	NF-YC
Solyc08g008280.2.1	Solyc08g008280.2	WRKY
Solyc08g008410.2.1	Solyc08g008410.2	Nin-like
Solyc08g008500.2.1	Solyc08g008500.2	Dof
Solyc08g008600.2.1	Solyc08g008600.2	bHLH
Solyc08g008660.2.1	Solyc08g008660.2	NAC
Solyc08g013900.2.1	Solyc08g013900.2	Nin-like
Solyc08g014030.1.1	Solyc08g014030.1	GRAS
Solyc08g022080.2.1	Solyc08g022080.2	bZIP
Solyc08g028850.1.1	Solyc08g028850.1	NAC
Solyc08g048370.2.1	Solyc08g048370.2	TCP
Solyc08g048390.1.1	Solyc08g048390.1	TCP
Solyc08g060840.1.1	Solyc08g060840.1	FAR1
Solyc08g061130.2.1	Solyc08g061130.2	bZIP
Solyc08g062200.1.1	Solyc08g062200.1	Nin-like
Solyc08g062210.2.1	Solyc08g062210.2	NF-YA
Solyc08g062490.2.1	Solyc08g062490.2	WRKY
Solyc08g062780.1.1	Solyc08g062780.1	bHLH
Solyc08g062960.2.1	Solyc08g062960.2	HSF
Solyc08g065130.1.1	Solyc08g065130.1	LBD
Solyc08g066510.2.1	Solyc08g066510.2	GATA
Solyc08g067150.2.1	Solyc08g067150.2	CPP
Solyc08g067340.2.1	Solyc08g067340.2	WRKY
Solyc08g067360.2.1	Solyc08g067360.2	WRKY
Solyc08g068380.2.1	Solyc08g068380.2	NAC
Solyc08g069160.2.1	Solyc08g069160.2	Trihelix
Solyc08g074300.2.1	Solyc08g074300.2	NAC
Solyc08g074860.1.1	Solyc08g074860.1	bZIP
Solyc08g075090.2.1	Solyc08g075090.2	bHLH
Solyc08g075110.1.1	Solyc08g075110.1	bHLH
Solyc08g076100.2.1	Solyc08g076100.2	bZIP
Solyc08g076230.1.1	Solyc08g076230.1	BBR-BPC
Solyc08g076330.1.1	Solyc08g076330.1	FAR1
Solyc08g076590.2.1	Solyc08g076590.2	HSF
Solyc08g076820.2.1	Solyc08g076820.2	bHLH
Solyc08g076930.1.1	Solyc08g076930.1	bHLH
Solyc08g077110.2.1	Solyc08g077110.2	NAC
Solyc08g077450.2.1	Solyc08g077450.2	SRS
Solyc08g077960.2.1	Solyc08g077960.2	GATA
Solyc08g078800.1.1	Solyc08g078800.1	GRAS
Solyc08g079100.2.1	Solyc08g079100.2	YABBY
Solyc08g079120.1.1	Solyc08g079120.1	NAC
Solyc08g080150.1.1	Solyc08g080150.1	TCP
Solyc08g080400.1.1	Solyc08g080400.1	GRAS
Solyc08g080540.2.1	Solyc08g080540.2	HSF
Solyc08g081140.2.1	Solyc08g081140.2	bHLH
Solyc08g081610.2.1	Solyc08g081610.2	WRKY
Solyc08g081630.1.1	Solyc08g081630.1	WRKY
Solyc08g082110.2.1	Solyc08g082110.2	WRKY
Solyc08g082750.2.1	Solyc08g082750.2	Nin-like
Solyc08g082910.1.1	Solyc08g082910.1	Dof
Solyc08g083170.1.1	Solyc08g083170.1	bHLH
Solyc09g005070.1.1	Solyc09g005070.1	bHLH
Solyc09g005560.2.1	Solyc09g005560.2	Trihelix
Solyc09g007290.2.1	Solyc09g007290.2	NF-YB
Solyc09g007500.2.1	Solyc09g007500.2	S1Fa-like
Solyc09g008030.1.1	Solyc09g008030.1	TCP
Solyc09g008850.2.1	Solyc09g008850.2	Trihelix
Solyc09g009100.2.1	Solyc09g009100.2	HSF
Solyc09g009250.2.1	Solyc09g009250.2	Trihelix
Solyc09g009490.2.1	Solyc09g009490.2	bZIP
Solyc09g009760.1.1	Solyc09g009760.1	bZIP
Solyc09g010160.1.1	Solyc09g010160.1	NAC
Solyc09g010490.1.1	Solyc09g010490.1	LBD
Solyc09g010670.2.1	Solyc09g010670.2	E2F/DP
Solyc09g010680.2.1	Solyc09g010680.2	Dof
Solyc09g010920.1.1	Solyc09g010920.1	GRAS
Solyc09g010960.2.1	Solyc09g010960.2	WRKY
Solyc09g014690.1.1	Solyc09g014690.1	LBD
Solyc09g014700.1.1	Solyc09g014700.1	LBD
Solyc09g014990.2.1	Solyc09g014990.2	WRKY
Solyc09g015770.2.1	Solyc09g015770.2	WRKY
Solyc09g018130.1.1	Solyc09g018130.1	bHLH
Solyc09g018150.1.1	Solyc09g018150.1	bHLH
Solyc09g018460.1.1	Solyc09g018460.1	GRAS
Solyc09g025310.2.1	Solyc09g025310.2	NAC
Solyc09g057710.2.1	Solyc09g057710.2	bHLH
Solyc09g057870.2.1	Solyc09g057870.2	FAR1
Solyc09g057880.2.1	Solyc09g057880.2	FAR1
Solyc09g059520.2.1	Solyc09g059520.2	HSF
Solyc09g063010.2.1	Solyc09g063010.2	bHLH
Solyc09g064920.2.1	Solyc09g064920.2	bHLH
Solyc09g065100.1.1	Solyc09g065100.1	bHLH
Solyc09g065660.2.1	Solyc09g065660.2	HSF
Solyc09g065820.2.1	Solyc09g065820.2	bHLH
Solyc09g066010.2.1	Solyc09g066010.2	WRKY
Solyc09g066260.2.1	Solyc09g066260.2	LBD
Solyc09g066270.2.1	Solyc09g066270.2	LBD
Solyc09g066450.1.1	Solyc09g066450.1	GRAS
Solyc09g074760.1.1	Solyc09g074760.1	NF-YB
Solyc09g074810.2.1	Solyc09g074810.2	bHLH
Solyc09g075610.2.1	Solyc09g075610.2	GATA
Solyc09g075640.2.1	Solyc09g075640.2	FAR1
Solyc09g082500.2.1	Solyc09g082500.2	CPP
Solyc09g082670.2.1	Solyc09g082670.2	HSF
Solyc09g083220.2.1	Solyc09g083220.2	bHLH
Solyc09g083360.2.1	Solyc09g083360.2	bHLH
Solyc09g089550.2.1	Solyc09g089550.2	ZF-HD
Solyc09g089870.2.1	Solyc09g089870.2	bHLH
Solyc09g090830.2.1	Solyc09g090830.2	GRAS
Solyc09g091250.2.1	Solyc09g091250.2	GATA
Solyc09g091760.1.1	Solyc09g091760.1	bHLH
Solyc09g097870.2.1	Solyc09g097870.2	bHLH
Solyc09g098110.2.1	Solyc09g098110.2	bHLH
Solyc10g005010.2.1	Solyc10g005010.2	NAC
Solyc10g005680.1.1	Solyc10g005680.1	WRKY
Solyc10g006510.2.1	Solyc10g006510.2	bHLH
Solyc10g006640.2.1	Solyc10g006640.2	bHLH
Solyc10g006880.2.1	Solyc10g006880.2	NAC
Solyc10g007970.1.1	Solyc10g007970.1	WRKY
Solyc10g008250.1.1	Solyc10g008250.1	bHLH
Solyc10g008260.1.1	Solyc10g008260.1	bHLH
Solyc10g008270.2.1	Solyc10g008270.2	bHLH
Solyc10g008780.1.1	Solyc10g008780.1	TCP
Solyc10g008880.2.1	Solyc10g008880.2	VOZ
Solyc10g009080.2.1	Solyc10g009080.2	SBP
Solyc10g009270.2.1	Solyc10g009270.2	bHLH
Solyc10g009290.1.1	Solyc10g009290.1	bHLH
Solyc10g009360.2.1	Solyc10g009360.2	Dof
Solyc10g009440.2.1	Solyc10g009440.2	NF-YB
Solyc10g009550.2.1	Solyc10g009550.2	WRKY
Solyc10g011910.2.1	Solyc10g011910.2	WRKY
Solyc10g018510.1.1	Solyc10g018510.1	bHLH
Solyc10g018560.1.1	Solyc10g018560.1	GATA
Solyc10g018710.1.1	Solyc10g018710.1	TCP
Solyc10g018780.1.1	Solyc10g018780.1	SBP
Solyc10g047060.1.1	Solyc10g047060.1	NAC
Solyc10g047640.1.1	Solyc10g047640.1	GATA
Solyc10g049720.1.1	Solyc10g049720.1	bHLH
Solyc10g049780.1.1	Solyc10g049780.1	bHLH
Solyc10g050210.1.1	Solyc10g050210.1	bZIP
Solyc10g054010.1.1	Solyc10g054010.1	bZIP
Solyc10g054070.1.1	Solyc10g054070.1	SRS
Solyc10g055550.1.1	Solyc10g055550.1	bZIP
Solyc10g055760.1.1	Solyc10g055760.1	NAC
Solyc10g074680.1.1	Solyc10g074680.1	GRAS
Solyc10g076390.1.1	Solyc10g076390.1	BES1
Solyc10g076920.1.1	Solyc10g076920.1	bZIP
Solyc10g078290.1.1	Solyc10g078290.1	bZIP
Solyc10g078380.1.1	Solyc10g078380.1	bHLH
Solyc10g078430.1.1	Solyc10g078430.1	E2F/DP
Solyc10g078670.1.1	Solyc10g078670.1	bZIP
Solyc10g078700.1.1	Solyc10g078700.1	SBP
Solyc10g079050.1.1	Solyc10g079050.1	bHLH
Solyc10g079070.1.1	Solyc10g079070.1	bHLH
Solyc10g079150.1.1	Solyc10g079150.1	NF-YA
Solyc10g079220.2.1	Solyc10g079220.2	NAC
Solyc10g079380.1.1	Solyc10g079380.1	HSF
Solyc10g079650.1.1	Solyc10g079650.1	bHLH
Solyc10g079660.1.1	Solyc10g079660.1	bHLH
Solyc10g079680.1.1	Solyc10g079680.1	bHLH
Solyc10g080410.1.1	Solyc10g080410.1	bZIP
Solyc10g080770.1.1	Solyc10g080770.1	bZIP
Solyc10g081350.1.1	Solyc10g081350.1	bZIP
Solyc10g081840.1.1	Solyc10g081840.1	NF-YA
Solyc10g083450.1.1	Solyc10g083450.1	NAC
Solyc10g084220.1.1	Solyc10g084220.1	FAR1
Solyc10g084380.1.1	Solyc10g084380.1	WRKY
Solyc10g086370.1.1	Solyc10g086370.1	GRAS
Solyc10g086380.1.1	Solyc10g086380.1	GRAS
Solyc10g086440.1.1	Solyc10g086440.1	Dof
Solyc10g086530.1.1	Solyc10g086530.1	GRAS
Solyc11g005380.1.1	Solyc11g005380.1	Trihelix
Solyc11g005610.1.1	Solyc11g005610.1	GRAS
Solyc11g005780.1.1	Solyc11g005780.1	bHLH
Solyc11g005920.1.1	Solyc11g005920.1	NAC
Solyc11g008000.1.1	Solyc11g008000.1	NAC
Solyc11g008010.1.1	Solyc11g008010.1	NAC
Solyc11g008830.1.1	Solyc11g008830.1	LBD
Solyc11g010340.1.1	Solyc11g010340.1	bHLH
Solyc11g010940.1.1	Solyc11g010940.1	Dof
Solyc11g011260.1.1	Solyc11g011260.1	GRAS
Solyc11g012510.1.1	Solyc11g012510.1	GRAS
Solyc11g012720.1.1	Solyc11g012720.1	Trihelix
Solyc11g012750.1.1	Solyc11g012750.1	NF-YB
Solyc11g013150.1.1	Solyc11g013150.1	GRAS
Solyc11g016910.1.1	Solyc11g016910.1	NF-YC
Solyc11g016920.1.1	Solyc11g016920.1	NF-YC
Solyc11g017100.1.1	Solyc11g017100.1	GRAS
Solyc11g017210.1.1	Solyc11g017210.1	FAR1
Solyc11g017470.1.1	Solyc11g017470.1	NAC
Solyc11g018660.1.1	Solyc11g018660.1	NAC
Solyc11g020670.1.1	Solyc11g020670.1	TCP
Solyc11g020950.1.1	Solyc11g020950.1	bZIP
Solyc11g022480.1.1	Solyc11g022480.1	NAC
Solyc11g044560.1.1	Solyc11g044560.1	bZIP
Solyc11g044750.1.1	Solyc11g044750.1	Whirly
Solyc11g045350.1.1	Solyc11g045350.1	Nin-like
Solyc11g045530.1.1	Solyc11g045530.1	LBD
Solyc11g045640.1.1	Solyc11g045640.1	TCP
Solyc11g051000.1.1	Solyc11g051000.1	FAR1
Solyc11g056650.1.1	Solyc11g056650.1	bHLH
Solyc11g064800.1.1	Solyc11g064800.1	SRS
Solyc11g064950.1.1	Solyc11g064950.1	bZIP
Solyc11g064990.1.1	Solyc11g064990.1	HSF
Solyc11g065540.1.1	Solyc11g065540.1	NAC
Solyc11g065700.1.1	Solyc11g065700.1	NF-YA
Solyc11g066050.1.1	Solyc11g066050.1	Dof
Solyc11g068370.1.1	Solyc11g068370.1	bZIP
Solyc11g068480.1.1	Solyc11g068480.1	NF-YB
Solyc11g068620.1.1	Solyc11g068620.1	NAC
Solyc11g068750.1.1	Solyc11g068750.1	NAC
Solyc11g068800.1.1	Solyc11g068800.1	E2F/DP
Solyc11g069510.1.1	Solyc11g069510.1	GATA
Solyc11g071810.1.1	Solyc11g071810.1	YABBY
Solyc11g072150.1.1	Solyc11g072150.1	NF-YC
Solyc11g072470.1.1	Solyc11g072470.1	LBD
Solyc11g072500.1.1	Solyc11g072500.1	Dof
Solyc12g005340.1.1	Solyc12g005340.1	GRAS
Solyc12g006120.1.1	Solyc12g006120.1	NF-YB
Solyc12g006170.1.1	Solyc12g006170.1	WRKY
Solyc12g007070.1.1	Solyc12g007070.1	HSF
Solyc12g007180.1.1	Solyc12g007180.1	CPP
Solyc12g008830.1.1	Solyc12g008830.1	GATA
Solyc12g009050.1.1	Solyc12g009050.1	NF-YA
Solyc12g009580.1.1	Solyc12g009580.1	YABBY
Solyc12g010170.1.1	Solyc12g010170.1	bHLH
Solyc12g010800.1.1	Solyc12g010800.1	bZIP
Solyc12g010810.1.1	Solyc12g010810.1	LBD
Solyc12g010890.1.1	Solyc12g010890.1	Trihelix
Solyc12g011190.1.1	Solyc12g011190.1	Nin-like
Solyc12g011200.1.1	Solyc12g011200.1	WRKY
Solyc12g013620.1.1	Solyc12g013620.1	NAC
Solyc12g014140.1.1	Solyc12g014140.1	TCP
Solyc12g014610.1.1	Solyc12g014610.1	WRKY
Solyc12g017400.1.1	Solyc12g017400.1	NAC
Solyc12g027650.1.1	Solyc12g027650.1	NF-YB
Solyc12g035520.1.1	Solyc12g035520.1	CAMTA
Solyc12g036430.1.1	Solyc12g036430.1	bHLH
Solyc12g036470.1.1	Solyc12g036470.1	bHLH
Solyc12g036480.1.1	Solyc12g036480.1	NAC
Solyc12g038520.1.1	Solyc12g038520.1	SBP
Solyc12g042010.1.1	Solyc12g042010.1	bHLH
Solyc12g042590.1.1	Solyc12g042590.1	WRKY
Solyc12g043090.1.1	Solyc12g043090.1	Trihelix
Solyc12g049320.1.1	Solyc12g049320.1	GRAS
Solyc12g056510.1.1	Solyc12g056510.1	Trihelix
Solyc12g056750.1.1	Solyc12g056750.1	WRKY
Solyc12g056790.1.1	Solyc12g056790.1	NAC
Solyc12g056860.1.1	Solyc12g056860.1	bZIP
Solyc12g077540.1.1	Solyc12g077540.1	Trihelix
Solyc12g087850.1.1	Solyc12g087850.1	bHLH
Solyc12g088130.1.1	Solyc12g088130.1	bHLH
Solyc12g088790.1.1	Solyc12g088790.1	bHLH
Solyc12g089040.1.1	Solyc12g089040.1	BES1
Solyc12g096350.1.1	Solyc12g096350.1	WRKY
Solyc12g098520.1.1	Solyc12g098520.1	HSF
Solyc12g098620.1.1	Solyc12g098620.1	bHLH
Solyc12g099220.1.1	Solyc12g099220.1	GRAS
Solyc12g099340.1.1	Solyc12g099340.1	CAMTA
Solyc12g099370.1.1	Solyc12g099370.1	GATA
Solyc12g099900.1.1	Solyc12g099900.1	GRAS
Solyc12g100040.1.1	Solyc12g100040.1	Trihelix
Solyc12g100140.1.1	Solyc12g100140.1	bHLH
Solyc12g100150.1.1	Solyc12g100150.1	LBD
Solyc00g196060.2.1	Solyc00g196060.2	ARF
Solyc01g096070.2.1	Solyc01g096070.2	ARF
Solyc01g103050.2.1	Solyc01g103050.2	ARF
Solyc02g037530.2.1	Solyc02g037530.2	ARF
Solyc02g077560.2.1	Solyc02g077560.2	ARF
Solyc03g031970.2.1	Solyc03g031970.2	ARF
Solyc03g118290.2.1	Solyc03g118290.2	ARF
Solyc04g081240.2.1	Solyc04g081240.2	ARF
Solyc05g047460.2.1	Solyc05g047460.2	ARF
Solyc05g056040.2.1	Solyc05g056040.2	ARF
Solyc06g075150.2.1	Solyc06g075150.2	ARF
Solyc07g016180.2.1	Solyc07g016180.2	ARF
Solyc07g042260.2.1	Solyc07g042260.2	ARF
Solyc07g043620.2.1	Solyc07g043620.2	ARF
Solyc08g008380.2.1	Solyc08g008380.2	ARF
Solyc08g082630.2.1	Solyc08g082630.2	ARF
Solyc09g007810.2.1	Solyc09g007810.2	ARF
Solyc10g086130.1.1	Solyc10g086130.1	ARF
Solyc11g013480.1.1	Solyc11g013480.1	ARF
Solyc11g069190.1.1	Solyc11g069190.1	ARF
Solyc11g069500.1.1	Solyc11g069500.1	ARF
Solyc12g042070.1.1	Solyc12g042070.1	ARF
Solyc00g011550.1.1	Solyc00g011550.1	B3
Solyc00g011660.1.1	Solyc00g011660.1	B3
Solyc00g057280.1.1	Solyc00g057280.1	B3
Solyc01g015210.1.1	Solyc01g015210.1	B3
Solyc01g060370.1.1	Solyc01g060370.1	B3
Solyc01g079560.2.1	Solyc01g079560.2	B3
Solyc01g081400.2.1	Solyc01g081400.2	B3
Solyc01g095880.1.1	Solyc01g095880.1	B3
Solyc01g096790.2.1	Solyc01g096790.2	B3
Solyc01g106230.2.1	Solyc01g106230.2	B3
Solyc01g106250.2.1	Solyc01g106250.2	B3
Solyc01g108120.2.1	Solyc01g108120.2	B3
Solyc01g108130.2.1	Solyc01g108130.2	B3
Solyc01g108140.2.1	Solyc01g108140.2	B3
Solyc01g108930.2.1	Solyc01g108930.2	B3
Solyc01g108940.1.1	Solyc01g108940.1	B3
Solyc01g108950.1.1	Solyc01g108950.1	B3
Solyc02g021260.1.1	Solyc02g021260.1	B3
Solyc02g026080.1.1	Solyc02g026080.1	B3
Solyc02g032070.1.1	Solyc02g032070.1	B3
Solyc02g055370.2.1	Solyc02g055370.2	B3
Solyc02g065310.1.1	Solyc02g065310.1	B3
Solyc02g065340.1.1	Solyc02g065340.1	B3
Solyc02g065350.2.1	Solyc02g065350.2	B3
Solyc02g079020.2.1	Solyc02g079020.2	B3
Solyc02g081780.1.1	Solyc02g081780.1	B3
Solyc02g090170.2.1	Solyc02g090170.2	B3
Solyc02g090710.2.1	Solyc02g090710.2	B3
Solyc02g094460.1.1	Solyc02g094460.1	B3
Solyc03g007140.2.1	Solyc03g007140.2	B3
Solyc03g042500.1.1	Solyc03g042500.1	B3
Solyc03g042510.1.1	Solyc03g042510.1	B3
Solyc03g043580.1.1	Solyc03g043580.1	B3
Solyc03g044110.1.1	Solyc03g044110.1	B3
Solyc03g111410.2.1	Solyc03g111410.2	B3
Solyc03g111500.2.1	Solyc03g111500.2	B3
Solyc04g015500.2.1	Solyc04g015500.2	B3
Solyc04g064830.2.1	Solyc04g064830.2	B3
Solyc04g079130.2.1	Solyc04g079130.2	B3
Solyc04g079590.2.1	Solyc04g079590.2	B3
Solyc05g017740.1.1	Solyc05g017740.1	B3
Solyc05g041100.1.1	Solyc05g041100.1	B3
Solyc06g007530.2.1	Solyc06g007530.2	B3
Solyc06g034140.1.1	Solyc06g034140.1	B3
Solyc06g073980.2.1	Solyc06g073980.2	B3
Solyc06g074160.1.1	Solyc06g074160.1	B3
Solyc06g082520.2.1	Solyc06g082520.2	B3
Solyc06g083590.2.1	Solyc06g083590.2	B3
Solyc06g083600.1.1	Solyc06g083600.1	B3
Solyc07g017470.1.1	Solyc07g017470.1	B3
Solyc07g054630.2.1	Solyc07g054630.2	B3
Solyc08g006190.1.1	Solyc08g006190.1	B3
Solyc08g006200.1.1	Solyc08g006200.1	B3
Solyc08g006210.1.1	Solyc08g006210.1	B3
Solyc08g006220.2.1	Solyc08g006220.2	B3
Solyc08g006230.2.1	Solyc08g006230.2	B3
Solyc08g006240.1.1	Solyc08g006240.1	B3
Solyc08g006260.1.1	Solyc08g006260.1	B3
Solyc08g006270.1.1	Solyc08g006270.1	B3
Solyc08g006280.1.1	Solyc08g006280.1	B3
Solyc08g006490.1.1	Solyc08g006490.1	B3
Solyc08g013690.1.1	Solyc08g013690.1	B3
Solyc08g013700.1.1	Solyc08g013700.1	B3
Solyc08g029090.2.1	Solyc08g029090.2	B3
Solyc08g068540.2.1	Solyc08g068540.2	B3
Solyc08g083400.2.1	Solyc08g083400.2	B3
Solyc09g010230.1.1	Solyc09g010230.1	B3
Solyc10g053890.1.1	Solyc10g053890.1	B3
Solyc10g075030.1.1	Solyc10g075030.1	B3
Solyc10g083210.1.1	Solyc10g083210.1	B3
Solyc11g045450.1.1	Solyc11g045450.1	B3
Solyc12g007300.1.1	Solyc12g007300.1	B3
Solyc12g098460.1.1	Solyc12g098460.1	B3
Solyc01g008890.2.1	Solyc01g008890.2	AP2
Solyc01g096860.1.1	Solyc01g096860.1	AP2
Solyc02g064960.2.1	Solyc02g064960.2	AP2
Solyc02g092050.2.1	Solyc02g092050.2	AP2
Solyc02g093150.2.1	Solyc02g093150.2	AP2
Solyc03g044300.2.1	Solyc03g044300.2	AP2
Solyc03g117720.2.1	Solyc03g117720.2	AP2
Solyc03g123430.2.1	Solyc03g123430.2	AP2
Solyc04g009450.1.1	Solyc04g009450.1	AP2
Solyc04g077490.2.1	Solyc04g077490.2	AP2
Solyc05g051380.2.1	Solyc05g051380.2	AP2
Solyc06g066390.1.1	Solyc06g066390.1	AP2
Solyc06g068570.2.1	Solyc06g068570.2	AP2
Solyc06g075510.2.1	Solyc06g075510.2	AP2
Solyc07g018290.2.1	Solyc07g018290.2	AP2
Solyc08g076380.1.1	Solyc08g076380.1	AP2
Solyc08g081650.1.1	Solyc08g081650.1	AP2
Solyc08g081670.1.1	Solyc08g081670.1	AP2
Solyc10g084340.1.1	Solyc10g084340.1	AP2
Solyc11g008560.1.1	Solyc11g008560.1	AP2
Solyc11g010710.1.1	Solyc11g010710.1	AP2
Solyc11g061750.1.1	Solyc11g061750.1	AP2
Solyc12g010490.1.1	Solyc12g010490.1	AP2
Solyc09g007260.2.1	Solyc09g007260.2	AP2
Solyc11g072600.1.1	Solyc11g072600.1	AP2
Solyc02g030210.2.1	Solyc02g030210.2	AP2
Solyc04g049800.2.1	Solyc04g049800.2	AP2
Solyc01g005630.1.1	Solyc01g005630.1	ERF
Solyc01g008880.1.1	Solyc01g008880.1	ERF
Solyc01g009440.1.1	Solyc01g009440.1	ERF
Solyc01g014720.1.1	Solyc01g014720.1	ERF
Solyc01g057080.1.1	Solyc01g057080.1	ERF
Solyc01g065980.2.1	Solyc01g065980.2	ERF
Solyc01g067540.1.1	Solyc01g067540.1	ERF
Solyc01g090300.2.1	Solyc01g090300.2	ERF
Solyc01g090310.2.1	Solyc01g090310.2	ERF
Solyc01g090320.2.1	Solyc01g090320.2	ERF
Solyc01g090340.2.1	Solyc01g090340.2	ERF
Solyc01g090370.1.1	Solyc01g090370.1	ERF
Solyc01g090560.2.1	Solyc01g090560.2	ERF
Solyc01g091760.2.1	Solyc01g091760.2	ERF
Solyc01g095500.2.1	Solyc01g095500.2	ERF
Solyc01g108240.2.1	Solyc01g108240.2	ERF
Solyc02g067020.1.1	Solyc02g067020.1	ERF
Solyc02g077360.1.1	Solyc02g077360.1	ERF
Solyc02g077370.1.1	Solyc02g077370.1	ERF
Solyc02g077810.1.1	Solyc02g077810.1	ERF
Solyc02g077840.1.1	Solyc02g077840.1	ERF
Solyc02g090770.1.1	Solyc02g090770.1	ERF
Solyc02g090790.1.1	Solyc02g090790.1	ERF
Solyc02g090800.1.1	Solyc02g090800.1	ERF
Solyc02g093130.1.1	Solyc02g093130.1	ERF
Solyc03g005500.1.1	Solyc03g005500.1	ERF
Solyc03g005510.1.1	Solyc03g005510.1	ERF
Solyc03g005520.1.1	Solyc03g005520.1	ERF
Solyc03g006320.1.1	Solyc03g006320.1	ERF
Solyc03g007460.1.1	Solyc03g007460.1	ERF
Solyc03g026270.1.1	Solyc03g026270.1	ERF
Solyc03g026280.2.1	Solyc03g026280.2	ERF
Solyc03g093530.1.1	Solyc03g093530.1	ERF
Solyc03g093540.1.1	Solyc03g093540.1	ERF
Solyc03g093550.1.1	Solyc03g093550.1	ERF
Solyc03g093560.1.1	Solyc03g093560.1	ERF
Solyc03g093610.1.1	Solyc03g093610.1	ERF
Solyc03g114440.1.1	Solyc03g114440.1	ERF
Solyc03g116610.2.1	Solyc03g116610.2	ERF
Solyc03g117130.2.1	Solyc03g117130.2	ERF
Solyc03g117230.1.1	Solyc03g117230.1	ERF
Solyc03g118190.2.1	Solyc03g118190.2	ERF
Solyc03g119580.1.1	Solyc03g119580.1	ERF
Solyc03g119800.1.1	Solyc03g119800.1	ERF
Solyc03g120840.1.1	Solyc03g120840.1	ERF
Solyc03g123500.2.1	Solyc03g123500.2	ERF
Solyc03g124110.1.1	Solyc03g124110.1	ERF
Solyc04g007180.1.1	Solyc04g007180.1	ERF
Solyc04g012050.2.1	Solyc04g012050.2	ERF
Solyc04g014530.1.1	Solyc04g014530.1	ERF
Solyc04g050750.1.1	Solyc04g050750.1	ERF
Solyc04g051360.2.1	Solyc04g051360.2	ERF
Solyc04g054910.2.1	Solyc04g054910.2	ERF
Solyc04g071770.2.1	Solyc04g071770.2	ERF
Solyc04g072300.1.1	Solyc04g072300.1	ERF
Solyc04g072900.1.1	Solyc04g072900.1	ERF
Solyc04g078640.1.1	Solyc04g078640.1	ERF
Solyc04g080910.1.1	Solyc04g080910.1	ERF
Solyc05g009250.1.1	Solyc05g009250.1	ERF
Solyc05g009450.1.1	Solyc05g009450.1	ERF
Solyc05g013540.1.1	Solyc05g013540.1	ERF
Solyc05g050790.1.1	Solyc05g050790.1	ERF
Solyc05g050830.1.1	Solyc05g050830.1	ERF
Solyc05g051180.1.1	Solyc05g051180.1	ERF
Solyc05g051200.1.1	Solyc05g051200.1	ERF
Solyc05g052030.1.1	Solyc05g052030.1	ERF
Solyc05g052040.1.1	Solyc05g052040.1	ERF
Solyc05g052050.1.1	Solyc05g052050.1	ERF
Solyc05g052410.1.1	Solyc05g052410.1	ERF
Solyc06g035700.1.1	Solyc06g035700.1	ERF
Solyc06g050520.1.1	Solyc06g050520.1	ERF
Solyc06g051840.1.1	Solyc06g051840.1	ERF
Solyc06g053240.2.1	Solyc06g053240.2	ERF
Solyc06g054630.1.1	Solyc06g054630.1	ERF
Solyc06g063070.2.1	Solyc06g063070.2	ERF
Solyc06g065820.2.1	Solyc06g065820.2	ERF
Solyc06g066540.1.1	Solyc06g066540.1	ERF
Solyc06g068360.2.1	Solyc06g068360.2	ERF
Solyc06g068830.1.1	Solyc06g068830.1	ERF
Solyc06g082590.1.1	Solyc06g082590.1	ERF
Solyc07g042230.1.1	Solyc07g042230.1	ERF
Solyc07g049490.1.1	Solyc07g049490.1	ERF
Solyc07g053740.1.1	Solyc07g053740.1	ERF
Solyc07g054220.1.1	Solyc07g054220.1	ERF
Solyc07g064890.1.1	Solyc07g064890.1	ERF
Solyc08g007230.1.1	Solyc08g007230.1	ERF
Solyc08g007820.1.1	Solyc08g007820.1	ERF
Solyc08g007830.1.1	Solyc08g007830.1	ERF
Solyc08g066660.1.1	Solyc08g066660.1	ERF
Solyc08g078170.1.1	Solyc08g078170.1	ERF
Solyc08g078180.1.1	Solyc08g078180.1	ERF
Solyc08g078190.1.1	Solyc08g078190.1	ERF
Solyc08g078410.1.1	Solyc08g078410.1	ERF
Solyc08g078420.1.1	Solyc08g078420.1	ERF
Solyc08g080290.2.1	Solyc08g080290.2	ERF
Solyc08g081960.1.1	Solyc08g081960.1	ERF
Solyc08g082210.2.1	Solyc08g082210.2	ERF
Solyc09g009240.1.1	Solyc09g009240.1	ERF
Solyc09g059510.2.1	Solyc09g059510.2	ERF
Solyc09g066340.1.1	Solyc09g066340.1	ERF
Solyc09g066350.1.1	Solyc09g066350.1	ERF
Solyc09g066360.1.1	Solyc09g066360.1	ERF
Solyc09g075420.2.1	Solyc09g075420.2	ERF
Solyc09g089910.1.1	Solyc09g089910.1	ERF
Solyc09g089920.1.1	Solyc09g089920.1	ERF
Solyc09g089930.1.1	Solyc09g089930.1	ERF
Solyc09g091950.1.1	Solyc09g091950.1	ERF
Solyc10g006130.1.1	Solyc10g006130.1	ERF
Solyc10g009110.1.1	Solyc10g009110.1	ERF
Solyc10g050970.1.1	Solyc10g050970.1	ERF
Solyc10g076370.1.1	Solyc10g076370.1	ERF
Solyc10g076380.1.1	Solyc10g076380.1	ERF
Solyc10g078610.1.1	Solyc10g078610.1	ERF
Solyc10g080310.1.1	Solyc10g080310.1	ERF
Solyc10g080650.1.1	Solyc10g080650.1	ERF
Solyc10g083560.1.1	Solyc10g083560.1	ERF
Solyc11g006050.1.1	Solyc11g006050.1	ERF
Solyc11g011740.1.1	Solyc11g011740.1	ERF
Solyc11g011750.1.1	Solyc11g011750.1	ERF
Solyc11g012980.1.1	Solyc11g012980.1	ERF
Solyc11g042560.1.1	Solyc11g042560.1	ERF
Solyc11g042580.1.1	Solyc11g042580.1	ERF
Solyc11g045680.1.1	Solyc11g045680.1	ERF
Solyc11g045690.1.1	Solyc11g045690.1	ERF
Solyc12g005960.1.1	Solyc12g005960.1	ERF
Solyc12g008350.1.1	Solyc12g008350.1	ERF
Solyc12g009240.1.1	Solyc12g009240.1	ERF
Solyc12g009490.1.1	Solyc12g009490.1	ERF
Solyc12g013660.1.1	Solyc12g013660.1	ERF
Solyc12g038440.1.1	Solyc12g038440.1	ERF
Solyc12g038450.1.1	Solyc12g038450.1	ERF
Solyc12g042210.1.1	Solyc12g042210.1	ERF
Solyc12g044390.1.1	Solyc12g044390.1	ERF
Solyc12g049560.1.1	Solyc12g049560.1	ERF
Solyc12g056430.1.1	Solyc12g056430.1	ERF
Solyc12g056590.1.1	Solyc12g056590.1	ERF
Solyc12g056980.1.1	Solyc12g056980.1	ERF
Solyc01g110180.2.1	Solyc01g110180.2	DBB
Solyc01g110370.2.1	Solyc01g110370.2	DBB
Solyc02g084420.2.1	Solyc02g084420.2	DBB
Solyc02g089500.2.1	Solyc02g089500.2	DBB
Solyc04g081020.2.1	Solyc04g081020.2	DBB
Solyc06g073180.2.1	Solyc06g073180.2	DBB
Solyc07g062160.2.1	Solyc07g062160.2	DBB
Solyc12g005420.1.1	Solyc12g005420.1	DBB
Solyc12g006240.1.1	Solyc12g006240.1	DBB
Solyc12g089240.1.1	Solyc12g089240.1	DBB
Solyc02g089520.1.1	Solyc02g089520.1	CO-like
Solyc02g089540.2.1	Solyc02g089540.2	CO-like
Solyc03g119540.2.1	Solyc03g119540.2	CO-like
Solyc04g007210.2.1	Solyc04g007210.2	CO-like
Solyc05g009310.2.1	Solyc05g009310.2	CO-like
Solyc05g020020.2.1	Solyc05g020020.2	CO-like
Solyc05g024010.2.1	Solyc05g024010.2	CO-like
Solyc05g046040.1.1	Solyc05g046040.1	CO-like
Solyc07g006630.2.1	Solyc07g006630.2	CO-like
Solyc07g045180.2.1	Solyc07g045180.2	CO-like
Solyc08g006530.2.1	Solyc08g006530.2	CO-like
Solyc09g074560.2.1	Solyc09g074560.2	CO-like
Solyc12g096500.1.1	Solyc12g096500.1	CO-like
Solyc01g065540.2.1	Solyc01g065540.2	ARR-B
Solyc02g031820.1.1	Solyc02g031820.1	ARR-B
Solyc03g026250.1.1	Solyc03g026250.1	ARR-B
Solyc03g083340.1.1	Solyc03g083340.1	ARR-B
Solyc04g008050.2.1	Solyc04g008050.2	ARR-B
Solyc04g051080.1.1	Solyc04g051080.1	ARR-B
Solyc05g014260.2.1	Solyc05g014260.2	ARR-B
Solyc05g054390.2.1	Solyc05g054390.2	ARR-B
Solyc06g061030.2.1	Solyc06g061030.2	ARR-B
Solyc07g005140.2.1	Solyc07g005140.2	ARR-B
Solyc07g009110.1.1	Solyc07g009110.1	ARR-B
Solyc07g009580.1.1	Solyc07g009580.1	ARR-B
Solyc07g019550.1.1	Solyc07g019550.1	ARR-B
Solyc08g077230.2.1	Solyc08g077230.2	ARR-B
Solyc10g050420.1.1	Solyc10g050420.1	ARR-B
Solyc11g066170.1.1	Solyc11g066170.1	ARR-B
Solyc11g066220.1.1	Solyc11g066220.1	ARR-B
Solyc11g066230.1.1	Solyc11g066230.1	ARR-B
Solyc11g072330.1.1	Solyc11g072330.1	ARR-B
Solyc12g010330.1.1	Solyc12g010330.1	ARR-B
Solyc12g099380.1.1	Solyc12g099380.1	ARR-B
Solyc01g091810.1.1	Solyc01g091810.1	G2-like
Solyc01g108300.2.1	Solyc01g108300.2	G2-like
Solyc02g076670.2.1	Solyc02g076670.2	G2-like
Solyc02g080680.1.1	Solyc02g080680.1	G2-like
Solyc02g080710.1.1	Solyc02g080710.1	G2-like
Solyc02g080720.1.1	Solyc02g080720.1	G2-like
Solyc02g080730.1.1	Solyc02g080730.1	G2-like
Solyc02g080740.1.1	Solyc02g080740.1	G2-like
Solyc02g080860.1.1	Solyc02g080860.1	G2-like
Solyc02g090400.2.1	Solyc02g090400.2	G2-like
Solyc03g006150.2.1	Solyc03g006150.2	G2-like
Solyc04g008480.1.1	Solyc04g008480.1	G2-like
Solyc04g015290.2.1	Solyc04g015290.2	G2-like
Solyc04g050070.1.1	Solyc04g050070.1	G2-like
Solyc04g079600.2.1	Solyc04g079600.2	G2-like
Solyc05g007890.2.1	Solyc05g007890.2	G2-like
Solyc05g009720.2.1	Solyc05g009720.2	G2-like
Solyc05g049860.1.1	Solyc05g049860.1	G2-like
Solyc05g051060.2.1	Solyc05g051060.2	G2-like
Solyc05g055940.2.1	Solyc05g055940.2	G2-like
Solyc06g005680.2.1	Solyc06g005680.2	G2-like
Solyc06g008200.2.1	Solyc06g008200.2	G2-like
Solyc06g051060.2.1	Solyc06g051060.2	G2-like
Solyc06g066180.2.1	Solyc06g066180.2	G2-like
Solyc06g066340.2.1	Solyc06g066340.2	G2-like
Solyc06g076350.2.1	Solyc06g076350.2	G2-like
Solyc07g009560.1.1	Solyc07g009560.1	G2-like
Solyc07g017310.1.1	Solyc07g017310.1	G2-like
Solyc07g045000.2.1	Solyc07g045000.2	G2-like
Solyc07g049640.2.1	Solyc07g049640.2	G2-like
Solyc07g053630.2.1	Solyc07g053630.2	G2-like
Solyc08g005260.1.1	Solyc08g005260.1	G2-like
Solyc08g076010.2.1	Solyc08g076010.2	G2-like
Solyc08g076400.2.1	Solyc08g076400.2	G2-like
Solyc09g005030.1.1	Solyc09g005030.1	G2-like
Solyc09g005370.1.1	Solyc09g005370.1	G2-like
Solyc09g010340.1.1	Solyc09g010340.1	G2-like
Solyc09g072830.2.1	Solyc09g072830.2	G2-like
Solyc09g091880.2.1	Solyc09g091880.2	G2-like
Solyc10g008160.2.1	Solyc10g008160.2	G2-like
Solyc10g076460.1.1	Solyc10g076460.1	G2-like
Solyc10g078310.1.1	Solyc10g078310.1	G2-like
Solyc10g078720.1.1	Solyc10g078720.1	G2-like
Solyc10g080460.1.1	Solyc10g080460.1	G2-like
Solyc10g080960.1.1	Solyc10g080960.1	G2-like
Solyc10g083340.1.1	Solyc10g083340.1	G2-like
Solyc10g085620.1.1	Solyc10g085620.1	G2-like
Solyc11g011770.1.1	Solyc11g011770.1	G2-like
Solyc11g019990.1.1	Solyc11g019990.1	G2-like
Solyc11g022470.1.1	Solyc11g022470.1	G2-like
Solyc11g067280.1.1	Solyc11g067280.1	G2-like
Solyc12g006280.1.1	Solyc12g006280.1	G2-like
Solyc12g006800.1.1	Solyc12g006800.1	G2-like
Solyc12g011220.1.1	Solyc12g011220.1	G2-like
Solyc12g011240.1.1	Solyc12g011240.1	G2-like
Solyc12g011250.1.1	Solyc12g011250.1	G2-like
Solyc12g011260.1.1	Solyc12g011260.1	G2-like
Solyc12g017370.1.1	Solyc12g017370.1	G2-like
Solyc12g098370.1.1	Solyc12g098370.1	G2-like
Solyc01g087990.2.1	Solyc01g087990.2	MIKC_MADS
Solyc01g093960.2.1	Solyc01g093960.2	MIKC_MADS
Solyc01g105800.2.1	Solyc01g105800.2	MIKC_MADS
Solyc02g065730.1.1	Solyc02g065730.1	MIKC_MADS
Solyc02g071730.2.1	Solyc02g071730.2	MIKC_MADS
Solyc02g084630.2.1	Solyc02g084630.2	MIKC_MADS
Solyc02g089200.2.1	Solyc02g089200.2	MIKC_MADS
Solyc02g089210.2.1	Solyc02g089210.2	MIKC_MADS
Solyc02g091550.1.1	Solyc02g091550.1	MIKC_MADS
Solyc03g006830.2.1	Solyc03g006830.2	MIKC_MADS
Solyc03g019710.2.1	Solyc03g019710.2	MIKC_MADS
Solyc03g114830.2.1	Solyc03g114830.2	MIKC_MADS
Solyc03g114840.2.1	Solyc03g114840.2	MIKC_MADS
Solyc04g005320.2.1	Solyc04g005320.2	MIKC_MADS
Solyc04g078300.2.1	Solyc04g078300.2	MIKC_MADS
Solyc04g081000.2.1	Solyc04g081000.2	MIKC_MADS
Solyc05g012020.2.1	Solyc05g012020.2	MIKC_MADS
Solyc05g015750.2.1	Solyc05g015750.2	MIKC_MADS
Solyc05g056620.1.1	Solyc05g056620.1	MIKC_MADS
Solyc06g059970.2.1	Solyc06g059970.2	MIKC_MADS
Solyc06g069430.2.1	Solyc06g069430.2	MIKC_MADS
Solyc07g055920.2.1	Solyc07g055920.2	MIKC_MADS
Solyc08g067230.2.1	Solyc08g067230.2	MIKC_MADS
Solyc08g080100.2.1	Solyc08g080100.2	MIKC_MADS
Solyc10g080030.1.1	Solyc10g080030.1	MIKC_MADS
Solyc11g005120.1.1	Solyc11g005120.1	MIKC_MADS
Solyc11g010570.1.1	Solyc11g010570.1	MIKC_MADS
Solyc11g028020.1.1	Solyc11g028020.1	MIKC_MADS
Solyc11g032100.1.1	Solyc11g032100.1	MIKC_MADS
Solyc12g038510.1.1	Solyc12g038510.1	MIKC_MADS
Solyc12g056460.1.1	Solyc12g056460.1	MIKC_MADS
Solyc12g087830.1.1	Solyc12g087830.1	MIKC_MADS
Solyc00g179240.1.1	Solyc00g179240.1	M-type_MADS
Solyc01g010300.1.1	Solyc01g010300.1	M-type_MADS
Solyc01g060300.1.1	Solyc01g060300.1	M-type_MADS
Solyc01g060310.1.1	Solyc01g060310.1	M-type_MADS
Solyc01g066500.1.1	Solyc01g066500.1	M-type_MADS
Solyc01g066730.2.1	Solyc01g066730.2	M-type_MADS
Solyc01g097850.1.1	Solyc01g097850.1	M-type_MADS
Solyc01g098050.1.1	Solyc01g098050.1	M-type_MADS
Solyc01g098060.1.1	Solyc01g098060.1	M-type_MADS
Solyc01g098070.1.1	Solyc01g098070.1	M-type_MADS
Solyc01g102260.2.1	Solyc01g102260.2	M-type_MADS
Solyc01g103550.1.1	Solyc01g103550.1	M-type_MADS
Solyc01g103870.1.1	Solyc01g103870.1	M-type_MADS
Solyc01g106170.2.1	Solyc01g106170.2	M-type_MADS
Solyc01g106700.2.1	Solyc01g106700.2	M-type_MADS
Solyc01g106710.1.1	Solyc01g106710.1	M-type_MADS
Solyc01g106720.1.1	Solyc01g106720.1	M-type_MADS
Solyc01g106730.1.1	Solyc01g106730.1	M-type_MADS
Solyc02g032000.1.1	Solyc02g032000.1	M-type_MADS
Solyc03g007020.1.1	Solyc03g007020.1	M-type_MADS
Solyc03g034260.1.1	Solyc03g034260.1	M-type_MADS
Solyc03g062820.1.1	Solyc03g062820.1	M-type_MADS
Solyc03g115910.1.1	Solyc03g115910.1	M-type_MADS
Solyc03g119680.1.1	Solyc03g119680.1	M-type_MADS
Solyc04g025030.1.1	Solyc04g025030.1	M-type_MADS
Solyc04g025050.1.1	Solyc04g025050.1	M-type_MADS
Solyc04g025110.1.1	Solyc04g025110.1	M-type_MADS
Solyc04g025970.1.1	Solyc04g025970.1	M-type_MADS
Solyc04g047870.1.1	Solyc04g047870.1	M-type_MADS
Solyc04g056550.1.1	Solyc04g056550.1	M-type_MADS
Solyc04g056740.1.1	Solyc04g056740.1	M-type_MADS
Solyc04g064860.1.1	Solyc04g064860.1	M-type_MADS
Solyc04g076680.2.1	Solyc04g076680.2	M-type_MADS
Solyc05g013370.1.1	Solyc05g013370.1	M-type_MADS
Solyc05g015730.1.1	Solyc05g015730.1	M-type_MADS
Solyc05g051830.2.1	Solyc05g051830.2	M-type_MADS
Solyc06g033820.1.1	Solyc06g033820.1	M-type_MADS
Solyc06g033830.1.1	Solyc06g033830.1	M-type_MADS
Solyc06g035570.1.1	Solyc06g035570.1	M-type_MADS
Solyc06g048380.1.1	Solyc06g048380.1	M-type_MADS
Solyc06g054680.1.1	Solyc06g054680.1	M-type_MADS
Solyc06g059780.1.1	Solyc06g059780.1	M-type_MADS
Solyc06g071300.1.1	Solyc06g071300.1	M-type_MADS
Solyc07g052700.2.1	Solyc07g052700.2	M-type_MADS
Solyc09g061950.1.1	Solyc09g061950.1	M-type_MADS
Solyc10g012180.1.1	Solyc10g012180.1	M-type_MADS
Solyc10g012200.1.1	Solyc10g012200.1	M-type_MADS
Solyc10g012380.1.1	Solyc10g012380.1	M-type_MADS
Solyc10g012390.1.1	Solyc10g012390.1	M-type_MADS
Solyc10g017640.1.1	Solyc10g017640.1	M-type_MADS
Solyc10g018070.1.1	Solyc10g018070.1	M-type_MADS
Solyc10g018080.1.1	Solyc10g018080.1	M-type_MADS
Solyc10g018110.1.1	Solyc10g018110.1	M-type_MADS
Solyc10g050900.1.1	Solyc10g050900.1	M-type_MADS
Solyc10g050940.1.1	Solyc10g050940.1	M-type_MADS
Solyc10g050950.1.1	Solyc10g050950.1	M-type_MADS
Solyc11g020320.1.1	Solyc11g020320.1	M-type_MADS
Solyc11g020620.1.1	Solyc11g020620.1	M-type_MADS
Solyc11g020660.1.1	Solyc11g020660.1	M-type_MADS
Solyc11g069770.1.1	Solyc11g069770.1	M-type_MADS
Solyc12g005210.1.1	Solyc12g005210.1	M-type_MADS
Solyc12g016150.1.1	Solyc12g016150.1	M-type_MADS
Solyc12g016170.1.1	Solyc12g016170.1	M-type_MADS
Solyc12g016180.1.1	Solyc12g016180.1	M-type_MADS
Solyc12g017300.1.1	Solyc12g017300.1	M-type_MADS
Solyc12g087820.1.1	Solyc12g087820.1	M-type_MADS
Solyc12g088080.1.1	Solyc12g088080.1	M-type_MADS
Solyc01g091540.1.1	Solyc01g091540.1	GRF
Solyc02g092070.2.1	Solyc02g092070.2	GRF
Solyc03g082430.1.1	Solyc03g082430.1	GRF
Solyc04g077510.2.1	Solyc04g077510.2	GRF
Solyc07g041640.2.1	Solyc07g041640.2	GRF
Solyc08g005430.2.1	Solyc08g005430.2	GRF
Solyc08g068760.1.1	Solyc08g068760.1	GRF
Solyc08g075950.1.1	Solyc08g075950.1	GRF
Solyc08g079800.2.1	Solyc08g079800.2	GRF
Solyc08g083230.1.1	Solyc08g083230.1	GRF
Solyc09g009200.1.1	Solyc09g009200.1	GRF
Solyc10g083510.1.1	Solyc10g083510.1	GRF
Solyc12g096070.1.1	Solyc12g096070.1	GRF
Solyc00g099580.1.1	Solyc00g099580.1	HB-other
Solyc02g077660.2.1	Solyc02g077660.2	HB-other
Solyc04g025740.1.1	Solyc04g025740.1	HB-other
Solyc07g026570.1.1	Solyc07g026570.1	HB-other
Solyc07g053610.2.1	Solyc07g053610.2	HB-other
Solyc08g061140.2.1	Solyc08g061140.2	HB-other
Solyc08g062530.1.1	Solyc08g062530.1	HB-other
Solyc09g015110.1.1	Solyc09g015110.1	HB-other
Solyc09g057550.1.1	Solyc09g057550.1	HB-other
Solyc09g060160.1.1	Solyc09g060160.1	HB-other
Solyc09g066060.1.1	Solyc09g066060.1	HB-other
Solyc09g074690.2.1	Solyc09g074690.2	HB-other
Solyc10g007130.2.1	Solyc10g007130.2	HB-other
Solyc11g065110.1.1	Solyc11g065110.1	HB-other
Solyc12g010410.1.1	Solyc12g010410.1	HB-other
Solyc12g099760.1.1	Solyc12g099760.1	HB-other
Solyc04g078650.2.1	Solyc04g078650.2	WOX
Solyc03g118770.2.1	Solyc03g118770.2	WOX
Solyc02g083950.2.1	Solyc02g083950.2	WOX
Solyc06g076000.1.1	Solyc06g076000.1	WOX
Solyc03g096300.2.1	Solyc03g096300.2	WOX
Solyc02g077390.1.1	Solyc02g077390.1	WOX
Solyc11g072790.1.1	Solyc11g072790.1	WOX
Solyc11g072770.1.1	Solyc11g072770.1	WOX
Solyc06g072890.1.1	Solyc06g072890.1	WOX
Solyc02g082670.2.1	Solyc02g082670.2	WOX
Solyc01g109980.2.1	Solyc01g109980.2	TALE
Solyc04g080790.2.1	Solyc04g080790.2	TALE
Solyc02g089940.2.1	Solyc02g089940.2	TALE
Solyc06g074120.2.1	Solyc06g074120.2	TALE
Solyc11g068950.1.1	Solyc11g068950.1	TALE
Solyc08g081400.2.1	Solyc08g081400.2	TALE
Solyc01g007070.2.1	Solyc01g007070.2	TALE
Solyc04g079830.2.1	Solyc04g079830.2	TALE
Solyc09g011380.2.1	Solyc09g011380.2	TALE
Solyc11g069890.1.1	Solyc11g069890.1	TALE
Solyc04g080780.2.1	Solyc04g080780.2	TALE
Solyc10g086640.1.1	Solyc10g086640.1	TALE
Solyc02g065490.2.1	Solyc02g065490.2	TALE
Solyc08g065420.2.1	Solyc08g065420.2	TALE
Solyc02g086930.2.1	Solyc02g086930.2	HD-ZIP
Solyc05g007180.2.1	Solyc05g007180.2	HD-ZIP
Solyc02g087840.2.1	Solyc02g087840.2	HD-ZIP
Solyc11g010270.1.1	Solyc11g010270.1	HD-ZIP
Solyc08g078300.2.1	Solyc08g078300.2	HD-ZIP
Solyc02g067410.1.1	Solyc02g067410.1	HD-ZIP
Solyc03g113270.2.1	Solyc03g113270.2	HD-ZIP
Solyc10g080540.1.1	Solyc10g080540.1	HD-ZIP
Solyc05g051460.2.1	Solyc05g051460.2	HD-ZIP
Solyc08g007270.2.1	Solyc08g007270.2	HD-ZIP
Solyc01g073910.2.1	Solyc01g073910.2	HD-ZIP
Solyc06g060830.2.1	Solyc06g060830.2	HD-ZIP
Solyc01g090460.2.1	Solyc01g090460.2	HD-ZIP
Solyc01g096320.2.1	Solyc01g096320.2	HD-ZIP
Solyc05g006980.2.1	Solyc05g006980.2	HD-ZIP
Solyc04g074700.2.1	Solyc04g074700.2	HD-ZIP
Solyc02g091930.2.1	Solyc02g091930.2	HD-ZIP
Solyc06g053220.2.1	Solyc06g053220.2	HD-ZIP
Solyc04g005800.2.1	Solyc04g005800.2	HD-ZIP
Solyc02g085630.2.1	Solyc02g085630.2	HD-ZIP
Solyc09g008810.2.1	Solyc09g008810.2	HD-ZIP
Solyc02g062960.2.1	Solyc02g062960.2	HD-ZIP
Solyc04g077220.2.1	Solyc04g077220.2	HD-ZIP
Solyc01g010600.2.1	Solyc01g010600.2	HD-ZIP
Solyc03g082550.2.1	Solyc03g082550.2	HD-ZIP
Solyc07g054380.1.1	Solyc07g054380.1	HD-ZIP
Solyc05g008050.1.1	Solyc05g008050.1	HD-ZIP
Solyc02g063520.2.1	Solyc02g063520.2	HD-ZIP
Solyc03g034110.2.1	Solyc03g034110.2	HD-ZIP
Solyc02g077590.1.1	Solyc02g077590.1	HD-ZIP
Solyc03g034120.2.1	Solyc03g034120.2	HD-ZIP
Solyc03g034130.2.1	Solyc03g034130.2	HD-ZIP
Solyc03g034150.1.1	Solyc03g034150.1	HD-ZIP
Solyc08g083130.2.1	Solyc08g083130.2	HD-ZIP
Solyc07g062790.1.1	Solyc07g062790.1	HD-ZIP
Solyc04g077210.2.1	Solyc04g077210.2	TALE
Solyc02g081120.2.1	Solyc02g081120.2	TALE
Solyc01g100510.2.1	Solyc01g100510.2	TALE
Solyc05g005090.2.1	Solyc05g005090.2	TALE
Solyc07g007120.2.1	Solyc07g007120.2	TALE
Solyc08g041820.2.1	Solyc08g041820.2	TALE
Solyc08g080120.2.1	Solyc08g080120.2	TALE
Solyc02g080260.2.1	Solyc02g080260.2	HD-ZIP
Solyc03g120620.2.1	Solyc03g120620.2	HD-ZIP
Solyc10g005330.2.1	Solyc10g005330.2	HD-ZIP
Solyc01g091630.2.1	Solyc01g091630.2	HD-ZIP
Solyc12g005830.1.1	Solyc12g005830.1	HD-ZIP
Solyc03g098200.2.1	Solyc03g098200.2	HD-ZIP
Solyc08g066500.2.1	Solyc08g066500.2	HD-ZIP
Solyc12g044410.1.1	Solyc12g044410.1	HD-ZIP
Solyc03g120910.2.1	Solyc03g120910.2	HD-ZIP
Solyc06g072310.2.1	Solyc06g072310.2	HD-ZIP
Solyc02g069830.2.1	Solyc02g069830.2	HD-ZIP
Solyc02g024070.2.1	Solyc02g024070.2	HD-ZIP
Solyc06g035940.2.1	Solyc06g035940.2	HD-ZIP
Solyc11g069470.1.1	Solyc11g069470.1	HD-ZIP
Solyc08g076370.2.1	Solyc08g076370.2	HD-ZIP
Solyc03g026070.2.1	Solyc03g026070.2	HD-ZIP
Solyc06g050160.2.1	Solyc06g050160.2	HD-ZIP
Solyc07g041850.1.1	Solyc07g041850.1	HD-ZIP
Solyc08g062510.2.1	Solyc08g062510.2	HD-ZIP
Solyc09g066030.1.1	Solyc09g066030.1	HD-ZIP
Solyc11g011940.1.1	Solyc11g011940.1	HD-ZIP
Solyc10g018000.1.1	Solyc10g018000.1	HD-ZIP
Solyc05g015030.1.1	Solyc05g015030.1	HD-ZIP
Solyc01g107410.2.1	Solyc01g107410.2	HB-PHD
Solyc07g008730.1.1	Solyc07g008730.1	HB-PHD
Solyc00g014800.1.1	Solyc00g014800.1	C2H2
Solyc00g015730.1.1	Solyc00g015730.1	C2H2
Solyc00g110070.1.1	Solyc00g110070.1	C2H2
Solyc01g005060.2.1	Solyc01g005060.2	C2H2
Solyc01g005130.2.1	Solyc01g005130.2	C2H2
Solyc01g005190.1.1	Solyc01g005190.1	C2H2
Solyc01g005200.1.1	Solyc01g005200.1	C2H2
Solyc01g008170.2.1	Solyc01g008170.2	C3H
Solyc01g014850.2.1	Solyc01g014850.2	C3H
Solyc01g058130.1.1	Solyc01g058130.1	C2H2
Solyc01g060420.2.1	Solyc01g060420.2	C2H2
Solyc01g067550.2.1	Solyc01g067550.2	C3H
Solyc01g073940.2.1	Solyc01g073940.2	C3H
Solyc01g081630.2.1	Solyc01g081630.2	C2H2
Solyc01g087030.2.1	Solyc01g087030.2	C3H
Solyc01g087050.2.1	Solyc01g087050.2	C2H2
Solyc01g087170.2.1	Solyc01g087170.2	C3H
Solyc01g090840.2.1	Solyc01g090840.2	C2H2
Solyc01g099340.2.1	Solyc01g099340.2	C2H2
Solyc01g100990.2.1	Solyc01g100990.2	C3H
Solyc01g101250.2.1	Solyc01g101250.2	C2H2
Solyc01g107170.2.1	Solyc01g107170.2	C2H2
Solyc01g110490.2.1	Solyc01g110490.2	C3H
Solyc02g061660.1.1	Solyc02g061660.1	C2H2
Solyc02g061700.1.1	Solyc02g061700.1	C2H2
Solyc02g062940.2.1	Solyc02g062940.2	C2H2
Solyc02g069720.2.1	Solyc02g069720.2	LSD
Solyc02g078270.2.1	Solyc02g078270.2	LSD
Solyc02g082110.2.1	Solyc02g082110.2	C3H
Solyc02g084200.1.1	Solyc02g084200.1	C3H
Solyc02g084520.2.1	Solyc02g084520.2	C3H
Solyc02g085580.2.1	Solyc02g085580.2	C2H2
Solyc02g086430.2.1	Solyc02g086430.2	C3H
Solyc02g088670.1.1	Solyc02g088670.1	C2H2
Solyc02g094170.2.1	Solyc02g094170.2	C2H2
Solyc03g006350.2.1	Solyc03g006350.2	C3H
Solyc03g025440.2.1	Solyc03g025440.2	C2H2
Solyc03g026350.2.1	Solyc03g026350.2	C3H
Solyc03g059270.2.1	Solyc03g059270.2	C2H2
Solyc03g063200.2.1	Solyc03g063200.2	C3H
Solyc03g083310.2.1	Solyc03g083310.2	C2H2
Solyc03g093870.1.1	Solyc03g093870.1	C2H2
Solyc03g095270.1.1	Solyc03g095270.1	C2H2
Solyc03g098070.2.1	Solyc03g098070.2	C2H2
Solyc03g111580.2.1	Solyc03g111580.2	C3H
Solyc03g111590.2.1	Solyc03g111590.2	C2H2
Solyc03g115120.1.1	Solyc03g115120.1	C2H2
Solyc03g115450.1.1	Solyc03g115450.1	C2H2
Solyc03g116410.1.1	Solyc03g116410.1	C3H
Solyc03g116420.1.1	Solyc03g116420.1	C3H
Solyc03g117070.1.1	Solyc03g117070.1	C2H2
Solyc03g121660.2.1	Solyc03g121660.2	C2H2
Solyc04g008500.2.1	Solyc04g008500.2	C2H2
Solyc04g008550.2.1	Solyc04g008550.2	C3H
Solyc04g015570.2.1	Solyc04g015570.2	C2H2
Solyc04g028560.2.1	Solyc04g028560.2	C2H2
Solyc04g056320.1.1	Solyc04g056320.1	C2H2
Solyc04g057990.2.1	Solyc04g057990.2	C3H
Solyc04g064770.1.1	Solyc04g064770.1	C3H
Solyc04g064800.2.1	Solyc04g064800.2	C3H
Solyc04g074250.1.1	Solyc04g074250.1	C2H2
Solyc04g074320.1.1	Solyc04g074320.1	C2H2
Solyc04g077980.1.1	Solyc04g077980.1	C2H2
Solyc04g080130.2.1	Solyc04g080130.2	C2H2
Solyc04g081370.2.1	Solyc04g081370.2	C2H2
Solyc05g006310.1.1	Solyc05g006310.1	C2H2
Solyc05g008670.2.1	Solyc05g008670.2	C3H
Solyc05g009170.1.1	Solyc05g009170.1	C2H2
Solyc05g009350.2.1	Solyc05g009350.2	C3H
Solyc05g009770.1.1	Solyc05g009770.1	C2H2
Solyc05g012490.1.1	Solyc05g012490.1	C2H2
Solyc05g050170.1.1	Solyc05g050170.1	C2H2
Solyc05g050860.1.1	Solyc05g050860.1	C2H2
Solyc05g054030.2.1	Solyc05g054030.2	C2H2
Solyc05g054650.1.1	Solyc05g054650.1	C2H2
Solyc05g054660.1.1	Solyc05g054660.1	C2H2
Solyc05g055500.1.1	Solyc05g055500.1	C2H2
Solyc06g005180.1.1	Solyc06g005180.1	C2H2
Solyc06g008740.2.1	Solyc06g008740.2	C3H
Solyc06g053720.1.1	Solyc06g053720.1	C2H2
Solyc06g054600.2.1	Solyc06g054600.2	C3H
Solyc06g054620.2.1	Solyc06g054620.2	C3H
Solyc06g060740.1.1	Solyc06g060740.1	C2H2
Solyc06g061160.1.1	Solyc06g061160.1	C2H2
Solyc06g062670.2.1	Solyc06g062670.2	C2H2
Solyc06g063020.2.1	Solyc06g063020.2	C3H
Solyc06g065440.1.1	Solyc06g065440.1	C2H2
Solyc06g068390.1.1	Solyc06g068390.1	C2H2
Solyc06g071860.2.1	Solyc06g071860.2	C3H
Solyc06g072360.2.1	Solyc06g072360.2	C2H2
Solyc06g072720.2.1	Solyc06g072720.2	C3H
Solyc06g074360.2.1	Solyc06g074360.2	C2H2
Solyc06g074800.1.1	Solyc06g074800.1	C2H2
Solyc06g075250.2.1	Solyc06g075250.2	C2H2
Solyc06g075780.1.1	Solyc06g075780.1	C2H2
Solyc06g076820.1.1	Solyc06g076820.1	C2H2
Solyc06g082010.2.1	Solyc06g082010.2	C3H
Solyc07g006880.1.1	Solyc07g006880.1	C2H2
Solyc07g053570.2.1	Solyc07g053570.2	C2H2
Solyc07g053750.1.1	Solyc07g053750.1	C3H
Solyc07g063970.2.1	Solyc07g063970.2	C2H2
Solyc07g066160.1.1	Solyc07g066160.1	C2H2
Solyc08g059770.1.1	Solyc08g059770.1	C2H2
Solyc08g063040.2.1	Solyc08g063040.2	C2H2
Solyc08g077000.1.1	Solyc08g077000.1	C2H2
Solyc08g077060.2.1	Solyc08g077060.2	LSD
Solyc08g078590.1.1	Solyc08g078590.1	C2H2
Solyc09g007550.2.1	Solyc09g007550.2	C2H2
Solyc09g008440.1.1	Solyc09g008440.1	C2H2
Solyc09g009120.2.1	Solyc09g009120.2	C2H2
Solyc09g011120.1.1	Solyc09g011120.1	C2H2
Solyc09g065670.2.1	Solyc09g065670.2	C2H2
Solyc09g066250.1.1	Solyc09g066250.1	C2H2
Solyc09g074640.2.1	Solyc09g074640.2	C3H
Solyc09g074780.2.1	Solyc09g074780.2	C2H2
Solyc09g089590.1.1	Solyc09g089590.1	C2H2
Solyc09g089600.1.1	Solyc09g089600.1	C2H2
Solyc09g090260.1.1	Solyc09g090260.1	C2H2
Solyc10g038000.1.1	Solyc10g038000.1	C3H
Solyc10g047040.1.1	Solyc10g047040.1	C3H
Solyc10g049870.1.1	Solyc10g049870.1	C2H2
Solyc10g077110.1.1	Solyc10g077110.1	C2H2
Solyc10g078750.1.1	Solyc10g078750.1	C3H
Solyc10g078970.1.1	Solyc10g078970.1	C2H2
Solyc10g078990.1.1	Solyc10g078990.1	C2H2
Solyc10g079120.1.1	Solyc10g079120.1	C3H
Solyc10g080200.1.1	Solyc10g080200.1	C2H2
Solyc10g080260.1.1	Solyc10g080260.1	C3H
Solyc10g080480.1.1	Solyc10g080480.1	C3H
Solyc10g084180.1.1	Solyc10g084180.1	C2H2
Solyc10g084910.1.1	Solyc10g084910.1	C2H2
Solyc10g085560.1.1	Solyc10g085560.1	C2H2
Solyc11g008900.1.1	Solyc11g008900.1	C3H
Solyc11g011890.1.1	Solyc11g011890.1	C2H2
Solyc11g017140.1.1	Solyc11g017140.1	C2H2
Solyc11g062060.1.1	Solyc11g062060.1	C2H2
Solyc11g066400.1.1	Solyc11g066400.1	C2H2
Solyc11g066420.1.1	Solyc11g066420.1	C2H2
Solyc11g069240.1.1	Solyc11g069240.1	C2H2
Solyc11g069340.1.1	Solyc11g069340.1	C3H
Solyc11g070070.1.1	Solyc11g070070.1	C3H
Solyc11g072210.1.1	Solyc11g072210.1	C2H2
Solyc11g073060.1.1	Solyc11g073060.1	C2H2
Solyc12g005770.1.1	Solyc12g005770.1	C3H
Solyc12g008660.1.1	Solyc12g008660.1	C3H
Solyc12g008870.1.1	Solyc12g008870.1	C3H
Solyc12g009390.1.1	Solyc12g009390.1	C3H
Solyc12g017410.1.1	Solyc12g017410.1	C3H
Solyc12g040230.1.1	Solyc12g040230.1	C3H
Solyc12g088390.1.1	Solyc12g088390.1	C2H2
Solyc01g005660.1.1	Solyc01g005660.1	MYB
Solyc01g009070.2.1	Solyc01g009070.2	MYB
Solyc01g010910.1.1	Solyc01g010910.1	MYB
Solyc01g057910.2.1	Solyc01g057910.2	MYB
Solyc01g079620.2.1	Solyc01g079620.2	MYB
Solyc01g087130.2.1	Solyc01g087130.2	MYB
Solyc01g090530.1.1	Solyc01g090530.1	MYB
Solyc01g094360.2.1	Solyc01g094360.2	MYB
Solyc01g102340.2.1	Solyc01g102340.2	MYB
Solyc01g111500.2.1	Solyc01g111500.2	MYB
Solyc02g067340.2.1	Solyc02g067340.2	MYB
Solyc02g067760.2.1	Solyc02g067760.2	MYB
Solyc02g079280.2.1	Solyc02g079280.2	MYB
Solyc02g082040.2.1	Solyc02g082040.2	MYB
Solyc02g087960.2.1	Solyc02g087960.2	MYB
Solyc02g088190.2.1	Solyc02g088190.2	MYB
Solyc02g089190.1.1	Solyc02g089190.1	MYB
Solyc02g091980.1.1	Solyc02g091980.1	MYB
Solyc02g092930.1.1	Solyc02g092930.1	MYB
Solyc02g093740.2.1	Solyc02g093740.2	MYB
Solyc03g005570.2.1	Solyc03g005570.2	MYB
Solyc03g025870.2.1	Solyc03g025870.2	MYB
Solyc03g059200.1.1	Solyc03g059200.1	MYB
Solyc03g093890.2.1	Solyc03g093890.2	MYB
Solyc03g093930.2.1	Solyc03g093930.2	MYB
Solyc03g093940.1.1	Solyc03g093940.1	MYB
Solyc03g096350.2.1	Solyc03g096350.2	MYB
Solyc03g112390.2.1	Solyc03g112390.2	MYB
Solyc03g112890.1.1	Solyc03g112890.1	MYB
Solyc03g116100.2.1	Solyc03g116100.2	MYB
Solyc03g119050.2.1	Solyc03g119050.2	MYB
Solyc03g119370.1.1	Solyc03g119370.1	MYB
Solyc03g119740.2.1	Solyc03g119740.2	MYB
Solyc03g121740.1.1	Solyc03g121740.1	MYB
Solyc04g005600.1.1	Solyc04g005600.1	MYB
Solyc04g005710.1.1	Solyc04g005710.1	MYB
Solyc04g008870.2.1	Solyc04g008870.2	MYB
Solyc04g009950.2.1	Solyc04g009950.2	MYB
Solyc04g014470.2.1	Solyc04g014470.2	MYB
Solyc04g049120.2.1	Solyc04g049120.2	MYB
Solyc04g049740.1.1	Solyc04g049740.1	MYB
Solyc04g050090.1.1	Solyc04g050090.1	MYB
Solyc04g056310.2.1	Solyc04g056310.2	MYB
Solyc04g064540.2.1	Solyc04g064540.2	MYB
Solyc04g074170.1.1	Solyc04g074170.1	MYB
Solyc04g077260.2.1	Solyc04g077260.2	MYB
Solyc04g078420.1.1	Solyc04g078420.1	MYB
Solyc04g079360.1.1	Solyc04g079360.1	MYB
Solyc05g007160.2.1	Solyc05g007160.2	MYB
Solyc05g007690.1.1	Solyc05g007690.1	MYB
Solyc05g007710.2.1	Solyc05g007710.2	MYB
Solyc05g007870.1.1	Solyc05g007870.1	MYB
Solyc05g008250.1.1	Solyc05g008250.1	MYB
Solyc05g009230.1.1	Solyc05g009230.1	MYB
Solyc05g013430.1.1	Solyc05g013430.1	MYB
Solyc05g014290.2.1	Solyc05g014290.2	MYB
Solyc05g048830.2.1	Solyc05g048830.2	MYB
Solyc05g051550.1.1	Solyc05g051550.1	MYB
Solyc05g052850.2.1	Solyc05g052850.2	MYB
Solyc05g053150.1.1	Solyc05g053150.1	MYB
Solyc05g053330.2.1	Solyc05g053330.2	MYB
Solyc05g055030.1.1	Solyc05g055030.1	MYB
Solyc05g055240.2.1	Solyc05g055240.2	MYB
Solyc06g005330.2.1	Solyc06g005330.2	MYB
Solyc06g009410.1.1	Solyc06g009410.1	MYB
Solyc06g009480.1.1	Solyc06g009480.1	MYB
Solyc06g009710.2.1	Solyc06g009710.2	MYB
Solyc06g033870.1.1	Solyc06g033870.1	MYB
Solyc06g034000.1.1	Solyc06g034000.1	MYB
Solyc06g053610.2.1	Solyc06g053610.2	MYB
Solyc06g065100.2.1	Solyc06g065100.2	MYB
Solyc06g069850.2.1	Solyc06g069850.2	MYB
Solyc06g071520.1.1	Solyc06g071520.1	MYB
Solyc06g071690.2.1	Solyc06g071690.2	MYB
Solyc06g073640.2.1	Solyc06g073640.2	MYB
Solyc06g074910.2.1	Solyc06g074910.2	MYB
Solyc06g074920.1.1	Solyc06g074920.1	MYB
Solyc06g076770.2.1	Solyc06g076770.2	MYB
Solyc06g076840.1.1	Solyc06g076840.1	MYB
Solyc06g083900.2.1	Solyc06g083900.2	MYB
Solyc07g006750.2.1	Solyc07g006750.2	MYB
Solyc07g008010.2.1	Solyc07g008010.2	MYB
Solyc07g052300.2.1	Solyc07g052300.2	MYB
Solyc07g053230.2.1	Solyc07g053230.2	MYB
Solyc07g053240.2.1	Solyc07g053240.2	MYB
Solyc07g054840.2.1	Solyc07g054840.2	MYB
Solyc07g054960.1.1	Solyc07g054960.1	MYB
Solyc07g054980.1.1	Solyc07g054980.1	MYB
Solyc07g055000.1.1	Solyc07g055000.1	MYB
Solyc08g005870.1.1	Solyc08g005870.1	MYB
Solyc08g008480.2.1	Solyc08g008480.2	MYB
Solyc08g065910.1.1	Solyc08g065910.1	MYB
Solyc08g068320.2.1	Solyc08g068320.2	MYB
Solyc08g076700.1.1	Solyc08g076700.1	MYB
Solyc08g076710.2.1	Solyc08g076710.2	MYB
Solyc08g079270.2.1	Solyc08g079270.2	MYB
Solyc08g080580.2.1	Solyc08g080580.2	MYB
Solyc08g081500.1.1	Solyc08g081500.1	MYB
Solyc08g082890.2.1	Solyc08g082890.2	MYB
Solyc09g008250.2.1	Solyc09g008250.2	MYB
Solyc09g008390.1.1	Solyc09g008390.1	MYB
Solyc09g010820.2.1	Solyc09g010820.2	MYB
Solyc09g010840.1.1	Solyc09g010840.1	MYB
Solyc09g011780.2.1	Solyc09g011780.2	MYB
Solyc09g014250.2.1	Solyc09g014250.2	MYB
Solyc09g055650.1.1	Solyc09g055650.1	MYB
Solyc09g090130.2.1	Solyc09g090130.2	MYB
Solyc09g090790.2.1	Solyc09g090790.2	MYB
Solyc10g005240.2.1	Solyc10g005240.2	MYB
Solyc10g005460.2.1	Solyc10g005460.2	MYB
Solyc10g005550.1.1	Solyc10g005550.1	MYB
Solyc10g005760.1.1	Solyc10g005760.1	MYB
Solyc10g008700.1.1	Solyc10g008700.1	MYB
Solyc10g019260.1.1	Solyc10g019260.1	MYB
Solyc10g044680.1.1	Solyc10g044680.1	MYB
Solyc10g055410.1.1	Solyc10g055410.1	MYB
Solyc10g076820.1.1	Solyc10g076820.1	MYB
Solyc10g081320.1.1	Solyc10g081320.1	MYB
Solyc10g081490.1.1	Solyc10g081490.1	MYB
Solyc10g083900.1.1	Solyc10g083900.1	MYB
Solyc10g086250.1.1	Solyc10g086250.1	MYB
Solyc10g086260.1.1	Solyc10g086260.1	MYB
Solyc10g086270.1.1	Solyc10g086270.1	MYB
Solyc10g086290.1.1	Solyc10g086290.1	MYB
Solyc11g006720.1.1	Solyc11g006720.1	MYB
Solyc11g011050.1.1	Solyc11g011050.1	MYB
Solyc11g065840.1.1	Solyc11g065840.1	MYB
Solyc11g069030.1.1	Solyc11g069030.1	MYB
Solyc11g071300.1.1	Solyc11g071300.1	MYB
Solyc11g071500.1.1	Solyc11g071500.1	MYB
Solyc11g072060.1.1	Solyc11g072060.1	MYB
Solyc11g073120.1.1	Solyc11g073120.1	MYB
Solyc12g005640.1.1	Solyc12g005640.1	MYB
Solyc12g008670.1.1	Solyc12g008670.1	MYB
Solyc12g049300.1.1	Solyc12g049300.1	MYB
Solyc12g049350.1.1	Solyc12g049350.1	MYB
Solyc12g096200.1.1	Solyc12g096200.1	MYB
Solyc12g099120.1.1	Solyc12g099120.1	MYB
Solyc12g099130.1.1	Solyc12g099130.1	MYB
Solyc12g099140.1.1	Solyc12g099140.1	MYB
Solyc01g009650.1.1	Solyc01g009650.1	MYB_related
Solyc01g016770.1.1	Solyc01g016770.1	MYB_related
Solyc01g067560.2.1	Solyc01g067560.2	MYB_related
Solyc01g073950.2.1	Solyc01g073950.2	MYB_related
Solyc01g079210.2.1	Solyc01g079210.2	MYB_related
Solyc01g095030.2.1	Solyc01g095030.2	MYB_related
Solyc01g095640.1.1	Solyc01g095640.1	MYB_related
Solyc01g096700.2.1	Solyc01g096700.2	MYB_related
Solyc01g106940.2.1	Solyc01g106940.2	MYB_related
Solyc01g109690.1.1	Solyc01g109690.1	MYB_related
Solyc02g036370.2.1	Solyc02g036370.2	MYB_related
Solyc02g064630.2.1	Solyc02g064630.2	MYB_related
Solyc02g078810.2.1	Solyc02g078810.2	MYB_related
Solyc02g081640.2.1	Solyc02g081640.2	MYB_related
Solyc02g082380.1.1	Solyc02g082380.1	MYB_related
Solyc02g082390.1.1	Solyc02g082390.1	MYB_related
Solyc02g086690.2.1	Solyc02g086690.2	MYB_related
Solyc03g098260.1.1	Solyc03g098260.1	MYB_related
Solyc03g098320.2.1	Solyc03g098320.2	MYB_related
Solyc03g113530.2.1	Solyc03g113530.2	MYB_related
Solyc03g113620.2.1	Solyc03g113620.2	MYB_related
Solyc03g115440.1.1	Solyc03g115440.1	MYB_related
Solyc03g121840.2.1	Solyc03g121840.2	MYB_related
Solyc03g121990.2.1	Solyc03g121990.2	MYB_related
Solyc04g005100.2.1	Solyc04g005100.2	MYB_related
Solyc04g011650.2.1	Solyc04g011650.2	MYB_related
Solyc04g050000.1.1	Solyc04g050000.1	MYB_related
Solyc04g050080.1.1	Solyc04g050080.1	MYB_related
Solyc04g050100.1.1	Solyc04g050100.1	MYB_related
Solyc04g076360.2.1	Solyc04g076360.2	MYB_related
Solyc04g080500.2.1	Solyc04g080500.2	MYB_related
Solyc05g013420.1.1	Solyc05g013420.1	MYB_related
Solyc05g052610.2.1	Solyc05g052610.2	MYB_related
Solyc06g005310.2.1	Solyc06g005310.2	MYB_related
Solyc06g005590.2.1	Solyc06g005590.2	MYB_related
Solyc06g009430.1.1	Solyc06g009430.1	MYB_related
Solyc06g034030.2.1	Solyc06g034030.2	MYB_related
Solyc06g036300.2.1	Solyc06g036300.2	MYB_related
Solyc06g069560.1.1	Solyc06g069560.1	MYB_related
Solyc06g071230.2.1	Solyc06g071230.2	MYB_related
Solyc06g075660.2.1	Solyc06g075660.2	MYB_related
Solyc06g075670.1.1	Solyc06g075670.1	MYB_related
Solyc06g076270.2.1	Solyc06g076270.2	MYB_related
Solyc06g082510.2.1	Solyc06g082510.2	MYB_related
Solyc07g026680.2.1	Solyc07g026680.2	MYB_related
Solyc07g040920.2.1	Solyc07g040920.2	MYB_related
Solyc07g052490.2.1	Solyc07g052490.2	MYB_related
Solyc08g065380.2.1	Solyc08g065380.2	MYB_related
Solyc08g066190.1.1	Solyc08g066190.1	MYB_related
Solyc08g078340.2.1	Solyc08g078340.2	MYB_related
Solyc09g007570.1.1	Solyc09g007570.1	MYB_related
Solyc09g007580.1.1	Solyc09g007580.1	MYB_related
Solyc09g007990.2.1	Solyc09g007990.2	MYB_related
Solyc09g008100.2.1	Solyc09g008100.2	MYB_related
Solyc10g005080.2.1	Solyc10g005080.2	MYB_related
Solyc10g019150.1.1	Solyc10g019150.1	MYB_related
Solyc10g052470.1.1	Solyc10g052470.1	MYB_related
Solyc10g080300.1.1	Solyc10g080300.1	MYB_related
Solyc10g080920.1.1	Solyc10g080920.1	MYB_related
Solyc10g084370.1.1	Solyc10g084370.1	MYB_related
Solyc11g013560.1.1	Solyc11g013560.1	MYB_related
Solyc11g013620.1.1	Solyc11g013620.1	MYB_related
Solyc11g017360.1.1	Solyc11g017360.1	MYB_related
Solyc11g039750.1.1	Solyc11g039750.1	MYB_related
Solyc11g044320.1.1	Solyc11g044320.1	MYB_related
Solyc11g050730.1.1	Solyc11g050730.1	MYB_related
Solyc11g069850.1.1	Solyc11g069850.1	MYB_related
Solyc12g005890.1.1	Solyc12g005890.1	MYB_related
Solyc12g008800.1.1	Solyc12g008800.1	MYB_related
Solyc12g019810.1.1	Solyc12g019810.1	MYB_related
Solyc12g019820.1.1	Solyc12g019820.1	MYB_related
Solyc12g019840.1.1	Solyc12g019840.1	MYB_related
Solyc12g019900.1.1	Solyc12g019900.1	MYB_related
Solyc12g019910.1.1	Solyc12g019910.1	MYB_related
Solyc12g044610.1.1	Solyc12g044610.1	MYB_related
Solyc12g087970.1.1	Solyc12g087970.1	MYB_related
Solyc12g088610.1.1	Solyc12g088610.1	MYB_related
Solyc12g089170.1.1	Solyc12g089170.1	MYB_related
Solyc12g089190.1.1	Solyc12g089190.1	MYB_related

## Sheet: S 1
Table S1 - Abiotic samples combined meta-analysis (by Fisher)
	ID	Fisher
	LES.3267.3.A1_AT	2.95e-20
	LES.1606.1.S1_AT	2.95e-20
	LES.3969.1.S1_AT	2.95e-20
	LES.1399.1.A1_AT	2.95e-20
	LES.4519.2.S1_AT	2.95e-20
	LES.292.1.S1_AT	2.95e-20
	LES.4769.1.S1_AT	2.95e-20
	LES.4834.1.S1_AT	2.95e-20
	LES.4794.1.S1_AT	2.95e-20
	LES.1781.1.S1_A_AT	2.95e-20
	LES.3449.1.S1_AT	2.95e-20
	LES.3733.1.S1_AT	2.95e-20
	LES.4621.1.S1_AT	2.95e-20
	LES.2831.1.S1_AT	2.95e-20
	LES.4594.1.S1_AT	2.95e-20
	LES.1721.1.A1_AT	2.95e-20
	LES.5090.1.S1_AT	2.95e-20
	LES.4483.1.S1_AT	2.95e-20
	LES.2508.1.A1_AT	2.95e-20
	LES.827.1.S1_AT	2.95e-20
	LES.1020.2.A1_AT	2.95e-20
	LES.3168.1.S1_AT	2.95e-20
	LES.2490.1.S1_AT	2.95e-20
	LES.5410.1.S1_AT	2.95e-20
	LES.3418.2.S1_A_AT	2.95e-20
	LES.3697.1.S1_AT	2.95e-20
	LES.2747.2.S1_AT	2.95e-20
	LES.3725.1.S1_AT	2.95e-20
	LES.2325.1.S1_AT	2.95e-20
	LES.2073.3.A1_AT	2.95e-20
	LES.2567.1.S1_AT	2.95e-20
	LES.3495.1.S1_AT	2.95e-20
	LES.5579.1.S1_AT	2.95e-20
	LES.4651.1.S1_AT	2.95e-20
	LES.5607.1.S1_AT	2.95e-20
	LES.1129.1.S1_AT	2.95e-20
	LES.1288.1.S1_AT	2.95e-20
	LES.963.3.A1_AT	2.95e-20
	LES.53.1.S1_AT	2.95e-20
	LES.1020.1.A1_A_AT	2.95e-20
	LES.2182.1.A1_AT	2.95e-20
	LES.3555.1.S1_AT	2.95e-20
	LES.2189.1.S1_AT	2.95e-20
	LES.4710.1.S1_AT	2.95e-20
	LES.4263.1.S1_AT	2.95e-20
	LES.4300.2.S1_AT	2.95e-20
	LES.4300.3.S1_AT	2.95e-20
	LES.3030.1.A1_AT	2.95e-20
	LES.2703.1.S1_AT	2.95e-20
	LES.5696.1.S1_AT	2.95e-20
	LES.3094.2.S1_AT	2.95e-20
	LES.2517.1.A1_AT	2.95e-20
	LES.1583.1.S1_AT	2.95e-20
	LES.2481.1.S1_AT	2.95e-20
	LES.502.3.A1_AT	2.95e-20
	LES.5960.1.S1_AT	2.95e-20
	LES.444.1.S1_AT	2.95e-20
	LES.5576.1.S1_AT	2.95e-20
	LES.2989.1.S1_AT	2.95e-20
	LES.5290.1.S1_AT	2.95e-20
	LES.2425.1.S1_AT	2.95e-20
	LES.4681.1.S1_AT	2.95e-20
	LES.1437.1.A1_AT	2.95e-20
	LES.2335.1.A1_AT	2.95e-20
	LES.4849.1.S1_AT	2.95e-20
	LES.1811.1.S1_AT	2.95e-20
	LES.3011.1.S1_AT	2.95e-20
	LES.4811.1.S1_AT	2.95e-20
	LES.2667.3.S1_AT	2.95e-20
	LES.2123.1.A1_AT	2.95e-20
	LES.3092.1.S1_AT	2.95e-20
	LES.414.1.S1_AT	2.95e-20
	LES.2517.2.S1_AT	2.95e-20
	LES.2500.2.S1_AT	2.95e-20
	LES.1610.1.S1_AT	2.95e-20
	LES.839.1.S1_AT	2.95e-20
	LES.4613.1.S1_AT	2.95e-20
	LES.3199.1.S1_AT	2.95e-20
	LES.3354.2.S1_AT	2.95e-20
	LES.4564.1.S1_AT	2.95e-20
	LES.5156.1.S1_AT	2.95e-20
	LES.2271.1.S1_AT	2.95e-20
	LES.4470.1.S1_AT	2.95e-20
	LES.5865.1.S1_AT	2.95e-20
	LES.3279.2.S1_AT	2.95e-20
	LES.3286.1.S1_AT	2.95e-20
	LES.4695.1.S1_AT	2.95e-20
	LES.3410.1.S1_AT	2.95e-20
	LES.4523.1.S1_AT	2.95e-20
	LES.4774.1.S1_AT	2.95e-20
	LES.928.1.S1_AT	2.95e-20
	LES.3117.1.S1_AT	2.95e-20
	LES.5131.1.S1_AT	2.95e-20
	LES.22.1.S1_AT	2.95e-20
	LES.3678.1.S1_AT	2.95e-20
	LES.2546.2.S1_AT	2.95e-20
	LES.119.1.S1_AT	2.95e-20
	LES.3358.2.S1_AT	2.95e-20
	LES.2943.1.S1_AT	2.95e-20
	LES.1212.1.S1_AT	2.95e-20
	LES.4709.1.S1_AT	2.95e-20
	LES.4476.1.S1_AT	2.95e-20
	LES.56.1.S1_AT	2.95e-20
	LES.5787.1.S1_AT	2.95e-20
	LES.3456.1.S1_AT	2.95e-20
	LES.4756.1.S1_AT	2.95e-20
	LES.3323.1.S1_AT	2.95e-20
	LES.3176.2.S1_AT	2.95e-20
	LES.2494.1.S1_AT	2.95e-20
	LES.3300.1.S1_AT	2.95e-20
	LES.3358.1.S1_A_AT	2.95e-20
	LES.2073.1.S1_AT	2.95e-20
	LES.1248.2.S1_A_AT	2.95e-20
	LES.4224.1.A1_AT	2.95e-20
	LES.3317.1.S1_AT	2.95e-20
	LES.3385.2.S1_AT	2.95e-20
	LES.2578.1.S1_AT	2.95e-20
	LES.1779.1.S1_AT	2.95e-20
	LES.2200.1.S1_AT	2.95e-20
	LES.4891.1.S1_AT	2.95e-20
	LES.1859.2.S1_AT	2.95e-20
	LES.477.1.S1_A_AT	2.95e-20
	LES.170.1.S1_AT	2.95e-20
	LES.3418.1.S1_AT	2.95e-20
	LES.3018.1.S1_AT	2.95e-20
	LES.122.1.S1_AT	2.95e-20
	LES.3671.1.S1_AT	2.95e-20
	LES.3225.3.S1_AT	2.95e-20
	LES.85.1.S1_AT	2.95e-20
	LES.186.1.S1_AT	2.95e-20
	LES.874.1.A1_AT	2.95e-20
	LES.4986.1.S1_AT	2.95e-20
	LES.651.1.S1_AT	2.95e-20
	LES.4786.1.S1_AT	2.95e-20
	LES.3672.1.S1_AT	2.95e-20
	LES.253.1.S1_AT	2.95e-20
	LES.5244.1.S1_AT	2.95e-20
	LES.327.1.S1_AT	2.95e-20
	LES.1393.2.A1_AT	2.95e-20
	LES.167.1.S1_AT	2.95e-20
	LES.3084.1.S1_AT	2.95e-20
	LES.3060.1.S1_AT	2.95e-20
	LES.2992.1.S1_A_AT	2.95e-20
	LES.2502.3.A1_A_AT	2.95e-20
	LES.2648.1.S1_AT	2.95e-20
	LES.3714.1.S1_AT	2.95e-20
	LES.4680.1.S1_AT	2.95e-20
	LES.4526.1.S1_AT	2.95e-20
	LES.5395.1.S1_AT	2.95e-20
	LES.173.1.S1_AT	2.95e-20
	LES.5268.1.S1_AT	2.95e-20
	LES.5545.1.S1_AT	2.95e-20
	LES.3406.1.S1_AT	2.95e-20
	LES.135.1.S1_AT	2.95e-20
	LES.5105.1.S1_AT	2.95e-20
	LES.3094.3.S1_AT	2.95e-20
	LES.5678.1.S1_AT	2.95e-20
	LES.812.3.A1_AT	2.95e-20
	LES.2012.1.S1_AT	2.95e-20
	LES.1675.1.S2_AT	2.95e-20
	LES.3180.3.A1_AT	2.95e-20
	LES.2560.1.S1_AT	2.95e-20
	LES.2229.1.S1_AT	2.95e-20
	LES.3774.1.S1_AT	2.95e-20
	LES.3202.1.S1_AT	2.95e-20
	LES.3214.1.S1_AT	2.95e-20
	LES.3037.2.A1_AT	2.95e-20
	LES.3126.1.S1_AT	2.95e-20
	LES.4770.1.S1_AT	2.95e-20
	LES.3037.1.S1_AT	2.95e-20
	LES.3330.2.S1_AT	2.95e-20
	LES.68.2.S1_A_AT	2.95e-20
	LES.3251.2.S1_AT	2.95e-20
	LES.2733.1.S1_AT	2.95e-20
	LES.1478.1.S1_AT	2.95e-20
	LES.1781.1.S1_AT	2.95e-20
	LES.5610.1.S1_AT	2.95e-20
	LES.5755.1.S1_AT	2.95e-20
	LES.4345.4.A1_AT	2.95e-20
	LES.2496.2.S1_AT	2.95e-20
	LES.5831.1.S1_AT	2.95e-20
	LES.157.1.S1_AT	2.95e-20
	LES.3674.1.S1_AT	2.95e-20
	LES.5880.1.S1_AT	2.95e-20
	LES.5014.1.S1_AT	2.95e-20
	LES.3306.2.S1_AT	2.95e-20
	LES.2767.1.S1_AT	2.95e-20
	LES.2247.1.A1_AT	2.95e-20
	LES.5341.1.S1_AT	2.95e-20
	LES.3546.1.S1_AT	2.95e-20
	LES.3358.1.S1_AT	2.95e-20
	LES.314.2.S1_AT	2.95e-20
	LES.4591.1.S1_AT	2.95e-20
	LES.1923.1.S1_AT	2.95e-20
	LES.4577.1.S1_AT	2.95e-20
	LES.1493.1.S1_AT	2.95e-20
	LES.162.2.S1_AT	2.95e-20
	LES.275.1.S1_AT	2.95e-20
	LES.4187.1.S1_AT	2.95e-20
	LES.2014.1.A1_AT	2.95e-20
	LES.3024.1.A1_AT	2.95e-20
	LES.5021.1.S1_AT	2.95e-20
	LES.1401.1.S1_AT	2.95e-20
	LES.934.1.S1_AT	2.95e-20
	LES.5824.1.S1_AT	2.95e-20
	LES.3666.1.S1_AT	2.95e-20
	LES.4520.1.S1_AT	2.95e-20
	LES.3618.1.S1_AT	2.95e-20
	LES.2938.1.S1_AT	2.95e-20
	LES.2938.3.A1_AT	2.95e-20
	LES.4731.1.S1_AT	2.95e-20
	LES.1699.1.A1_AT	2.95e-20
	LES.5584.1.S1_AT	2.95e-20
	LES.4442.1.S1_S_AT	2.95e-20
	LES.1049.1.S1_AT	2.95e-20
	LES.4824.1.S1_AT	2.95e-20
	LES.2943.2.S1_AT	2.95e-20
	LES.5957.1.S1_AT	2.95e-20
	LES.3590.1.S1_AT	2.95e-20
	LES.3250.1.A1_AT	2.95e-20
	LES.5558.1.S1_AT	2.95e-20
	LES.5480.1.S1_AT	2.95e-20
	LES.2667.2.S1_AT	2.95e-20
	LES.3467.1.S1_AT	2.95e-20
	LES.3573.1.S1_AT	2.95e-20
	LES.2369.1.S1_AT	2.95e-20
	LES.1802.1.A1_AT	2.95e-20
	LES.4802.1.S1_AT	2.95e-20
	LES.2508.2.S1_AT	2.95e-20
	LES.5020.1.S1_AT	2.95e-20
	LES.5078.1.S1_AT	2.95e-20
	LES.2769.1.A1_AT	2.95e-20
	LES.4426.2.S1_S_AT	2.95e-20
	LES.3225.2.S1_AT	2.95e-20
	LES.3569.1.S1_AT	2.95e-20
	LES.4807.1.S1_AT	2.95e-20
	LES.2360.1.S1_AT	2.95e-20
	LES.3180.2.S1_AT	2.95e-20
	LES.1708.1.S1_AT	2.95e-20
	LES.4738.1.S1_AT	2.95e-20
	LES.3301.1.S1_AT	2.95e-20
	LES.3301.3.S1_AT	2.95e-20
	LES.4983.1.S1_AT	2.95e-20
	LES.3113.2.S1_AT	2.95e-20
	LES.5573.1.S1_AT	2.95e-20
	LES.4361.1.S1_AT	2.95e-20
	LES.4923.1.S1_AT	2.95e-20
	LES.266.1.S1_AT	2.95e-20
	LES.842.2.S1_A_AT	2.95e-20
	LES.4773.1.S1_AT	2.95e-20
	LES.1434.2.A1_AT	2.95e-20
	LES.3330.3.A1_AT	2.95e-20
	LES.5840.1.S1_AT	2.95e-20
	LES.4674.1.S1_AT	2.95e-20
	LES.3632.1.S1_AT	2.95e-20
	LES.4991.1.S1_AT	2.95e-20
	LES.4628.1.S1_AT	2.95e-20
	LES.2892.1.S1_AT	2.95e-20
	LES.4611.1.S1_AT	2.95e-20
	LES.775.1.S1_AT	2.95e-20
	LES.5086.1.S1_AT	2.95e-20
	LES.112.1.S1_AT	2.95e-20
	LES.5228.1.A1_AT	2.95e-20
	LES.2949.1.S1_AT	2.95e-20
	LES.5296.1.S1_AT	2.95e-20
	LES.3010.1.S1_AT	2.95e-20
	LES.1324.1.S1_AT	2.95e-20
	LES.3598.1.S1_AT	2.95e-20
	LES.2719.2.S1_AT	2.95e-20
	LES.4635.1.S1_AT	2.95e-20
	LES.2494.2.A1_AT	2.95e-20
	LES.5345.1.S1_AT	2.95e-20
	LES.4469.1.A1_AT	2.95e-20
	LES.5195.1.S1_AT	2.95e-20
	LES.2024.2.S1_AT	2.95e-20
	LES.4655.1.S1_AT	2.95e-20
	LES.4791.1.S1_AT	2.95e-20
	LES.5311.1.S1_AT	2.95e-20
	LES.2476.1.S1_AT	2.95e-20
	LES.4300.1.A1_AT	2.95e-20
	LES.80.1.S1_AT	2.95e-20
	LES.564.1.S1_AT	2.95e-20
	LES.799.1.A1_AT	2.95e-20
	LES.3510.1.S1_AT	2.95e-20
	LES.4819.1.S1_AT	2.95e-20
	LES.1174.1.S1_AT	2.95e-20
	LES.5219.1.S1_AT	2.95e-20
	LES.3045.1.S1_AT	2.95e-20
	LES.2915.1.A1_AT	2.95e-20
	LES.2163.1.A1_AT	2.95e-20
	LES.652.1.S1_AT	2.95e-20
	LES.3279.1.A1_AT	2.95e-20
	LES.1401.2.S1_AT	2.95e-20
	LES.5952.1.S1_AT	2.95e-20
	LES.5930.1.S1_AT	2.95e-20
	LES.1393.1.S1_AT	2.95e-20
	LES.3687.1.S1_AT	2.95e-20
	LES.5318.1.S1_AT	2.95e-20
	LES.2583.1.S1_AT	2.95e-20
	LES.1603.1.A1_AT	2.95e-20
	LES.5275.1.S1_AT	2.95e-20
	LES.127.1.S1_AT	2.95e-20
	LES.3072.3.S1_AT	2.95e-20
	LES.32.1.S1_AT	2.95e-20
	LES.5540.1.S1_AT	2.95e-20
	LES.1972.1.S1_AT	2.95e-20
	LES.1819.1.A1_A_AT	2.95e-20
	LES.1819.1.A1_AT	2.95e-20
	LES.354.1.S1_AT	2.95e-20
	LES.314.1.A1_AT	2.95e-20
	LES.1596.1.A1_AT	2.95e-20
	LES.3095.1.S1_AT	2.95e-20
	LES.4139.1.S1_AT	2.95e-20
	LES.3072.1.S1_AT	2.95e-20
	LES.3777.1.S1_AT	2.95e-20
	LES.4138.1.S1_AT	2.95e-20
	LES.5507.1.S1_AT	2.95e-20
	LES.267.1.S1_AT	2.95e-20
	LES.1909.1.S1_AT	2.95e-20
	LES.3703.1.S1_AT	2.95e-20
	LES.172.2.S1_A_AT	2.95e-20
	LES.4615.1.S1_AT	2.95e-20
	LES.4630.1.S1_AT	2.95e-20
	LES.252.1.S1_AT	2.95e-20
	LES.3052.3.A1_AT	2.95e-20
	LES.514.1.S1_AT	2.95e-20
	LES.5954.1.S1_AT	2.95e-20
	LES.3530.1.S1_AT	2.95e-20
	LES.5942.2.S1_AT	2.95e-20
	LES.5476.1.S1_AT	2.95e-20
	LES.3221.1.S1_AT	2.95e-20
	LES.4871.1.S1_AT	2.95e-20
	LES.3483.1.S1_AT	2.95e-20
	LES.5301.1.S1_AT	2.95e-20
	LES.5543.1.S1_AT	2.95e-20
	LES.5120.1.S1_AT	2.95e-20
	LES.3416.1.S1_AT	2.95e-20
	LES.209.1.S1_AT	2.95e-20
	LES.4678.1.S1_AT	2.95e-20
	LES.2745.1.S1_AT	2.95e-20
	LES.3935.1.S1_AT	2.95e-20
	LES.233.1.S1_AT	2.95e-20
	LES.2756.1.A1_AT	2.95e-20
	LES.2169.2.S1_AT	2.95e-20
	LES.3385.2.S1_A_AT	2.95e-20
	LES.3225.1.A1_AT	2.95e-20
	LES.5335.1.S1_AT	2.95e-20
	LES.4696.1.S1_AT	2.95e-20
	LES.3403.3.A1_AT	2.95e-20
	LES.4949.1.S1_AT	2.95e-20
	LES.5218.1.S1_AT	2.95e-20
	LES.3075.2.S1_AT	2.95e-20
	LES.4007.1.S1_AT	2.95e-20
	LES.1181.1.A1_AT	2.95e-20
	LES.3016.1.S1_AT	2.95e-20
	LES.5375.1.S1_AT	2.95e-20
	LES.4848.1.S1_AT	2.95e-20
	LES.479.1.S1_AT	2.95e-20
	LES.321.1.S1_AT	2.95e-20
	LES.4519.3.S1_AT	2.95e-20
	LES.2024.1.A1_AT	2.95e-20
	LES.3525.1.S1_AT	2.95e-20
	LES.5786.1.S1_AT	2.95e-20
	LES.3054.1.S1_AT	2.95e-20
	LES.4562.1.S1_AT	2.95e-20
	LES.2811.1.S1_AT	2.95e-20
	LES.2286.1.S1_AT	2.95e-20
	LES.3394.1.S1_AT	2.95e-20
	LES.3991.1.S1_AT	2.95e-20
	LES.86.1.S1_AT	2.95e-20
	LES.3545.1.S1_AT	2.95e-20
	LES.4360.1.S1_AT	2.95e-20
	LES.4740.1.S1_AT	2.95e-20
	LES.5027.1.S1_AT	2.95e-20
	LES.3014.1.S1_AT	2.95e-20
	LES.266.1.S1_A_AT	2.95e-20
	LES.4082.1.S1_AT	2.95e-20
	LES.3366.2.S1_A_AT	2.95e-20
	LES.3234.1.A1_AT	2.95e-20
	LES.5424.1.S1_AT	2.95e-20
	LES.3072.2.S1_AT	2.95e-20
	LES.4390.1.A1_AT	2.95e-20
	LES.194.1.S1_AT	2.95e-20
	LES.364.1.S1_AT	2.95e-20
	LES.2973.1.S1_AT	2.57e-05
	LES.4735.1.S1_AT	2.57e-05
	LES.477.1.S1_AT	2.57e-05
	LES.1724.1.S1_AT	2.57e-05
	LES.248.1.S1_A_AT	2.57e-05
	LES.2193.1.A1_AT	5.1e-05
	LES.4767.1.S1_AT	5.1e-05
	LES.4490.1.S1_AT	5.1e-05
	LES.422.1.S1_AT	7.54e-05
	LES.4428.1.S1_AT	7.54e-05
	LES.4757.1.S1_AT	7.54e-05
	LES.3574.1.S1_AT	7.54e-05
	LES.4573.1.S1_AT	7.54e-05
	LES.5731.1.S1_AT	7.54e-05
	LES.3623.1.S1_AT	0.000100251
	LES.392.1.S1_AT	0.000172414
	LES.5070.1.S1_AT	0.000172414
	LES.480.1.S1_AT	0.000172414
	LES.1.1.S1_AT	0.000172414
	LES.4760.1.S1_AT	0.000172414
	LES.2959.1.S1_AT	0.000172414
	LES.4344.1.S1_AT	0.000172414
	LES.2409.1.S1_AT	0.00019656
	LES.5617.1.S1_AT	0.000218978
	LES.3762.1.S1_AT	0.000218978
	LES.4599.1.S1_AT	0.000218978
	LES.3542.1.S1_AT	0.000218978
	LES.2298.2.A1_A_AT	0.000240964
	LES.3314.1.S1_AT	0.000240964
	LES.4502.1.S1_AT	0.000240964
	LES.4428.2.S1_AT	0.000240964
	LES.2297.1.S1_AT	0.00026253
	LES.4542.1.S1_AT	0.00026253
	LES.3624.1.S1_AT	0.00026253
	LES.5022.1.S1_AT	0.00026253
	LES.2768.1.S1_AT	0.000285036
	LES.3718.1.S1_AT	0.000285036
	LES.2974.1.A1_AT	0.000308057
	LES.2986.1.S1_AT	0.000330189
	LES.2860.1.S1_AT	0.000330189
	LES.3290.3.S1_AT	0.000352113
	LES.3815.1.S1_AT	0.000352113
	LES.231.1.S1_AT	0.000374707
	LES.5098.1.S1_AT	0.00039627
	LES.3156.1.S1_AT	0.00039627
	LES.5025.1.S1_AT	0.000417633
	LES.507.2.A1_AT	0.000417633
	LES.3390.1.S1_AT	0.000437788
	LES.4428.1.S1_A_AT	0.000437788
	LES.2897.1.S1_AT	0.000437788
	LES.5570.1.S1_AT	0.000482759
	LES.283.1.S1_AT	0.000549199
	LES.2350.2.S1_AT	0.000549199
	LES.4595.1.S1_AT	0.000565611
	LES.854.1.A1_AT	0.000565611
	LES.3049.1.A1_AT	0.000565611
	LES.477.2.S1_AT	0.000565611
	LES.2130.1.A1_AT	0.000565611
	LES.3755.1.A1_AT	0.000581655
	LES.5948.1.S1_AT	0.000581655
	LES.2514.1.S1_AT	0.000581655
	LES.3290.1.S1_AT	0.000581655
	LES.2822.2.S1_AT	0.000581655
	LES.5522.1.S1_AT	0.0006
	LES.5248.1.S1_AT	0.0006
	LES.2717.2.A1_AT	0.0006
	LES.2281.1.S1_AT	0.000619469
	LES.1793.1.A1_AT	0.000619469
	AFFX-LES-GAPDH-M_AT	0.000662252
	LES.4858.1.S1_AT	0.000681319
	LES.2924.1.S1_AT	0.000681319
	LES.2480.1.A1_AT	0.000723684
	LES.3260.1.S1_AT	0.000743982
	LES.770.1.A1_AT	0.00075594
	LES.477.3.A1_AT	0.00075594
	LES.130.1.S1_AT	0.00075594
	LES.5689.1.S1_AT	0.00075594
	LES.45.1.S1_AT	0.00075594
	LES.5421.1.S1_AT	0.00075594
	LES.3021.1.S1_AT	0.000795699
	LES.5386.1.S1_AT	0.000795699
	LES.5760.1.S1_AT	0.000851064
	LES.1406.1.A1_AT	0.000851064
	LES.2557.1.S1_AT	0.000851064
	LES.5668.1.S1_AT	0.000851064
	LES.1047.1.S1_AT	0.000851064
	LES.958.1.A1_AT	0.000868644
	LES.4535.1.S1_AT	0.000868644
	LES.1310.1.S1_AT	0.000930233
	LES.2652.1.S1_AT	0.000947368
	LES.4519.1.A1_AT	0.000947368
	LES.1724.3.A1_AT	0.00100629
	LES.4060.1.S1_AT	0.00100629
	LES.3470.1.S1_AT	0.0010251
	LES.1286.1.S1_AT	0.00104384
	LES.4590.1.S1_AT	0.00108333
	LES.1221.2.S1_AT	0.00116424
	LES.5329.1.S1_AT	0.00118257
	LES.1250.3.A1_AT	0.00123967
	LES.2813.2.A1_AT	0.00123967
	LES.3967.1.S1_AT	0.0012963
	LES.2941.3.A1_AT	0.0012963
	LES.1235.1.A1_AT	0.00131148
	LES.4512.1.S1_AT	0.00131148
	LES.4855.1.S1_AT	0.00145194
	LES.2650.1.S1_AT	0.00146939
	LES.243.1.S1_AT	0.00171079
	LES.4316.1.S1_AT	0.00172414
	LES.5835.1.S1_AT	0.00172414
	LES.3080.3.S1_AT	0.00179798
	LES.4650.1.S1_AT	0.00179798
	LES.159.1.S1_AT	0.00193548
	LES.611.2.A1_AT	0.00194779
	LES.2822.3.S1_AT	0.00194779
	LES.5017.1.A1_AT	0.00196393
	LES.4660.1.S1_AT	0.00198
	LES.4675.1.S1_AT	0.00199203
	LES.2253.1.S1_AT	0.00199203
	LES.5743.1.S1_AT	0.00202783
	LES.3463.1.S1_AT	0.0020396
	LES.4617.1.S1_AT	0.0020396
	LES.5400.1.S1_AT	0.00209393
	LES.4446.1.S1_AT	0.00209393
	LES.3540.1.S1_AT	0.00209393
	LES.656.2.S1_AT	0.00209393
	LES.2862.1.A1_AT	0.00209393
	LES.4614.1.S1_AT	0.00209393
	LES.3136.1.S1_AT	0.00214844
	LES.4648.1.S1_AT	0.00218324
	LES.2855.1.S1_AT	0.00219844
	LES.1203.1.A1_AT	0.0023062
	LES.5.1.S1_A_AT	0.0023062
	LES.626.1.S1_AT	0.00232108
	AFFX-LES-GAPDH-5_AT	0.00235521
	LES.5539.1.S1_AT	0.00242775
	LES.3185.3.S1_AT	0.00248077
	LES.1858.1.S1_AT	0.00249042
	LES.5157.1.S1_AT	0.00249042
	LES.2667.1.S1_AT	0.0025
	LES.3109.1.S1_AT	0.0025
	LES.1450.1.S1_AT	0.00254753
	LES.1221.3.S1_S_AT	0.00254753
	LES.5838.1.S1_AT	0.00270833
	LES.5830.1.S1_AT	0.00270833
	LES.3334.1.S1_AT	0.00277883
	LES.3311.3.S1_AT	0.00279245
	LES.3306.1.S1_AT	0.00280603
	LES.2991.1.A1_AT	0.0029291
	LES.4713.1.S1_AT	0.0029291
	LES.3391.1.S1_AT	0.0029291
	LES.1081.1.S1_AT	0.0029291
	LES.656.1.A1_AT	0.0029291
	LES.886.1.A1_AT	0.0029368
	LES.1250.2.S1_AT	0.0029368
	LES.5465.1.S1_AT	0.00294991
	LES.5690.1.S1_AT	0.00298148
	LES.3195.1.S1_AT	0.00299446
	LES.29.1.S1_AT	0.00302026
	LES.658.2.A1_AT	0.00302026
	LES.2608.1.S1_AT	0.00306985
	LES.4872.1.S1_AT	0.00315596
	LES.2905.1.S1_AT	0.00324176
	LES.2858.1.S1_AT	0.00334552
	LES.2592.1.S1_AT	0.00336976
	LES.5839.1.S1_AT	0.00336976
	LES.1722.1.S1_AT	0.00341198
	LES.2638.1.A1_AT	0.00341198
	LES.1128.2.S1_AT	0.00349005
	LES.3333.1.S1_AT	0.00349005
	LES.1762.1.S1_AT	0.00349549
	LES.2135.1.A1_AT	0.00349549
	LES.79.1.S1_A_AT	0.0035368
	LES.1091.1.A1_AT	0.0035368
	LES.2947.1.S1_AT	0.00360215
	LES.3185.1.A1_AT	0.003625
	LES.1492.2.A1_AT	0.003625
	LES.2920.2.S1_AT	0.00367201
	LES.4610.1.S1_AT	0.00371886
	LES.5015.1.S1_AT	0.00373002
	LES.4704.1.S1_AT	0.00375887
	LES.397.1.S1_AT	0.0039115
	LES.5260.1.S1_AT	0.0039576
	LES.2253.2.A1_AT	0.00398589
	LES.2177.1.A1_AT	0.00401408
	LES.5496.1.S1_AT	0.00414763
	LES.1032.3.S1_AT	0.00421053
	LES.4857.2.S1_AT	0.00443082
	LES.5008.1.S1_AT	0.00445804
	LES.5471.1.S1_AT	0.00448517
	LES.3099.1.S1_AT	0.0045122
	LES.2607.1.S1_AT	0.00452174
	LES.4377.2.S1_AT	0.00454861
	LES.3562.1.S1_AT	0.00457539
	LES.262.1.S1_AT	0.00459413
	LES.165.2.S1_AT	0.00459413
	LES.2768.2.A1_AT	0.0047931
	LES.2600.1.S1_AT	0.00492255
	LES.452.1.S1_AT	0.00494845
	LES.3337.2.S1_AT	0.00500858
	LES.226.1.S1_AT	0.00532423
	LES.2246.1.A1_AT	0.00532423
	LES.3326.1.S1_AT	0.00532423
	LES.5174.1.S1_AT	0.00540034
	LES.867.1.S1_AT	0.00542517
	LES.957.1.A1_AT	0.00553481
	LES.3457.1.S1_AT	0.00559322
	LES.1267.1.A1_AT	0.00573604
	LES.4931.1.S1_AT	0.00579392
	LES.1436.1.A1_AT	0.00591906
	LES.4789.1.S1_AT	0.00597643
	LES.3112.1.S1_AT	0.006
	LES.5650.1.S1_AT	0.00600671
	LES.1064.1.S1_AT	0.00608696
	LES.2001.1.S1_AT	0.00608696
	LES.3157.1.S1_AT	0.00612688
	LES.2777.1.S1_AT	0.00635
	LES.4671.1.S1_AT	0.00642263
	LES.4049.1.S1_AT	0.00651163
	LES.1924.1.S1_AT	0.00666667
	LES.1675.1.S1_AT	0.00675497
	LES.2546.3.S1_AT	0.00677686
	LES.2480.2.S1_AT	0.00694719
	LES.5804.1.S1_AT	0.00701149
	LES.3170.2.S1_AT	0.00701149
	LES.4376.1.S1_AT	0.00701149
	LES.175.1.S1_AT	0.00703279
	LES.3189.1.S1_AT	0.00715221
	LES.437.1.S1_AT	0.00718954
	LES.3236.1.S1_AT	0.00724307
	LES.4979.1.S1_AT	0.00726384
	LES.184.1.S1_AT	0.00754471
	LES.3139.1.S1_AT	0.00761364
	LES.461.1.S1_AT	0.00766613
	LES.3170.2.S1_A_AT	0.00776699
	LES.5208.1.S1_AT	0.00791599
	LES.222.2.A1_AT	0.008
	LES.2001.1.S1_S_AT	0.00809984
	LES.3311.2.S1_AT	0.0083119
	LES.5407.1.S1_AT	0.00886035
	LES.4647.1.S1_AT	0.00886218
	LES.3417.1.S1_AT	0.008896
	LES.425.1.S1_AT	0.00897764
	LES.4954.1.S1_AT	0.00897927
	LES.4539.2.S1_AT	0.00907643
	LES.2546.1.S1_AT	0.0091256
	LES.3038.1.S1_AT	0.00925397
	LES.4759.1.S1_AT	0.00933439
	LES.3433.1.S1_AT	0.00955696
	LES.4672.1.S1_AT	0.00955766
	LES.212.1.S1_AT	0.00960568
	LES.3167.1.S1_AT	0.00967033
	LES.4747.1.S1_AT	0.00967033
	LES.2329.1.A1_AT	0.00967033
	AFFX-LES-GAPDH-3_AT	0.00992163
	LES.699.1.S1_AT	0.0100936
	LES.3185.2.S1_AT	0.0100936
	LES.3345.1.S1_AT	0.0100936
	LES.428.1.S1_AT	0.0104799
	LES.4555.1.S1_AT	0.0104799
	LES.4539.1.S1_A_AT	0.0104799
	LES.4313.1.S1_AT	0.0104799
	LES.5854.1.S1_AT	0.0104799
	LES.4847.1.S1_AT	0.0106028
	LES.3362.1.S1_AT	0.0109414
	LES.3078.1.S1_AT	0.0110769
	LES.2980.1.S1_AT	0.0110769
	LES.548.1.S1_AT	0.0111792
	LES.3130.1.S1_AT	0.0111792
	LES.4539.1.S1_AT	0.0111792
	LES.2280.1.S1_AT	0.0113761
	LES.1930.1.A1_AT	0.0115267
	LES.4619.1.S1_AT	0.0115549
	LES.5628.1.S1_AT	0.0118569
	LES.3080.1.S1_AT	0.012003
	LES.2850.1.S1_AT	0.012003
	LES.2581.1.S1_AT	0.0120152
	LES.3595.1.S1_AT	0.0121483
	LES.3176.1.A1_AT	0.0123112
	LES.5596.1.S1_AT	0.0123831
	LES.4505.3.S1_AT	0.0126355
	LES.4739.1.S1_AT	0.0126617
	LES.4798.1.S1_AT	0.0127928
	LES.2217.1.A1_AT	0.0128443
	LES.3224.2.S1_AT	0.0128443
	LES.969.1.A1_AT	0.0130402
	LES.165.1.S1_AT	0.0130402
	LES.4010.1.S1_AT	0.0130402
	LES.734.1.S1_AT	0.0134673
	LES.3976.1.S1_AT	0.013685
	LES.5592.1.S1_AT	0.0137389
	LES.2920.2.S1_A_AT	0.013837
	LES.3296.2.S1_AT	0.0139201
	LES.1298.1.S1_AT	0.014003
	LES.5551.1.S1_AT	0.0143215
	LES.3380.1.S1_AT	0.0145214
	LES.1831.1.S1_AT	0.0145735
	LES.3337.1.A1_AT	0.0146109
	LES.2681.1.A1_AT	0.0146852
	LES.464.1.A1_AT	0.0146852
	LES.538.1.S1_AT	0.0151023
	LES.5466.1.S1_AT	0.0155182
	LES.5384.1.S1_AT	0.0155248
	LES.2576.1.A1_AT	0.0155604
	LES.1031.1.S1_AT	0.0155669
	LES.4294.1.S1_AT	0.0160232
	LES.1691.1.S1_AT	0.0164348
	LES.5408.1.S1_AT	0.0169754
	LES.630.1.S1_AT	0.0172832
	LES.931.1.A1_AT	0.0173593
	LES.3272.1.S1_AT	0.0174069
	LES.2777.2.A1_AT	0.0174069
	LES.4928.1.S1_AT	0.0174069
	LES.3253.1.S1_AT	0.0174069
	LES.2683.1.A1_AT	0.0174069
	LES.2324.1.S1_AT	0.0176967
	LES.2912.1.S1_AT	0.0177714
	LES.4717.1.S1_A_AT	0.0178459
	LES.4342.1.S1_AT	0.017906
	LES.5217.1.S1_AT	0.018037
	LES.1472.1.S1_AT	0.0180682
	LES.3471.1.S1_AT	0.0180709
	LES.5619.1.S1_AT	0.0181303
	LES.5272.1.S1_AT	0.0181754
	LES.4716.1.S1_AT	0.0185734
	LES.4261.1.S1_AT	0.0185755
	LES.3401.2.S1_AT	0.0187324
	LES.2822.1.A1_AT	0.0189311
	LES.4792.1.S1_AT	0.0198736
	LES.4484.1.S1_AT	0.0199158
	LES.4318.1.S1_AT	0.019916
	LES.5040.1.S1_AT	0.0202098
	LES.391.1.S1_S_AT	0.0202793
	LES.907.1.A1_AT	0.0203487
	LES.5870.1.S1_AT	0.0203621
	LES.4801.1.S1_AT	0.0204729
	LES.5595.1.S1_AT	0.0205972
	LES.1508.1.A1_AT	0.0209154
	LES.1125.1.S1_AT	0.0209972
	LES.4510.2.S1_AT	0.0212586
	LES.418.1.S1_AT	0.0213812
	LES.2920.3.S1_AT	0.0215172
	LES.3251.1.A1_AT	0.0221596
	LES.4684.1.S1_AT	0.0221596
	LES.2151.1.A1_AT	0.0225137
	LES.2074.1.A1_AT	0.0227298
	LES.3557.1.S1_AT	0.022863
	LES.1146.1.S1_AT	0.0229685
	LES.2704.1.S1_AT	0.023079
	LES.3337.3.S1_AT	0.023079
	LES.3437.2.A1_AT	0.023079
	LES.2947.2.A1_AT	0.0235646
	LES.3340.1.S1_AT	0.0236957
	LES.4381.1.S1_AT	0.0237398
	LES.2880.2.S1_AT	0.0237398
	LES.3150.1.S1_AT	0.0242219
	LES.2519.1.S1_AT	0.0243919
	LES.5942.1.S1_A_AT	0.0248448
	LES.5806.1.S1_AT	0.0248652
	LES.2074.2.S1_AT	0.0253701
	LES.1532.3.S1_S_AT	0.0254973
	LES.771.1.S1_AT	0.0257909
	LES.161.1.S1_AT	0.0257909
	LES.4036.1.S1_AT	0.0261981
	LES.4688.1.S1_AT	0.0263102
	LES.4875.1.S1_AT	0.0263551
	LES.3102.1.S1_AT	0.0264847
	LES.4510.1.S1_AT	0.0264847
	LES.5746.1.S1_AT	0.0266622
	LES.4365.1.S1_AT	0.0267463
	LES.3038.2.A1_AT	0.026817
	LES.307.1.S1_AT	0.0270464
	LES.2223.1.S1_AT	0.0270899
	LES.5942.1.S1_AT	0.0271334
	LES.5007.1.S1_AT	0.0273087
	LES.3615.1.S1_AT	0.0275362
	LES.4893.1.S1_AT	0.0275395
	LES.861.1.A1_AT	0.0277398
	LES.5646.1.S1_AT	0.0278215
	LES.738.1.S1_AT	0.0282438
	LES.311.1.S1_AT	0.0283812
	LES.2581.2.A1_AT	0.0283812
	LES.2884.1.S1_AT	0.0283812
	LES.2895.1.S1_AT	0.029296
	LES.4012.1.S1_AT	0.0294141
	LES.5703.1.S1_AT	0.0295189
	LES.1158.2.A1_AT	0.0295325
	LES.4345.2.A1_X_AT	0.0295331
	LES.4029.1.S1_AT	0.0297671
	LES.374.1.S1_AT	0.0297671
	LES.4301.1.S1_AT	0.0299483
	LES.1532.1.S1_AT	0.0303226
	LES.1500.1.A1_AT	0.0306701
	LES.4799.1.S1_AT	0.0312999
	LES.1561.1.S1_AT	0.0313496
	LES.4670.1.S1_AT	0.0320026
	LES.4553.1.S1_AT	0.0325128
	LES.5687.1.S1_AT	0.0331242
	LES.4505.1.S1_AT	0.0337468
	LES.1715.1.A1_AT	0.0341709
	LES.5011.1.S1_AT	0.0341709
	LES.3927.2.S1_AT	0.0342567
	LES.3170.1.A1_AT	0.0342567
	LES.4602.1.S1_AT	0.0342567
	LES.3368.1.S1_AT	0.0343528
	LES.5066.1.S1_AT	0.0345627
	LES.421.1.S1_AT	0.0354684
	LES.698.1.S1_AT	0.0365234
	LES.1221.1.A1_AT	0.0366288
	LES.2598.1.S1_AT	0.0369609
	LES.4345.4.A1_X_AT	0.0372292
	LES.2978.1.A1_AT	0.0372453
	LES.5492.1.S1_AT	0.0372739
	LES.5212.1.S1_AT	0.0374404
	LES.4017.1.S1_AT	0.0375815
	LES.1408.2.A1_AT	0.0390375
	LES.3553.1.S1_AT	0.0390375
	LES.3711.1.S1_AT	0.0392509
	LES.5127.1.S1_AT	0.0394638
	LES.4646.1.S1_AT	0.039602
	LES.3393.1.S1_AT	0.039602
	LES.409.2.S1_AT	0.0402978
	LES.3208.1.S1_AT	0.0402978
	LES.5756.1.S1_AT	0.0413738
	LES.4295.1.S1_AT	0.0413738
	LES.2957.1.A1_AT	0.0414074
	LES.1041.1.A1_AT	0.0414074
	LES.2954.2.A1_AT	0.0414303
	LES.187.1.S1_AT	0.0414409
	LES.1032.1.A1_AT	0.0419557
	LES.2618.1.S1_AT	0.0427485
	LES.4633.1.S1_AT	0.0427485
	LES.4345.2.A1_A_AT	0.043076
	LES.3182.1.S1_AT	0.0432396
	LES.5405.1.S1_AT	0.0432396
	LES.3043.1.S1_AT	0.0433944
	LES.4554.1.S1_AT	0.0434063
	LES.3311.1.S1_AT	0.0434063
	LES.5635.1.S1_A_AT	0.0434063
	LES.1727.1.A1_AT	0.0436452
	LES.489.1.S1_AT	0.0441141
	LES.3115.1.S1_AT	0.0445212
	LES.5383.1.S1_AT	0.0457074
	LES.2919.1.S1_AT	0.0457074
	LES.2724.1.S1_AT	0.0457419
	LES.3165.1.S1_AT	0.0457419
	LES.5625.1.S1_AT	0.0468434
	LES.2898.1.S1_AT	0.0474729
	LES.4083.1.S1_AT	0.0476803
	LES.4014.1.S1_AT	0.0480072
	LES.608.1.S1_AT	0.0486811
	LES.2491.2.S1_AT	0.0498323

## Sheet: S 2
Table S2 - Abiotic samples combined meta-analysis (by maxP)
ID	maxP
LES.3267.3.A1_AT	2.95e-20
LES.1606.1.S1_AT	2.95e-20
LES.3969.1.S1_AT	2.95e-20
LES.1399.1.A1_AT	2.95e-20
LES.4519.2.S1_AT	2.95e-20
LES.292.1.S1_AT	2.95e-20
LES.4769.1.S1_AT	2.95e-20
LES.4610.1.S1_AT	0.00371886
LES.4834.1.S1_AT	2.95e-20
LES.4794.1.S1_AT	2.95e-20
LES.1781.1.S1_A_AT	2.95e-20
LES.3449.1.S1_AT	2.95e-20
LES.3733.1.S1_AT	2.95e-20
AFFX-LES-GAPDH-M_AT	0.000662252

## Sheet: S 3
Table S 3 - Biotic samples combined meta-analysis (by Fisher)
ID	Fisher
LES.1255.1.S1_AT	7.04e-19
LES.1360.1.S1_AT	7.04e-19
LES.1501.1.A1_AT	7.04e-19
LES.157.1.S1_AT	7.04e-19
LES.1606.1.S1_AT	7.04e-19
LES.1951.1.A1_AT	7.04e-19
LES.217.1.S1_AT	7.04e-19
LES.2183.3.S1_AT	7.04e-19
LES.2529.1.A1_AT	7.04e-19
LES.254.1.S1_AT	7.04e-19
LES.2668.2.A1_AT	7.04e-19
LES.2940.2.S1_AT	7.04e-19
LES.2989.1.S1_AT	7.04e-19
LES.3009.2.S1_AT	7.04e-19
LES.3090.1.S1_AT	7.04e-19
LES.3168.1.S1_AT	7.04e-19
LES.3209.1.S1_AT	7.04e-19
LES.3358.1.S1_AT	7.04e-19
LES.3460.1.S1_AT	7.04e-19
LES.3493.1.S1_AT	7.04e-19
LES.3510.1.S1_AT	7.04e-19
LES.3583.1.A1_AT	7.04e-19
LES.3652.1.S1_AT	7.04e-19
LES.3725.1.S1_AT	7.04e-19
LES.3774.1.S1_AT	7.04e-19
LES.3779.1.S1_AT	7.04e-19
LES.3828.1.S1_AT	7.04e-19
LES.3972.1.S1_AT	7.04e-19
LES.3991.1.S1_AT	7.04e-19
LES.4021.1.A1_AT	7.04e-19
LES.4026.1.S1_AT	7.04e-19
LES.441.1.S1_S_AT	7.04e-19
LES.4439.1.S1_AT	7.04e-19
LES.4442.1.S1_S_AT	7.04e-19
LES.4460.1.S1_AT	7.04e-19
LES.4603.1.S1_AT	7.04e-19
LES.4727.1.S1_AT	7.04e-19
LES.4779.1.S1_AT	7.04e-19
LES.4924.1.S1_AT	7.04e-19
LES.4933.1.S1_AT	7.04e-19
LES.4946.1.S1_AT	7.04e-19
LES.5051.1.S1_AT	7.04e-19
LES.5064.1.S1_AT	7.04e-19
LES.5077.1.S1_AT	7.04e-19
LES.5138.1.S1_AT	7.04e-19
LES.5139.1.S1_AT	7.04e-19
LES.5158.1.S1_AT	7.04e-19
LES.5231.1.S1_AT	7.04e-19
LES.5433.1.S1_AT	7.04e-19
LES.5579.1.S1_AT	7.04e-19
LES.56.1.S1_AT	7.04e-19
LES.5934.1.S1_AT	7.04e-19
LES.677.1.S1_AT	7.04e-19
LES.68.2.S1_A_AT	7.04e-19
LESAFFX.124.1.S1_AT	7.04e-19
LESAFFX.17017.1.S1_AT	7.04e-19
LESAFFX.22491.2.A1_AT	7.04e-19
LESAFFX.29757.2.S1_AT	7.04e-19
LESAFFX.3635.2.A1_AT	7.04e-19
LESAFFX.37337.1.S1_AT	7.04e-19
LESAFFX.41330.2.S1_AT	7.04e-19
LESAFFX.51300.1.S1_AT	7.04e-19
LESAFFX.52595.1.S1_AT	7.04e-19
LESAFFX.57572.1.S1_AT	7.04e-19
LESAFFX.5912.1.A1_AT	7.04e-19
LESAFFX.66744.1.S1_AT	7.04e-19
LESAFFX.69659.1.S1_AT	7.04e-19
LESAFFX.70712.1.S1_AT	7.04e-19
LESAFFX.8850.1.S1_AT	7.04e-19
LESAFFX.9038.3.S1_AT	7.04e-19
LESAFFX.9367.1.S1_AT	7.04e-19
LES.129.1.S1_AT	0.000116279
LES.1719.1.A1_AT	0.000116279
LES.2747.1.S1_AT	0.000116279
LES.2747.2.S1_AT	0.000116279
LES.275.1.S1_AT	0.000116279
LES.293.1.S1_AT	0.000116279
LES.3358.1.S1_A_AT	0.000116279
LES.3575.1.S1_AT	0.000116279
LES.4707.1.S1_AT	0.000116279
LES.4999.1.S1_AT	0.000116279
LES.5759.1.S1_AT	0.000116279
LES.812.3.A1_AT	0.000116279
LESAFFX.18587.1.S1_AT	0.000116279
LESAFFX.25313.1.S1_AT	0.000116279
LESAFFX.49809.1.S1_AT	0.000116279
LES.1020.2.A1_AT	0.00020202
LES.3039.1.S1_AT	0.00020202
LES.3311.3.S1_AT	0.00020202
LES.3358.2.S1_AT	0.00020202
LES.3487.1.S1_AT	0.00020202
LES.4482.1.S1_AT	0.00020202
LES.4501.1.S1_AT	0.00020202
LES.797.1.S1_AT	0.00020202
LESAFFX.16769.1.S1_AT	0.00020202
LESAFFX.23253.1.S1_AT	0.00020202
LESAFFX.52290.1.S1_AT	0.00020202
LESAFFX.5533.1.S1_AT	0.00020202
LESAFFX.5860.1.S1_AT	0.00020202
LES.123.1.S1_AT	0.000283019
LES.1997.1.S1_AT	0.000283019
LES.3502.1.S1_AT	0.000283019
LES.435.1.S1_AT	0.000283019
LESAFFX.344.3.S1_AT	0.000283019
LESAFFX.47004.1.S1_AT	0.000283019
LESAFFX.735.1.S1_AT	0.000283019
LES.4959.1.S1_AT	0.00037037
LESAFFX.62349.1.S1_AT	0.00037037
LES.177.1.S1_AT	0.000434783
LES.2544.1.A1_AT	0.000434783
LES.3322.3.S1_AT	0.000434783
LES.5517.1.S1_AT	0.000434783
LESAFFX.286.2.S1_A_AT	0.000434783
LESAFFX.42534.1.S1_AT	0.000434783
LESAFFX.71442.2.S1_AT	0.000434783
LES.2055.1.S1_AT	0.0005
LES.3311.2.S1_AT	0.0005
LES.5755.1.S1_AT	0.0005
LES.5930.1.S1_AT	0.0005
LESAFFX.51271.1.S1_AT	0.0005
LES.33.1.S1_AT	0.00056
LES.3311.1.S1_AT	0.00056
LES.3506.1.S1_AT	0.00056
LES.4923.1.S1_AT	0.00056
LESAFFX.3081.1.S1_AT	0.00056
LES.3608.1.S1_AT	0.000634921
LES.1360.2.A1_AT	0.000708661
AFFX-LES-GAPDH-5_AT	0.000769231
LES.5208.1.S1_AT	0.000769231
LESAFFX.23253.2.S1_AT	0.000769231
LES.1037.1.A1_AT	0.000791367
LES.122.1.S1_AT	0.000791367
LES.2278.1.S1_AT	0.000791367
LES.2899.1.S1_AT	0.000791367
LES.3666.1.S1_AT	0.000791367
LES.857.1.S1_AT	0.000791367
LESAFFX.44563.1.A1_AT	0.000791367
LESAFFX.62570.2.S1_AT	0.000791367
LESAFFX.66096.2.S1_AT	0.000791367
LES.119.1.S1_AT	0.000828025
LES.1431.1.A1_AT	0.000828025
LES.1617.3.A1_S_AT	0.000828025
LES.270.1.S1_AT	0.000828025
LES.3092.1.S1_AT	0.000828025
LES.3193.1.S1_AT	0.000828025
LES.327.1.S1_AT	0.000828025
LES.3408.1.S1_AT	0.000828025
LES.4405.1.A1_AT	0.000828025
LES.4993.1.S1_AT	0.000828025
LES.5014.1.S1_AT	0.000828025
LES.677.2.A1_AT	0.000828025
LESAFFX.45975.1.S1_AT	0.000828025
LESAFFX.66335.1.S1_AT	0.000828025
LESAFFX.71532.1.S1_AT	0.000828025
LESAFFX.71606.1.S1_S_AT	0.000828025
LESAFFX.7602.1.S1_AT	0.000828025
LESAFFX.9824.1.S1_AT	0.000828025
LES.3322.2.S1_AT	0.000886076
LES.231.1.S1_AT	0.0009375
LESAFFX.67298.1.S1_AT	0.0009375
LES.322.1.S1_AT	0.00117284
LESAFFX.67147.1.S1_AT	0.00117284
LES.1287.1.A1_AT	0.00119048
LES.1724.3.A1_AT	0.00119048
LES.1859.2.S1_AT	0.00119048
LES.5076.1.S1_AT	0.00119048
LES.5626.1.S1_AT	0.00119048
LESAFFX.12254.1.S1_AT	0.00119048
LES.2137.1.S1_AT	0.0012069
LES.220.1.S1_AT	0.0012069
LES.5090.1.S1_AT	0.0012069
LESAFFX.1475.1.S1_AT	0.0012069
LESAFFX.3438.1.A1_AT	0.0012069
LESAFFX.63935.1.S1_AT	0.0012069
AFFX-LES-GAPDH-M_AT	0.00121547
LES.2512.2.S1_AT	0.00121547
LES.5025.1.S1_AT	0.00121547
LES.5567.1.S1_AT	0.00121547
LESAFFX.10955.1.S1_AT	0.00121547
LESAFFX.43341.1.S1_AT	0.00121547
LESAFFX.71228.1.S1_AT	0.00121547
LES.1.1.S1_AT	0.00123656
LES.259.2.S1_A_AT	0.00123656
LESAFFX.55211.1.S1_S_AT	0.00123656
LESAFFX.71654.1.S1_AT	0.00123656
LESAFFX.805.1.S1_AT	0.00123656
LES.178.1.S1_AT	0.00128866
LES.3632.1.S1_AT	0.00128866
LES.4025.1.S1_AT	0.00128866
LES.4268.1.S1_AT	0.00128866
LES.4627.1.S1_AT	0.00128866
LES.5229.1.S1_AT	0.00128866
LES.5341.1.S1_AT	0.00128866
LESAFFX.4785.1.S1_AT	0.00128866
LES.1097.1.A1_AT	0.0013
LES.3625.1.S1_AT	0.0013
LES.3742.1.S1_AT	0.0013
LES.5126.1.S1_AT	0.0013
LESAFFX.19956.1.S1_AT	0.0013
LESAFFX.25974.1.S1_AT	0.0013
LESAFFX.1861.4.S1_AT	0.00133663
LESAFFX.25827.1.S1_AT	0.00133663
LES.3101.1.S1_AT	0.00135266
LES.4007.1.S1_AT	0.00135266
LES.5344.1.S1_AT	0.00135266
LES.842.2.S1_A_AT	0.00135266
LESAFFX.68459.2.S1_AT	0.00135266
LES.1046.1.S1_AT	0.0014554
LES.1724.1.S1_AT	0.0014554
LES.3500.1.S1_AT	0.0014554
LES.3687.1.S1_AT	0.0014554
LES.4740.1.S1_AT	0.0014554
LESAFFX.10313.1.A1_AT	0.0014554
LES.1020.1.A1_A_AT	0.00146789
LES.2479.2.S1_AT	0.00146789
LES.2490.1.S1_AT	0.00146789
LES.3160.1.S1_AT	0.00146789
LES.5521.1.S1_AT	0.00146789
LES.1826.1.A1_AT	0.00153846
LES.2026.1.S1_AT	0.00153846
LES.208.1.S1_AT	0.00153846
LES.2325.1.S1_AT	0.00153846
LES.2765.2.S1_AT	0.00153846
LES.3205.1.S1_AT	0.00153846
LES.3526.1.S1_A_AT	0.00153846
LES.4490.1.S1_AT	0.00153846
LES.4655.1.S1_AT	0.00153846
LES.502.1.S1_AT	0.00153846
LES.5523.1.S1_AT	0.00153846
LES.842.2.S1_AT	0.00153846
LESAFFX.3099.1.S1_AT	0.00153846
LESAFFX.46243.1.S1_AT	0.00153846
LESAFFX.62264.2.S1_AT	0.00153846
LESAFFX.71304.1.S1_AT	0.00153846
LESAFFX.30810.1.S1_AT	0.00157447
LES.1478.1.S1_AT	0.00161017
LES.1972.1.S1_AT	0.00165975
LES.2717.1.S1_AT	0.00165975
LES.2810.1.A1_AT	0.00165975
LESAFFX.2597.1.S1_AT	0.00165975
LESAFFX.4763.1.S1_AT	0.00165975
LES.1501.2.S1_AT	0.00166667
LES.2351.1.S1_AT	0.00166667
LES.3334.2.S1_AT	0.00166667
LES.3557.1.S1_AT	0.00166667
LES.369.1.S1_AT	0.00166667
LES.4412.1.A1_AT	0.00166667
LES.4437.2.S1_AT	0.00166667
LES.5671.1.S1_AT	0.00166667
LES.72.1.S1_AT	0.00166667
LESAFFX.50448.2.S1_AT	0.00166667
LESAFFX.62670.1.S1_AT	0.00166667
LES.2688.1.S1_AT	0.00169961
LESAFFX.71608.1.S1_AT	0.00181102
LES.1732.1.S1_AT	0.001875
LES.3614.1.S1_AT	0.001875
LES.2027.2.S1_S_AT	0.00189189
LES.3418.1.S1_AT	0.00189189
LESAFFX.16164.1.S1_AT	0.00189189
LES.2565.2.S1_AT	0.00190114
LES.317.1.S1_AT	0.00190114
LES.4223.1.S1_AT	0.00190114
LES.5696.1.S1_AT	0.00190114
LES.2702.1.S1_A_AT	0.00193309
LES.2858.1.S1_AT	0.00193309
LES.5318.1.S1_AT	0.00193309
LESAFFX.1959.1.S1_AT	0.00193309
LESAFFX.47187.1.S1_AT	0.00193309
LESAFFX.64518.1.S1_AT	0.00193309
LES.3225.3.S1_AT	0.00196296
LESAFFX.12254.2.S1_AT	0.00202952
LES.3225.1.A1_AT	0.0020438
LES.4519.3.S1_AT	0.0020438
LESAFFX.71016.1.S1_AT	0.0020438
LES.5833.1.S1_AT	0.00210909
LESAFFX.64585.1.S1_AT	0.00213768
LES.113.1.S1_AT	0.00219081
LES.1205.1.A1_AT	0.00219081
LES.2182.3.S1_AT	0.00219081
LES.4756.1.S1_AT	0.00219081
LES.507.2.A1_AT	0.00219081
LESAFFX.30807.1.S1_AT	0.00219081
LESAFFX.64403.2.S1_AT	0.00219081
LESAFFX.4854.2.S1_AT	0.00221831
LES.4768.1.S1_AT	0.00224561
LES.2027.2.S1_AT	0.00225694
LES.4573.1.S1_AT	0.00225694
LESAFFX.70067.1.S1_AT	0.00225694
LES.4783.1.S1_AT	0.00228374
LES.110.1.S1_AT	0.00228669
LES.941.1.A1_AT	0.00228669
LESAFFX.68493.1.S1_AT	0.00228669
LESAFFX.71598.1.S1_AT	0.00228669
LES.3180.3.A1_AT	0.00230509
LES.3681.1.S1_AT	0.00230509
LES.1287.2.S1_AT	0.00232323
LES.644.1.S1_AT	0.00232323
LES.4834.1.S1_AT	0.00237458
LES.4979.1.S1_AT	0.00237458
LES.5815.1.S1_AT	0.00243333
LES.1931.1.A1_AT	0.00245033
LESAFFX.13824.1.S1_AT	0.00245033
LESAFFX.58351.1.S1_AT	0.00254125
LES.1664.1.S1_AT	0.00254902
LES.5656.1.S1_AT	0.00254902
LESAFFX.10955.2.S1_AT	0.00254902
LES.3555.1.S1_AT	0.00262987
LES.5514.1.S1_AT	0.00262987
LES.1297.1.S1_AT	0.00265625
LES.1793.1.A1_AT	0.00265625
LES.1847.1.A1_AT	0.00265625
LES.2415.3.A1_AT	0.00265625
LES.4276.1.S1_AT	0.00265625
LES.5029.1.S1_AT	0.00265625
LES.5038.1.S1_AT	0.00265625
LES.782.1.S1_AT	0.00265625
LESAFFX.295.2.S1_AT	0.00265625
LESAFFX.57363.1.S1_AT	0.00265625
LESAFFX.60825.1.S1_AT	0.00265625
LESAFFX.65273.1.S1_AT	0.00265625
LES.1288.1.S1_AT	0.00266055
LES.2717.2.A1_AT	0.00266055
LES.3657.1.S1_AT	0.00266055
LES.4735.1.S1_AT	0.00266055
LES.5156.1.S1_AT	0.00266055
LESAFFX.25451.1.S1_AT	0.00266055
LESAFFX.64990.1.S1_AT	0.00266055
LESAFFX.70627.1.S1_AT	0.00268293
LES.5281.1.S1_AT	0.00270517
LES.3017.2.S1_AT	0.00284848
LES.3225.2.S1_AT	0.00285285
LES.455.2.S1_AT	0.00285285
LES.5859.1.S1_AT	0.00285285
LES.4542.1.S1_AT	0.00286982
LES.5200.1.S1_AT	0.00286982
LES.5555.1.S1_AT	0.00286982
LESAFFX.59668.1.S1_AT	0.00286982
LESAFFX.6844.1.S1_AT	0.00286982
LES.3457.1.S1_AT	0.00300885
LES.2860.1.S1_AT	0.00304985
LESAFFX.15342.1.S1_AT	0.00304985
LES.3486.1.S1_AT	0.00307018
LES.241.1.A1_AT	0.00308139
LES.3007.2.S1_AT	0.00308139
LES.2026.2.A1_AT	0.00318052
LES.3151.1.S1_AT	0.00318052
LES.4652.1.S1_AT	0.00318052
LES.542.1.A1_AT	0.00318052
LESAFFX.20391.1.S1_AT	0.00318052
LES.1424.2.S1_AT	0.00322034
LES.2613.2.S1_AT	0.00322034
LES.3824.1.A1_AT	0.00322034
LES.4880.1.S1_AT	0.00322034
LESAFFX.17303.1.A1_AT	0.00322034
LES.1310.1.S1_AT	0.0032345
LES.1699.2.S1_AT	0.0032345
LES.3007.1.S1_AT	0.0032345
LES.335.1.S1_AT	0.0032345
LES.3525.1.S1_AT	0.0032345
LES.4462.1.S1_AT	0.0032345
LES.4695.1.S1_AT	0.0032345
LES.490.1.A1_AT	0.0032345
LES.5933.1.S1_AT	0.0032345
LES.5952.1.S1_AT	0.0032345
LESAFFX.10095.1.A1_AT	0.0032345
LESAFFX.2889.3.S1_AT	0.0032345
LESAFFX.3606.1.S1_AT	0.0032345
LESAFFX.37344.2.S1_AT	0.0032345
LESAFFX.46937.1.S1_AT	0.0032345
LESAFFX.56520.1.S1_AT	0.0032345
LESAFFX.71065.1.S1_AT	0.0032345
LES.4417.1.A1_AT	0.00324397
LESAFFX.16925.1.S1_AT	0.00324397
LES.2579.1.A1_AT	0.00325397
LES.2817.1.S1_AT	0.00325397
LES.85.1.S1_AT	0.00325397
LESAFFX.1233.1.S1_AT	0.00325397
LESAFFX.56634.1.S1_AT	0.00325397
LES.4921.1.S1_AT	0.00332454
LES.1485.1.S1_AT	0.00348052
LES.2247.2.S1_AT	0.00348052
LES.2285.1.A1_AT	0.00348052
LES.2306.1.A1_AT	0.00348052
LES.2770.1.S1_AT	0.00348052
LES.311.1.S1_AT	0.00348052
LES.1744.1.S1_AT	0.00354756
LES.2595.1.A1_AT	0.00354756
LES.5650.1.S1_AT	0.00354756
LESAFFX.69264.1.S1_AT	0.00354756
LESAFFX.5309.1.S1_AT	0.0035641
LES.5530.1.S1_AT	0.00358779
LES.5638.1.S1_AT	0.00358779
LESAFFX.66814.1.S1_AT	0.00358779
LES.3293.3.S1_AT	0.00364557
LESAFFX.66478.1.S1_AT	0.00364557
LES.5293.1.S1_AT	0.00365239
LESAFFX.10955.3.S1_AT	0.00365239
LES.3263.1.A1_A_AT	0.00366584
LES.4819.1.S1_AT	0.00366584
LES.5213.1.S1_AT	0.00366584
LESAFFX.98.1.S1_AT	0.00366584
LES.2014.1.A1_AT	0.00368159
LES.3418.2.S1_A_AT	0.00371007
LES.5481.1.S1_AT	0.00371007
LESAFFX.22812.2.S1_AT	0.00371007
LESAFFX.63367.1.S1_AT	0.00371007
LESAFFX.65152.1.S1_AT	0.00371007
LES.3171.3.S1_A_AT	0.00371638
LES.3773.1.S1_AT	0.00371638
LES.2657.1.S1_AT	0.00372263
LESAFFX.63659.1.S1_AT	0.00372263
LES.5841.1.S1_AT	0.00373786
LES.73.1.S1_AT	0.00380145
LES.4709.1.S1_AT	0.00381643
LESAFFX.46368.1.S1_AT	0.00383133
LES.5017.1.A1_AT	0.00389021
LESAFFX.187.1.S1_AT	0.00389021
LESAFFX.68455.1.S1_AT	0.00389021
LESAFFX.71311.1.S1_AT	0.00389021
LES.2140.1.A1_AT	0.00390476
LESAFFX.6125.1.S1_AT	0.00396675
LES.4664.1.S1_AT	0.00402844
LES.2479.1.S1_AT	0.00404206
LES.2526.1.S1_AT	0.00404206
LES.262.1.S1_AT	0.00404206
LES.3573.1.S1_AT	0.00404206
LESAFFX.22051.2.S1_AT	0.00404206
LESAFFX.47885.1.S1_AT	0.00404206
LES.5091.1.S1_AT	0.00407925
LESAFFX.50814.1.S1_AT	0.00409302
LES.3052.3.A1_AT	0.00410673
LESAFFX.65306.1.S1_AT	0.00414352
LESAFFX.36712.1.S1_AT	0.00415704
LES.2842.2.A1_AT	0.00421659
LES.3710.1.S1_AT	0.00422018
LESAFFX.68907.1.S1_AT	0.00422018
LES.3038.2.A1_AT	0.00425
LES.4271.2.S1_AT	0.00425
LES.5812.1.S1_AT	0.00425
LESAFFX.30842.1.S1_AT	0.00425
LES.812.1.S1_AT	0.00426304
LESAFFX.344.2.S1_AT	0.00427602
LES.132.1.S1_AT	0.00428894
LESAFFX.53904.1.S1_AT	0.00434685
LES.4496.1.S1_AT	0.00435955
LES.1781.1.S1_AT	0.0043722
LES.2677.1.S1_AT	0.00438479
LESAFFX.344.7.S1_AT	0.00439732
LESAFFX.22811.1.S1_AT	0.00444444
LESAFFX.64285.1.S1_AT	0.00444444
LES.2578.1.S1_AT	0.00448124
LESAFFX.36884.1.S1_AT	0.00448124
LESAFFX.62669.1.S1_AT	0.00448124
LES.3672.1.S1_AT	0.00451542
LES.3777.1.S1_AT	0.0045614
LESAFFX.67632.1.S1_AT	0.0045614
LES.3011.1.S1_AT	0.00459519
LES.3762.1.S1_AT	0.00465066
LES.20.1.S1_AT	0.0046841
LES.2886.1.A1_AT	0.00476087
LES.1179.1.A1_AT	0.00476496
LES.140.1.S1_AT	0.00476496
LES.4870.1.S1_AT	0.00476496
LES.5661.1.S1_AT	0.00476496
LES.5835.1.S1_AT	0.00476496
LESAFFX.32595.1.S1_AT	0.00476496
LESAFFX.69795.1.S1_AT	0.00476496
LESAFFX.70414.1.S1_AT	0.00476496
LES.2130.1.A1_AT	0.00478723
LES.628.2.S1_AT	0.00478723
LES.5631.1.S1_AT	0.0047983
LES.3481.1.S1_A_AT	0.00480932
LESAFFX.64171.1.S1_AT	0.00484144
LES.1064.1.S1_AT	0.00485232
LES.4060.1.S1_AT	0.0048954
LES.43.1.S1_AT	0.0048954
LES.4539.2.S1_AT	0.0048954
LESAFFX.59569.1.S1_AT	0.0048954
LES.4922.1.S1_AT	0.00489583
LESAFFX.70264.1.S1_AT	0.00489583
LESAFFX.10299.1.S1_AT	0.00493776
LESAFFX.98.2.S1_AT	0.00493776
LES.145.1.S1_AT	0.00493853
LES.199.2.S1_AT	0.00493853
LES.5102.1.S1_AT	0.00493853
LES.5322.1.S1_AT	0.00493853
LES.5699.1.S1_AT	0.00493853
LESAFFX.70522.1.S1_AT	0.00493853
LES.364.1.S1_AT	0.00501023
LES.722.1.A1_AT	0.00504082
LES.1250.2.S1_AT	0.00505051
LES.1830.1.A1_AT	0.00505051
LES.194.1.S1_AT	0.00505051
LES.5311.1.S1_AT	0.00505051
LES.5649.1.S1_AT	0.00505051
LES.4625.1.S1_AT	0.00508064
LES.2289.1.A1_AT	0.00521042
LES.4660.1.S1_AT	0.00521042
LES.5018.1.S1_AT	0.00521042
LES.127.1.S1_AT	0.00523904
LES.3214.1.S1_AT	0.00523904
LES.4941.1.S1_AT	0.00523904
LES.1493.1.S1_AT	0.00532416
LES.3566.1.S1_AT	0.00532416
LES.3815.1.S1_AT	0.00532416
LES.4140.1.S1_AT	0.00532416
LES.429.1.S1_AT	0.00532416
LES.5205.1.S1_AT	0.00532416
LESAFFX.69647.2.S1_AT	0.00532416
LES.2562.1.S1_AT	0.00533333
LES.2100.1.A1_AT	0.00534247
LES.3048.2.S1_A_AT	0.00538012
LES.3287.1.S1_AT	0.00538012
LES.4437.1.S1_AT	0.00541748
LESAFFX.64439.1.S1_AT	0.00541748
LES.3275.2.S1_AT	0.00545279
LESAFFX.15921.1.S1_AT	0.00545279
LESAFFX.3802.2.S1_AT	0.00545279
LESAFFX.64234.2.S1_AT	0.00545279
LES.2257.1.A1_AT	0.00548757
LES.5852.2.S1_AT	0.00548757
LESAFFX.17663.2.A1_AT	0.00548757
LESAFFX.4854.1.S1_AT	0.00548757
LES.4920.1.S1_AT	0.00551527
LES.4277.1.A1_AT	0.00554286
LES.3376.1.A1_AT	0.00562738
LES.3255.1.S1_AT	0.00565465
LESAFFX.71322.1.S1_AT	0.00570076
LES.1221.2.S1_AT	0.00572233
LES.276.1.S1_AT	0.00572233
LES.4018.1.S1_AT	0.00572233
LES.4379.1.S1_AT	0.00572233
LES.4701.1.S1_AT	0.00572233
LES.4263.1.S1_AT	0.00573034
LES.2914.1.S1_AT	0.00573557
LESAFFX.10348.1.S1_AT	0.00573557
LESAFFX.65209.1.S1_AT	0.00573557
LES.2351.2.A1_AT	0.0057885
LESAFFX.63687.1.S1_AT	0.0057885
LES.2187.1.A1_AT	0.00587037
LES.1929.3.S1_AT	0.00595941
LES.4254.1.S1_AT	0.00595941
LES.4710.1.S1_AT	0.00601835
LES.514.1.S1_AT	0.00601835
LES.771.1.S1_AT	0.00601835
LES.5742.1.S1_AT	0.00602564
LESAFFX.6388.1.S1_AT	0.00603291
AFFX-LES-GAPDH-3_AT	0.00609319
LES.147.1.S1_AT	0.00609319
LES.2044.1.A1_AT	0.00609319
LES.2123.1.A1_AT	0.00609319
LES.2873.2.S1_AT	0.00609319
LES.4483.1.S1_AT	0.00609319
LES.4855.1.S1_AT	0.00609319
LES.5044.1.S1_AT	0.00609319
LESAFFX.16353.1.S1_AT	0.00609319
LESAFFX.61214.1.S1_AT	0.00609319
LESAFFX.70325.2.S1_AT	0.00609319
LES.241.3.S1_AT	0.006125
LES.3726.1.S1_AT	0.006125
LES.3275.1.A1_AT	0.00616756
LES.5960.1.S1_AT	0.0062234
LESAFFX.69647.1.S1_AT	0.0062234
LESAFFX.70764.1.S1_AT	0.0062234
LES.3263.3.S1_AT	0.00623009
LES.1558.2.A1_AT	0.0062807
LES.1828.1.A1_AT	0.0062807
LES.3038.1.S1_AT	0.0062807
LESAFFX.63074.1.S1_AT	0.0062807
LESAFFX.837.1.S1_AT	0.0062807
LES.2247.1.A1_AT	0.00631763
LES.2637.1.S1_AT	0.00631763
LESAFFX.18117.1.S1_AT	0.00631763
LESAFFX.46136.1.S1_AT	0.00632404
LESAFFX.62975.1.S1_AT	0.0064
LES.4429.2.A1_AT	0.00642361
LES.5215.1.S1_AT	0.00642981
LES.1532.3.S1_S_AT	0.00643103
LES.2522.1.S1_AT	0.00643103
LESAFFX.16424.1.S1_S_AT	0.00643103
LES.546.1.A1_AT	0.00648881
LES.2765.3.S1_AT	0.00652921
LES.25.1.S1_AT	0.00656997
LES.2560.1.S1_AT	0.00656997
LES.2763.1.S1_AT	0.00656997
LES.601.1.S1_AT	0.00656997
LES.1841.1.S1_AT	0.00660988
LES.1832.1.A1_AT	0.0066723
LES.2620.1.S1_AT	0.0066723
LES.3507.1.S1_AT	0.0066723
LES.4986.1.S1_AT	0.0066723
LES.636.1.S1_AT	0.0066723
LESAFFX.44021.1.S1_AT	0.00671164
LES.1091.1.A1_AT	0.00680067
LES.2115.3.A1_AT	0.00680067
LES.2270.1.S1_AT	0.00680067
LESAFFX.344.5.S1_AT	0.00680067
LES.1989.1.A1_AT	0.00682274
LES.4618.1.S1_AT	0.00691152
LESAFFX.35587.1.S1_AT	0.00691667
LES.2765.3.S1_A_AT	0.00693844
LES.1205.3.S1_AT	0.00694859
LES.4731.1.S1_AT	0.00694859
LES.3430.1.S1_AT	0.00701987
LES.1108.1.A1_AT	0.00702479
LES.1203.1.A1_AT	0.00711002
LES.2650.1.S1_AT	0.00711002
LES.5458.1.S1_AT	0.00711002
LESAFFX.43793.1.S1_AT	0.00711002
LESAFFX.67643.1.S1_AT	0.00713115
LES.1485.2.A1_AT	0.00721768
LESAFFX.10974.1.S1_AT	0.00722222
LESAFFX.3253.1.S1_AT	0.00722675
LES.2115.2.S1_A_AT	0.00726094
LES.2855.1.S1_AT	0.00726094
LES.444.1.S1_AT	0.00726094
LESAFFX.29252.1.S1_AT	0.00726094
LES.4149.2.S1_A_AT	0.00728155
LES.2169.2.S1_AT	0.00735056
LES.1073.1.S1_AT	0.00740323
LESAFFX.65372.2.S1_AT	0.00742351
LES.61.1.S1_AT	0.00744373
LES.3260.1.S1_AT	0.00759615
LESAFFX.69528.1.S1_AT	0.00759615
LES.4004.1.S1_A_AT	0.0076
LES.4508.2.S1_S_AT	0.00763955
LES.4769.1.S1_AT	0.00763955
LES.1049.1.S1_AT	0.00767772
LES.2485.1.A1_AT	0.00767772
LES.2980.1.S1_AT	0.00767772
LES.2988.1.S1_AT	0.00767772
LES.5940.1.S1_AT	0.00767772
LESAFFX.58502.1.S1_AT	0.00767772
LES.687.3.A1_AT	0.00768139
LESAFFX.63782.1.S1_AT	0.00773228
LESAFFX.66270.1.S1_AT	0.00789308
LES.3104.2.S1_AT	0.00794349
LES.3267.3.A1_AT	0.00805643
LES.5363.1.S1_AT	0.00810642
LES.5890.1.S1_AT	0.008125
LESAFFX.62071.1.S1_AT	0.00812792
LESAFFX.55639.1.S1_AT	0.00813084
LESAFFX.69325.1.S1_AT	0.00813375
LES.5124.1.S1_AT	0.00818885
LES.5682.1.S1_AT	0.00818885
LESAFFX.70188.1.S1_AT	0.00818885
LES.4508.1.S1_S_AT	0.00820711
LES.4316.1.S1_AT	0.00825617
LES.1558.1.S1_AT	0.00825886
LES.3268.1.S1_AT	0.00830275
LES.4476.1.S1_AT	0.00830275
LESAFFX.66001.1.S1_AT	0.00830275
LESAFFX.70928.1.S1_AT	0.00830275
LESAFFX.71077.1.S1_AT	0.00830275
LES.2649.1.S1_AT	0.00844749
LES.5662.1.S1_AT	0.00844749
LESAFFX.48738.1.S1_AT	0.00844749
LES.2909.1.S1_AT	0.00848024
LES.5485.1.S1_AT	0.00849772
LESAFFX.69997.2.S1_AT	0.0085
LES.1256.1.A1_AT	0.00856496
LES.4635.1.S1_AT	0.00856496
LES.2360.1.S1_AT	0.00867164
LES.3073.1.S1_AT	0.00867164
LES.3595.1.S1_AT	0.00867164
LES.4248.3.S1_AT	0.00867164
LES.4696.1.S1_AT	0.00867164
LES.4753.1.S1_AT	0.00867164
LES.5254.1.S1_A_AT	0.00867164
LESAFFX.36193.1.S1_AT	0.00867164
LES.3769.1.S1_AT	0.00868853
LES.966.1.S1_AT	0.00881129
LESAFFX.60966.2.S1_AT	0.00881129
LESAFFX.9910.1.S1_AT	0.00881306
LES.4036.1.S1_AT	0.00881482
LESAFFX.18906.1.S1_AT	0.00883136
LES.5862.1.S1_AT	0.0088938
LESAFFX.51274.1.S1_AT	0.0088938
LESAFFX.65332.1.S1_AT	0.00889543
LES.2924.1.S1_AT	0.0089083
LES.3217.1.S1_S_AT	0.0089083
LES.3488.1.S1_AT	0.0089083
LES.4586.1.S1_AT	0.0089083
LES.4736.1.S1_AT	0.0089083
LES.5771.1.S1_AT	0.0089083
LESAFFX.32359.1.S1_AT	0.0089083
LESAFFX.70097.1.S1_AT	0.0089083
LESAFFX.70371.1.S1_AT	0.00890988
LES.2751.1.A1_AT	0.00904209
LES.2182.1.A1_AT	0.00904899
LES.2722.3.A1_AT	0.00904899
LES.3463.1.S1_AT	0.00904899
LES.4461.1.S1_S_AT	0.00904899
LESAFFX.65240.1.S1_AT	0.00904899
LESAFFX.53821.1.S1_AT	0.00905036
LES.4807.1.S1_AT	0.00905172
LES.1444.1.S1_AT	0.00909742
LES.3087.2.S1_AT	0.00909742
LES.124.1.S1_AT	0.00912733
LES.4038.1.S1_AT	0.00912857
LES.173.1.S1_AT	0.0092068
LES.1829.1.S1_AT	0.0092068
LES.3562.1.S1_AT	0.0092068
LES.4344.1.S1_AT	0.0092068
LES.5510.1.S1_AT	0.0092068
LESAFFX.54347.3.S1_AT	0.0092068
LES.2294.2.A1_A_AT	0.00932299
LES.3512.1.S1_AT	0.00932299
LESAFFX.67113.1.S1_AT	0.00932299
LES.2718.3.S1_AT	0.00946554
LES.3267.2.S1_AT	0.00946554
LES.4233.2.A1_AT	0.00949438
LES.5008.1.S1_AT	0.00949509
LES.2313.1.A1_AT	0.00956704
LESAFFX.269.2.S1_AT	0.00956704
LESAFFX.54810.1.S1_AT	0.00956704
LES.1508.2.S1_AT	0.00960948
LES.1672.1.S1_AT	0.00961379
LES.1806.2.A1_AT	0.00961379
LES.2832.1.S1_AT	0.00961379
LES.3264.1.S1_AT	0.00961379
LES.3317.1.S1_AT	0.00961379
LES.4469.1.A1_AT	0.00961379
LES.62.1.S1_AT	0.00961379
LESAFFX.70769.1.S1_AT	0.00961379
LES.3146.2.S1_AT	0.00966942
LES.3098.1.S1_AT	0.00967033
LESAFFX.65080.1.A1_AT	0.00967033
LES.2267.1.S1_AT	0.00967078
LES.3530.1.S1_AT	0.00969945
LES.392.1.S1_AT	0.00969945
LESAFFX.61402.1.S1_AT	0.00969945
LES.3426.1.A1_AT	0.00970149
LES.915.1.S1_AT	0.00970149
LESAFFX.33757.1.S1_AT	0.00970149
LESAFFX.58308.1.S1_AT	0.00970149
LESAFFX.9043.1.S1_AT	0.00970149
LES.2040.1.A1_AT	0.00971545
LES.3279.1.A1_AT	0.00974324
LESAFFX.22483.1.S1_AT	0.00974324
LES.3154.1.A1_AT	0.00974359
LES.3998.1.S1_AT	0.00974462
LES.5279.1.S1_AT	0.00974462
LESAFFX.2889.4.S1_AT	0.00974462
LESAFFX.60762.1.S1_AT	0.00974497
LES.2115.2.S1_AT	0.00978552
LESAFFX.16884.1.S1_AT	0.00978581
LESAFFX.23969.1.A1_AT	0.0097861
LES.409.1.S1_AT	0.00979973
LESAFFX.3308.1.S1_AT	0.0098
LES.4271.1.S1_AT	0.00984021
LES.2851.1.A1_AT	0.0100265
LES.3262.3.S1_AT	0.0100265
LES.4067.1.S1_AT	0.0100265
LES.5936.1.S1_AT	0.0100265
LESAFFX.56301.1.S1_AT	0.0100265
LESAFFX.6688.1.S1_AT	0.0100793
LES.1393.1.S1_AT	0.0100921
LES.3470.1.S1_AT	0.0100921
LES.5283.1.S1_AT	0.0100921
LES.314.1.A1_AT	0.0101314
LES.4429.1.S1_AT	0.0101442
LES.605.2.S1_AT	0.0101442
LESAFFX.61336.1.S1_AT	0.0101832
LESAFFX.48130.1.S1_AT	0.0102219
LESAFFX.51292.1.S1_AT	0.0102219
LES.1954.1.S1_AT	0.0102323
LES.2903.1.S1_AT	0.0102323
LES.3174.1.S1_AT	0.0102323
LES.3384.2.A1_AT	0.0102323
LES.3590.1.S1_AT	0.0102323
LES.4379.2.S1_A_AT	0.0102323
LES.5882.1.A1_AT	0.0102323
LESAFFX.17522.1.S1_AT	0.0102323
LESAFFX.39072.1.S1_AT	0.0102323
LES.4277.3.S1_AT	0.0102448
LES.3289.1.S1_AT	0.010347
LESAFFX.12647.1.S1_AT	0.010347
LES.1852.3.S1_AT	0.0104231
LESAFFX.15284.1.S1_AT	0.0104231
LES.388.3.A1_AT	0.0104609
LES.5069.1.S1_AT	0.0105371
LES.4825.1.S1_AT	0.0105492
LES.300.2.S1_AT	0.0105598
LES.3267.2.S1_A_AT	0.0105598
LES.4287.1.S1_AT	0.0105598
LES.2281.1.S1_AT	0.0106353
LES.1393.2.A1_AT	0.0106464
LES.716.1.S1_AT	0.0106464
LES.228.1.S1_AT	0.010708
LES.281.3.S1_AT	0.010708
LES.1260.1.S1_AT	0.0107277
LES.2002.2.S1_AT	0.0107277
LES.4360.1.S1_AT	0.0107277
LESAFFX.1050.2.S1_AT	0.0107277
LESAFFX.2428.1.S1_AT	0.0107277
LESAFFX.2889.1.A1_AT	0.0107277
LES.1074.1.A1_AT	0.0107769
LES.3334.1.S1_AT	0.01085
LES.5163.1.S1_AT	0.01085
LES.5244.1.S1_AT	0.0108853
LESAFFX.1195.1.S1_AT	0.0108853
LESAFFX.15265.1.S1_AT	0.0109465
LES.101.1.S1_AT	0.011005
LES.367.1.A1_AT	0.011005
LES.4413.1.A1_AT	0.011005
LES.2891.1.S1_AT	0.0110409
LES.3392.2.S1_AT	0.0110767
LES.1250.3.A1_AT	0.0112114
LES.1528.1.A1_S_AT	0.0112222
LESAFFX.286.3.S1_A_AT	0.011233
LES.2206.1.S1_AT	0.0112562
LESAFFX.66175.1.S1_AT	0.0112669
LES.5251.1.S1_AT	0.0113022
LES.2960.2.S1_AT	0.0113097
LES.5683.1.S1_AT	0.0113097
LESAFFX.10444.1.S1_AT	0.0113097
LES.414.1.S1_AT	0.0113814
LES.2871.1.S1_AT	0.0114164
LES.1631.1.S1_AT	0.0114199
LES.209.1.S1_AT	0.0114199
LES.2975.2.S1_AT	0.0114199
LES.5289.1.S1_AT	0.0114199
LESAFFX.24384.1.S1_AT	0.0114199
LESAFFX.4779.1.S1_AT	0.0114788
LES.4334.2.S1_AT	0.0115012
LES.4608.1.S1_AT	0.0115115
LES.4623.1.S1_AT	0.0115338
LES.292.1.S1_AT	0.0116245
LES.4589.1.S1_AT	0.0116245
LESAFFX.71021.1.S1_AT	0.0116245
LES.4651.1.S1_AT	0.0117887
LES.827.1.S1_AT	0.0117887
LES.2335.1.A1_AT	0.0119065
LES.750.1.S1_AT	0.0119162
LES.3546.1.S1_AT	0.0119258
LES.190.1.S1_AT	0.0119713
LES.368.1.S1_AT	0.0120501
LES.5100.1.S1_AT	0.0120501
LES.230.1.S1_AT	0.0121284
LES.3019.2.S1_AT	0.0121284
LES.2986.1.S1_AT	0.0121496
LES.2422.1.S1_AT	0.0122301
LES.2541.2.S1_AT	0.0122867
LES.2582.1.S1_AT	0.0123204
LES.3594.1.S1_AT	0.0123204
LES.4040.1.S1_AT	0.0123204
LES.987.3.S1_AT	0.0123204
LESAFFX.60361.1.S1_AT	0.0123204
LES.3126.1.S1_AT	0.0123294
LESAFFX.3555.1.A1_AT	0.0123854
LES.5131.1.S1_AT	0.0124296
LES.3601.1.S1_S_AT	0.0124327
LESAFFX.59769.1.S1_AT	0.0124327
LESAFFX.70819.1.S1_AT	0.0124327
LES.4287.2.S1_AT	0.0124766
LESAFFX.3580.1.S1_AT	0.0125204
LES.1392.1.A1_AT	0.0125233
LES.1691.1.S1_AT	0.0125233
LESAFFX.55735.1.S1_AT	0.0125233
LES.4955.1.S1_AT	0.0126132
LES.3482.1.S1_AT	0.0126821
LES.4493.1.S1_AT	0.0126821
LESAFFX.58097.1.S1_AT	0.0126821
LESAFFX.65352.2.S1_AT	0.0126821
LES.1235.1.A1_AT	0.0127211
LES.2027.1.A1_S_AT	0.0127211
LES.2110.1.A1_AT	0.0127211
LES.2271.1.S1_AT	0.0127211
LES.2333.1.S1_AT	0.0127211
LES.2699.1.S1_AT	0.0127211
LES.3007.3.A1_AT	0.0127211
LES.3535.1.S1_AT	0.0127211
LES.3576.1.S1_AT	0.0127211
LES.4397.1.S1_AT	0.0127211
LES.5216.1.S1_AT	0.0127211
LES.5787.1.S1_AT	0.0127211
LES.5860.1.A1_AT	0.0127211
LESAFFX.17707.1.S1_AT	0.0127211
LESAFFX.19094.1.S1_AT	0.0127211
LESAFFX.24212.1.S1_AT	0.0127211
LESAFFX.68107.1.S1_AT	0.0127211
LES.5786.1.S1_AT	0.0127376
LESAFFX.55071.1.S1_AT	0.0127376
LESAFFX.38184.1.S1_AT	0.0127458
LES.3308.3.S1_AT	0.012754
LES.2754.1.S1_AT	0.0128072
LES.5948.1.S1_AT	0.0129054
LES.3734.1.S1_AT	0.0129068
LESAFFX.63775.1.S1_AT	0.0129068
LESAFFX.70855.1.S1_AT	0.0129068
LES.1609.1.S1_AT	0.0129115
LES.3264.3.S1_AT	0.0129115
LES.2022.1.S1_AT	0.0129754
LES.4539.1.S1_A_AT	0.0130726
LES.5637.1.S1_AT	0.0132553
LESAFFX.64234.1.S1_AT	0.0132553
LESAFFX.35132.1.S1_AT	0.0132962
LES.1684.1.A1_AT	0.0133407
LES.1987.1.S1_AT	0.0133407
LES.4840.1.S1_AT	0.0133407
LES.3007.2.S1_A_AT	0.0133739
LES.4641.1.S1_AT	0.0133739
LESAFFX.46624.1.S1_AT	0.0133739
LES.3721.1.S1_AT	0.0133885
LES.4087.1.S1_AT	0.0133885
LESAFFX.25627.1.S1_AT	0.0134396
LESAFFX.35149.1.S1_AT	0.0134396
LESAFFX.56.1.S1_AT	0.0134396
LESAFFX.65412.1.S1_AT	0.0134396
LES.32.1.S1_AT	0.0134539
LESAFFX.20929.1.S1_AT	0.0134539
LES.2620.3.S1_AT	0.013483
LES.1699.1.A1_AT	0.0136214
LES.1592.1.A1_AT	0.0136354
LES.423.1.S1_AT	0.0136354
LES.91.1.S1_AT	0.0136641
LES.2409.1.S1_AT	0.0137364
LES.2286.1.S1_AT	0.0138028
LES.2608.1.S1_AT	0.0138028
LES.417.1.S1_AT	0.0138028
LESAFFX.13805.1.S1_AT	0.0138028
LESAFFX.53811.1.S1_AT	0.0138028
LES.2417.1.S1_AT	0.013827
LES.4495.1.S1_AT	0.013827
LESAFFX.64962.1.S1_AT	0.0138661
LES.428.1.S1_AT	0.0139332
LES.5488.1.S1_AT	0.0139332
LES.3591.1.S1_AT	0.0139397
LES.3267.1.S1_AT	0.0141031
LES.5657.1.S1_AT	0.0141031
LES.87.1.S1_A_AT	0.0141202
LESAFFX.64902.2.S1_AT	0.0141586
LES.4767.1.S1_AT	0.014197
LES.2949.1.S1_AT	0.0142139
LES.2682.1.S1_AT	0.0142689
LES.4539.1.S1_AT	0.0142689
LES.4334.1.A1_AT	0.0142827
LES.4572.1.S1_AT	0.0142827
LES.5240.1.S1_AT	0.0142827
LESAFFX.30145.1.S1_AT	0.0142827
LES.2422.2.A1_AT	0.0143295
LES.2558.1.S1_AT	0.0143295
LES.2568.3.A1_AT	0.0143295
LES.3736.1.S1_AT	0.0143295
LES.5098.1.S1_AT	0.0143295
LES.5540.1.S1_AT	0.0143295
LES.4437.3.A1_AT	0.0143776
LES.967.1.A1_AT	0.0144046
LESAFFX.71238.1.S1_AT	0.0144526
LESAFFX.68556.1.S1_AT	0.014469
LESAFFX.66342.1.S1_AT	0.0145378
LES.3686.1.S1_AT	0.014596
LES.13.1.S1_AT	0.0146757
LES.3574.1.S1_AT	0.0146757
LESAFFX.9815.1.A1_AT	0.0146757
LES.3337.2.S1_AT	0.0147126
LES.2918.1.S1_AT	0.0147187
LES.4676.1.S1_AT	0.0147187
LES.4828.1.S1_AT	0.0147187
LESAFFX.56104.1.S1_AT	0.0148907
LES.4258.1.A1_AT	0.0149066
LESAFFX.25797.1.S1_AT	0.0149066
LESAFFX.54355.2.S1_AT	0.0149066
LES.4704.1.S1_AT	0.014907
LES.5537.1.S1_AT	0.014907
LES.5539.1.S1_AT	0.014907
LESAFFX.43670.1.S1_AT	0.014907
LESAFFX.51554.1.S1_AT	0.0150155
LESAFFX.18067.1.S1_AT	0.0151031
LES.5352.1.S1_AT	0.0151129
LES.5560.1.S1_AT	0.0151129
LESAFFX.62593.2.S1_AT	0.0151129
LESAFFX.66404.1.S1_AT	0.0151129
LES.3467.1.S1_AT	0.0151385
LES.4139.1.S1_AT	0.0152357
LES.5598.1.S1_AT	0.015261
LES.2692.1.A1_AT	0.0152863
LES.4990.1.S1_AT	0.0153013
LES.3352.1.S1_AT	0.0153109
LES.611.2.A1_AT	0.0153109
LES.2229.1.S1_AT	0.0153333
LES.2718.1.S1_AT	0.0153333
LES.2944.3.S1_AT	0.0153333
LES.2955.2.S1_AT	0.0153333
LES.3318.2.S1_AT	0.0153333
LES.3548.1.S1_AT	0.0153333
LES.4472.1.S1_AT	0.0153333
LES.934.1.S1_AT	0.0153333
LESAFFX.59256.1.S1_AT	0.0153333
LES.3545.1.S1_AT	0.015338
LESAFFX.34986.1.A1_AT	0.0154079
LESAFFX.730.3.S1_AT	0.0154079
LESAFFX.69747.1.S1_AT	0.0154326
LES.1081.1.S1_AT	0.0155321
LES.3550.1.S1_AT	0.0155321
LES.333.1.A1_AT	0.0155667
LES.3136.1.S1_AT	0.0155711
LES.5739.1.S1_AT	0.01559
LES.5852.3.S1_AT	0.01559
LESAFFX.11993.1.S1_AT	0.0156144
LES.1853.1.S1_AT	0.0156287
LES.2998.3.S1_AT	0.0156873
LES.4225.1.S1_AT	0.0156873
LES.3129.2.S1_AT	0.0157114
LES.3268.2.A1_AT	0.0157853
LES.2759.2.A1_AT	0.0157895
LES.5401.1.S1_AT	0.0157937
LES.3706.1.S1_AT	0.015887
LES.1323.1.S1_AT	0.0159248
LES.248.1.S1_A_AT	0.0159248
LES.1051.1.A1_AT	0.0159329
LES.4848.1.S1_AT	0.0159329
LES.323.1.S1_AT	0.0161144
LESAFFX.65208.1.S1_AT	0.0161182
LES.4242.2.S1_AT	0.0161516
LES.187.2.S1_AT	0.0161849
LES.4643.1.S1_AT	0.0161886
LES.4747.1.S1_AT	0.0161923
LES.5056.1.S1_A_AT	0.016288
LESAFFX.70072.1.S1_AT	0.016288
LES.1846.1.A1_AT	0.0163424
LES.2813.1.S1_AT	0.0163424
LES.3087.1.A1_AT	0.0163424
LES.4700.1.S1_AT	0.0163424
LESAFFX.57289.1.S1_AT	0.0163424
LESAFFX.58193.1.A1_AT	0.0163424
LESAFFX.62593.1.S1_AT	0.0163424
LES.3060.1.S1_AT	0.0163689
LES.54.1.S1_AT	0.0163689
LES.1863.1.S1_AT	0.0163725
LES.2704.2.S1_AT	0.0163892
LES.640.1.A1_AT	0.0163892
LES.2115.1.S1_AT	0.0164507
LES.2218.1.A1_AT	0.0164678
LESAFFX.1406.1.S1_S_AT	0.0164678
LESAFFX.59684.1.S1_AT	0.0164678
LESAFFX.71663.1.S1_AT	0.0164678
LESAFFX.81.2.S1_AT	0.0164678
LES.5056.1.S1_X_AT	0.0164938
LES.5588.1.S1_AT	0.0164938
LES.5068.1.S1_AT	0.0165643
LES.4649.1.S1_AT	0.0165772
LES.1217.3.A1_AT	0.0166285
LES.4275.1.S1_AT	0.0166285
LES.4916.1.S1_AT	0.0166285
LESAFFX.24799.2.S1_AT	0.0166285
LESAFFX.66767.1.S1_AT	0.0168702
LES.1143.1.A1_AT	0.0169434
LES.2584.1.A1_AT	0.0169434
LES.2689.1.A1_AT	0.0169434
LES.2708.1.S1_AT	0.0169434
LES.4754.1.S1_AT	0.0169434
LES.5115.1.S1_AT	0.0169434
LESAFFX.24204.1.S1_AT	0.0169434
LESAFFX.3163.1.S1_AT	0.0169434
LESAFFX.3377.1.S1_AT	0.0169434
LESAFFX.48349.1.S1_AT	0.0169434
LESAFFX.69732.1.S1_AT	0.0169434
LESAFFX.71107.1.S1_AT	0.0169434
LES.5826.1.S1_AT	0.0170311
LES.2523.1.A1_AT	0.017081
LES.4934.1.S1_AT	0.0171402
LESAFFX.6338.1.S1_AT	0.0172462
LES.4876.1.S1_AT	0.0172864
LES.5512.1.S1_AT	0.0173664
LES.5750.1.S1_AT	0.0173664
LES.2460.2.S1_AT	0.0173783
LES.3050.1.S1_AT	0.0174088
LES.1078.1.A1_AT	0.0174953
LES.683.2.S1_AT	0.0174953
LESAFFX.50112.1.S1_AT	0.0174953
LESAFFX.58583.1.S1_A_AT	0.0174953
LESAFFX.60564.1.S1_AT	0.0174953
LES.726.1.S1_AT	0.0175535
LES.310.1.A1_AT	0.0175651
LES.4781.1.S1_AT	0.0175718
LES.501.2.A1_AT	0.0175718
LES.5400.1.S1_AT	0.0175718
LES.4553.1.S1_AT	0.0175741
LES.2349.1.S1_AT	0.0176596
LES.90.1.S1_AT	0.0177193
LESAFFX.30767.1.S1_AT	0.0177193
LES.1158.1.S1_AT	0.0177768
LES.2791.1.S1_AT	0.0178177
LESAFFX.67471.1.S1_AT	0.0178177
LES.5816.1.S1_AT	0.0178289
LES.1213.1.A1_AT	0.0178349
LES.2613.2.S1_A_AT	0.0178349
LES.2909.2.S1_AT	0.0178349
LES.2565.3.S1_AT	0.017846
LES.2768.1.S1_AT	0.017848
LES.5854.1.S1_AT	0.01785
LES.2957.1.A1_AT	0.0179068
LESAFFX.4388.1.S1_AT	0.0179087
LES.4493.3.S1_AT	0.017938
LESAFFX.70144.1.S1_AT	0.0180675
LESAFFX.8808.2.A1_AT	0.0180783
LES.3018.1.S1_AT	0.0183258
LES.2189.1.S1_AT	0.0184091
LES.1052.1.A1_AT	0.018495
LES.3280.1.A1_AT	0.018495
LES.4628.1.S1_AT	0.018495
LES.3160.3.S1_AT	0.0185054
LES.2700.1.S1_AT	0.018543
LESAFFX.16442.1.A1_AT	0.0186347
LES.221.1.S1_AT	0.018636
LES.1603.1.A1_AT	0.0187556
LESAFFX.9245.1.S1_AT	0.0187556
LES.5157.1.S1_AT	0.0187568
LESAFFX.33335.1.S1_AT	0.0187759
LES.3973.1.S1_AT	0.0188309
LES.2815.1.S1_AT	0.018852
LES.3755.1.A1_AT	0.018852
LES.4708.1.S1_AT	0.018852
LESAFFX.70036.1.S1_AT	0.018862
LES.2416.1.S1_AT	0.0189893
LES.5000.1.S1_AT	0.0189893
LESAFFX.3501.1.S1_AT	0.019008
LES.4301.1.S1_AT	0.0190089
LES.2942.2.S1_AT	0.0190205
LES.3712.1.S1_AT	0.0190205
LES.4277.2.S1_AT	0.0190205
LES.1736.1.A1_AT	0.0190506
LES.2667.1.S1_AT	0.0190506
LES.3416.1.S1_AT	0.0190506
LES.4852.1.S1_AT	0.0190506
LES.4748.1.S1_AT	0.0191312
LES.3041.1.S1_AT	0.0191851
LES.3924.1.S1_AT	0.0191858
LES.5307.1.S1_AT	0.0192314
LESAFFX.2226.2.A1_AT	0.0192314
LES.1884.3.A1_AT	0.0192375
LES.283.1.S1_AT	0.0192375
LES.4519.2.S1_AT	0.0192375
LES.5015.1.S1_AT	0.0192375
LES.5198.1.S1_AT	0.0192375
LES.5884.1.S1_AT	0.0192375
LESAFFX.24206.1.S1_AT	0.0192375
LESAFFX.26489.1.S1_AT	0.0192375
LESAFFX.68259.1.S1_AT	0.0192375
LESAFFX.59008.1.S1_AT	0.0192732
LES.733.1.S1_AT	0.0193263
LES.3248.2.S1_AT	0.0193712
LESAFFX.2072.1.S1_AT	0.0193712
LES.4397.2.A1_AT	0.0194066
LES.587.1.S1_AT	0.0194682
AFFX-LES-EF1A-5_X_AT	0.0194774
LESAFFX.10323.1.A1_AT	0.0196432
LESAFFX.20450.1.S1_AT	0.0197043
LES.2373.1.S1_AT	0.0197398
LES.3522.1.S1_AT	0.0197398
LESAFFX.70733.1.S1_AT	0.0197398
LES.1990.1.S1_AT	0.0197489
LES.4011.2.S1_AT	0.0197489
LES.5513.1.S1_AT	0.0197751
LES.1323.2.A1_AT	0.0198617
LESAFFX.23154.1.S1_AT	0.0199223
LES.2287.3.A1_AT	0.0199828
LES.4526.1.S1_AT	0.0199828
LESAFFX.56547.3.A1_AT	0.0199828
LESAFFX.10289.1.A1_AT	0.0202238
LES.2767.1.S1_AT	0.0203267
LES.5239.1.S1_AT	0.0203866
LES.502.2.S1_AT	0.0204202
LESAFFX.47540.1.S1_AT	0.0204202
LES.2602.1.S1_AT	0.0204627
LESAFFX.20534.1.S1_AT	0.0205565
LESAFFX.7177.1.S1_AT	0.0205731
LES.4654.1.S1_AT	0.0206752
LES.3366.2.S1_A_AT	0.0208177
LESAFFX.1244.2.A1_AT	0.0208177
LESAFFX.27809.1.S1_AT	0.0208177
LESAFFX.69803.1.S1_AT	0.0208177
LES.1817.1.S1_AT	0.0208426
LES.584.1.A1_AT	0.0209694
LES.2476.1.S1_AT	0.0210611
LES.3399.2.S1_AT	0.0210611
LES.2496.2.S1_AT	0.0210763
LES.2521.1.S1_AT	0.0210763
LES.2220.1.A1_AT	0.0210998
LES.418.1.S1_AT	0.0210998
LESAFFX.64357.1.S1_AT	0.0211074
LES.1498.1.S1_AT	0.0211755
LES.2198.2.A1_AT	0.0211755
LES.3292.1.A1_AT	0.0211755
LES.3626.1.S1_AT	0.0211755
LES.433.2.S1_AT	0.0211755
LES.4730.1.S1_AT	0.0211755
LESAFFX.23154.2.S1_AT	0.0211755
LESAFFX.39915.1.S1_AT	0.0211755
LESAFFX.39054.1.S1_AT	0.0212081
LES.411.1.S1_AT	0.0212814
LESAFFX.53966.1.S1_AT	0.0212814
LESAFFX.66600.1.S1_AT	0.0213054
LES.321.1.S1_AT	0.0213712
LESAFFX.68271.1.S1_AT	0.0214202
LES.3202.1.S1_AT	0.021463
LES.3869.1.S1_AT	0.021463
LES.455.3.S1_AT	0.021463
LES.4667.1.S1_AT	0.021463
LES.468.1.S1_AT	0.021463
LES.5412.1.S1_AT	0.021463
LES.3401.3.S1_AT	0.0216003
LES.747.1.S1_AT	0.0216003
LESAFFX.69659.2.S1_AT	0.0216003
LES.128.1.S1_AT	0.0216819
LESAFFX.5719.1.S1_AT	0.0217632
LES.176.1.S1_AT	0.0217657
LES.2518.1.A1_AT	0.0217657
LES.3123.1.S1_AT	0.0217657
LES.5350.1.S1_AT	0.0217657
LES.1113.1.A1_AT	0.0218077
LES.195.1.S1_AT	0.0218077
LES.3380.1.S1_AT	0.0218077
LES.4796.1.S1_AT	0.0218077
LESAFFX.4544.1.S1_AT	0.0218077
LES.1640.1.A1_AT	0.0218197
LES.1862.1.A1_AT	0.0218197
LES.5654.1.S1_AT	0.0218197
LES.2708.2.S1_AT	0.0218346
LESAFFX.11542.1.S1_AT	0.0219885
LES.3101.3.A1_AT	0.0220098
LES.4523.1.S1_AT	0.0220098
LES.5325.1.S1_AT	0.022049
LES.574.1.S1_AT	0.0220799
LES.1081.3.A1_AT	0.0221335
LES.3149.3.S1_AT	0.0221335
LES.2844.1.S1_AT	0.0221644
LES.413.1.S1_S_AT	0.0221789
LESAFFX.10175.1.S1_AT	0.0222746
LES.3285.1.S1_AT	0.0222871
LESAFFX.35363.1.S1_AT	0.0222871
LESAFFX.17129.1.S1_AT	0.0222996
LESAFFX.58110.1.S1_AT	0.0222996
LESAFFX.30832.1.S1_AT	0.0223705
LES.5885.2.S1_AT	0.0224252
LESAFFX.67585.1.S1_AT	0.0224313
LES.3206.1.S1_AT	0.022502
LES.3996.1.S1_AT	0.0227617
LES.4925.1.S1_AT	0.0227617
LESAFFX.68257.2.S1_AT	0.0227617
LES.3817.1.S1_AT	0.0228193
LESAFFX.21603.1.S1_AT	0.0228193
LESAFFX.47140.1.S1_AT	0.0228193
LES.3082.1.S1_AT	0.0228331
LES.266.1.S1_AT	0.0228549
LES.2884.1.S1_AT	0.0229006
LESAFFX.23109.1.S1_AT	0.0229704
LES.5217.1.S1_AT	0.023008
LES.4517.2.S1_AT	0.0231175
LES.5202.1.S1_AT	0.0231499
LES.5610.1.S1_AT	0.0231499
LESAFFX.66367.1.S1_AT	0.0231499
LES.1929.1.A1_AT	0.0233147
LES.2548.3.S1_AT	0.0233838
LESAFFX.65433.1.S1_AT	0.0234368
LES.2119.1.A1_S_AT	0.023471
LESAFFX.60439.1.S1_AT	0.023471
LES.5048.1.S1_AT	0.0235317
LES.2634.2.A1_AT	0.0235364
LES.3185.2.S1_AT	0.0235364
LES.5857.1.S1_AT	0.0235364
LESAFFX.65207.2.S1_AT	0.0235364
LES.2977.1.S1_AT	0.0235489
LES.3374.1.S1_AT	0.0235489
LES.4101.2.S1_A_AT	0.0235489
LES.4824.1.S1_AT	0.0235489
LES.1462.1.A1_AT	0.0236164
LES.5541.1.S1_AT	0.0236164
LES.5924.1.S1_AT	0.0236164
LESAFFX.24128.1.S1_AT	0.0236164
LES.1924.1.S1_AT	0.0236764
LES.4671.1.S1_AT	0.023697
LES.3624.1.S1_AT	0.0237226
LESAFFX.44528.1.S1_AT	0.0237226
LES.4775.1.S1_AT	0.023751
LESAFFX.16207.1.S1_AT	0.0237559
LES.2012.1.S1_AT	0.0238546
LES.3751.1.S1_AT	0.023869
LESAFFX.50466.1.S1_AT	0.023869
LESAFFX.68568.2.S1_AT	0.023869
LESAFFX.65478.1.S1_AT	0.0239517
LES.1374.1.A1_AT	0.0239891
LES.2592.1.S1_AT	0.0239891
LES.5702.1.S1_AT	0.0239891
LES.2103.1.A1_AT	0.0240528
LES.4076.1.S1_AT	0.0240528
LESAFFX.62189.1.S1_AT	0.0240884
LES.3306.1.S1_AT	0.0241008
LES.4594.1.S1_AT	0.0241208
LES.4564.1.S1_AT	0.0241641
LESAFFX.42421.1.S1_AT	0.0241686
LESAFFX.13721.1.S1_AT	0.0241808
AFFX-LE_GLUTTRANS_3_AT	0.0242296
LES.1971.1.S1_AT	0.0242296
LES.4336.1.S1_AT	0.0242296
LESAFFX.55883.1.S1_AT	0.0242296
LES.257.1.S1_AT	0.0242494
AFFX-LES-EF1A-5_A_AT	0.0242506
LES.2225.1.S1_AT	0.0242506
LES.2868.1.S1_AT	0.0242671
LESAFFX.22898.1.S1_AT	0.0242671
LES.2873.1.S1_AT	0.0243175
LES.4673.1.S1_AT	0.0243602
LES.2403.1.S1_AT	0.0244495
LES.5043.1.S1_AT	0.0244495
LES.5867.1.S1_AT	0.0244495
LES.3569.1.S1_AT	0.0245073
LES.579.1.S1_AT	0.0245344
LES.2584.2.S1_AT	0.0246148
LESAFFX.2246.1.S1_AT	0.024657
LESAFFX.71301.1.S1_AT	0.0248819
LES.5153.1.S1_AT	0.0248935
LES.4499.1.S1_AT	0.0249278
LES.3421.2.S1_AT	0.0249848
LES.3700.1.S1_AT	0.0250038
LES.1577.1.A1_AT	0.0250796
LES.2677.3.S1_AT	0.0250796
LES.5465.1.S1_AT	0.0250833
LES.2620.2.S1_AT	0.0251022
LESAFFX.70335.1.S1_AT	0.025174
LES.4847.1.S1_AT	0.0252568
LES.505.1.S1_AT	0.0252568
LES.2298.2.A1_A_AT	0.0253208
LES.5411.1.S1_AT	0.0255053
LES.249.1.S1_AT	0.0256066
LES.5942.1.S1_AT	0.025625
LES.3062.1.S1_AT	0.0256283
LES.1703.1.S1_AT	0.0257025
LESAFFX.15878.2.A1_AT	0.0257025
LES.5259.1.S1_AT	0.0257132
LES.325.3.A1_A_AT	0.0258096
LES.4392.1.A1_AT	0.0258096
LES.2355.1.S1_AT	0.0258202
LES.2923.1.S1_AT	0.0258533
LES.5550.1.S1_AT	0.0259118
LES.605.1.S1_AT	0.0259118
LES.1307.1.A1_AT	0.0259135
LES.4504.1.A1_AT	0.0259135
LESAFFX.69023.1.S1_AT	0.0259135
LES.1450.1.S1_AT	0.0259762
LES.2591.1.S1_AT	0.0259866
LES.324.1.S1_AT	0.0260104
LESAFFX.1305.1.S1_AT	0.0260104
LESAFFX.44604.1.S1_AT	0.0260104
LES.1434.2.A1_AT	0.0260519
LES.4369.1.S1_S_AT	0.0260519
LES.4712.1.S1_AT	0.0260519
LESAFFX.15850.2.A1_AT	0.0260519
LES.1733.1.A1_AT	0.0261214
LES.1243.1.A1_AT	0.02625
LESAFFX.30544.1.S1_AT	0.0262823
LES.247.1.S1_A_AT	0.0262952
LES.3155.1.S1_AT	0.0262952
LES.1510.2.A1_AT	0.0262979
LES.1437.1.A1_AT	0.0263154
LES.3766.1.S1_AT	0.0263355
LESAFFX.66757.1.S1_AT	0.0263355
LES.5810.1.S1_AT	0.0263409
LESAFFX.70234.1.S1_AT	0.0263409
LES.4554.1.S1_AT	0.026493
LESAFFX.71578.1.S1_AT	0.026493
LES.71.1.S1_AT	0.0265176
LESAFFX.67103.2.S1_AT	0.0266081
LES.5461.1.S1_AT	0.0266569
LESAFFX.44417.1.S1_AT	0.0266569
LES.2601.1.S1_AT	0.0266594
LES.3540.1.S1_AT	0.0266594
LES.5312.1.S1_AT	0.0266594
LESAFFX.10346.1.A1_AT	0.0266594
LES.618.1.A1_AT	0.0266691
LES.4784.1.S1_AT	0.0269192
LES.4356.2.S1_AT	0.0269287
AFFX-LES-EF1A-5_AT	0.0269309
LES.696.1.A1_AT	0.0269404
LES.5264.1.S1_AT	0.027037
LES.5403.1.S1_AT	0.0270827
LES.1244.1.S1_AT	0.0271936
LES.5958.1.S1_AT	0.0272174
LES.1129.1.S1_AT	0.0273208
LES.669.2.S1_AT	0.0273734
LES.4795.1.S1_AT	0.0274403
LES.1977.1.S1_AT	0.0274855
LES.4353.1.S1_AT	0.0275685
LESAFFX.3079.1.S1_AT	0.0275685
LES.1401.1.S1_AT	0.0275937
LES.5374.1.S1_AT	0.0275937
LESAFFX.58283.3.S1_AT	0.027689
LES.4535.1.S1_AT	0.0277122
LES.5823.1.S1_AT	0.0277283
LES.5515.1.S1_AT	0.027967
LES.4792.1.S1_AT	0.0280761
LES.2034.3.A1_AT	0.0280846
LES.5452.1.S1_AT	0.028172
LES.2407.1.S1_AT	0.0281805
LESAFFX.21441.2.S1_AT	0.0282176
LES.4492.3.S1_AT	0.0282189
AFFX-LE_GLUTTRANS_M_R_AT	0.028263
LES.3030.1.A1_AT	0.0282929
LES.2092.1.S1_AT	0.0285064
LES.4459.1.S1_S_AT	0.0285064
LES.4773.1.S1_AT	0.0285064
LES.4849.1.S1_AT	0.0285064
LESAFFX.44395.1.S1_AT	0.0285064
LESAFFX.71551.2.S1_AT	0.0285064
LES.1467.1.A1_AT	0.0285542
LES.5187.1.S1_AT	0.0285542
LES.5265.1.S1_AT	0.0285542
LESAFFX.30900.1.S1_AT	0.0285542
LESAFFX.46010.1.S1_AT	0.0285542
LESAFFX.17773.1.S1_AT	0.0285552
LESAFFX.21803.1.S1_AT	0.0285704
LESAFFX.17080.1.S1_AT	0.0286634
LES.3689.1.S1_AT	0.0287156
LES.5628.1.S1_AT	0.0287156
LESAFFX.63412.1.S1_AT	0.0287156
LES.2944.1.A1_AT	0.0287447
LES.3378.2.S1_AT	0.0288169
LES.4881.1.S1_AT	0.0288169
LES.4867.1.S1_AT	0.0288388
LESAFFX.70563.1.S1_AT	0.0288537
LES.5761.1.S1_AT	0.0288686
LES.2753.1.S1_AT	0.0289326
LES.2733.1.S1_AT	0.0289474
LES.3969.1.S1_AT	0.0291801
LES.4826.1.S1_AT	0.0291801
LES.3163.3.S1_AT	0.0291877
LES.5489.1.S1_AT	0.0292448
LES.557.1.S1_AT	0.0292448
LES.5260.1.S1_AT	0.0295185
LESAFFX.70708.1.S1_AT	0.0295185
LESAFFX.71000.1.S1_AT	0.0295185
LESAFFX.14782.2.A1_AT	0.029561
LESAFFX.42561.1.S1_AT	0.029561
LESAFFX.34390.1.S1_AT	0.0295961
LES.3402.1.S1_AT	0.0296799
LES.1181.1.A1_AT	0.0297844
LES.2918.2.S1_AT	0.0299654
LES.3029.1.S1_AT	0.0299654
LESAFFX.14776.1.S1_AT	0.0299654
LESAFFX.71662.1.S1_S_AT	0.0299654
LESAFFX.9007.1.S1_AT	0.0299654
LES.720.1.A1_AT	0.0299792
LES.4517.3.S1_AT	0.0299862
LES.3456.1.S1_AT	0.0299862
LES.482.1.S1_AT	0.0299862
LES.5790.1.S1_AT	0.0299862
LES.5600.1.S1_AT	0.03
LESAFFX.30683.1.S1_AT	0.03
LES.1399.1.A1_AT	0.0300138
LES.2044.2.S1_AT	0.0300138
LESAFFX.55870.1.S1_AT	0.0300482
LESAFFX.62783.1.S1_AT	0.0303232
AFFX-LES-EF1A-M_A_AT	0.030364
LES.949.1.S1_AT	0.030364
LESAFFX.13593.1.S1_AT	0.0304324
LES.2765.1.A1_AT	0.0305003
LES.5183.1.S1_AT	0.0305003
LES.1441.1.S1_AT	0.0305068
LESAFFX.68491.1.S1_AT	0.0306708
LES.5095.1.S1_AT	0.0307382
LESAFFX.26108.1.S1_AT	0.0307382
LES.2002.1.S1_AT	0.0310861
LES.53.1.S1_AT	0.0311399
LES.5476.1.S1_AT	0.031146
LES.605.3.A1_AT	0.0312406
LES.5864.1.S1_AT	0.031273
LESAFFX.1064.1.S1_AT	0.031273
LESAFFX.3572.1.S1_AT	0.0313469
LES.1781.1.S1_A_AT	0.0314286
LES.3104.1.S1_AT	0.0314286
LESAFFX.47278.1.S1_AT	0.0314286
LESAFFX.51279.1.S1_AT	0.0314286
LESAFFX.56390.2.S1_AT	0.0314286
LESAFFX.63895.1.S1_AT	0.0314286
LESAFFX.70635.1.S1_AT	0.0314286
LES.2644.2.S1_AT	0.0315223
LES.2538.1.A1_AT	0.0315473
LES.5584.1.S1_AT	0.0315473
LES.2541.1.A1_AT	0.0315768
LESAFFX.12576.1.S1_AT	0.0315768
LESAFFX.26378.1.S1_AT	0.0315768
LESAFFX.71495.1.S1_AT	0.0315768
LES.2880.2.S1_AT	0.0316073
LESAFFX.39266.1.S1_AT	0.0316073
LESAFFX.44472.1.S1_AT	0.0316073
LES.2101.1.A1_A_AT	0.0316185
LES.5296.1.S1_AT	0.0316185
LES.4893.1.S1_AT	0.0318658
LES.2839.1.S1_AT	0.0319249
LES.266.1.S1_A_AT	0.0320442
LES.1914.1.S1_AT	0.0321017
LES.2813.2.A1_AT	0.0321017
LES.3282.3.S1_AT	0.0321204
LES.4544.1.S1_AT	0.0321495
LES.4642.1.S1_AT	0.0321495
LES.940.1.A1_AT	0.0321495
LES.4688.1.S1_AT	0.0321733
LES.964.1.S1_AT	0.0321733
LESAFFX.56.15.A1_AT	0.0322385
LES.4797.1.S1_AT	0.0322555
LESAFFX.45315.4.S1_AT	0.0322555
LESAFFX.5957.1.S1_AT	0.0323604
LES.1155.1.S1_AT	0.0323787
LES.2604.1.A1_AT	0.0324037
LESAFFX.13683.1.S1_AT	0.0324088
LESAFFX.5017.1.S1_AT	0.0324735
LES.3382.1.A1_AT	0.0325249
LES.3383.1.S1_AT	0.0326075
LES.4961.1.S1_AT	0.0326075
LES.1103.1.A1_AT	0.0326684
LES.3619.1.S1_AT	0.0326684
LES.501.1.A1_A_AT	0.0326684
LESAFFX.28874.1.S1_AT	0.0327855
LES.1654.1.A1_AT	0.033153
LES.3170.2.S1_AT	0.0331839
LESAFFX.16928.1.A1_AT	0.0332806
LES.243.1.S1_AT	0.0333114
LESAFFX.2889.2.S1_AT	0.0334211
LES.5780.1.S1_AT	0.0334977
LES.352.1.S1_AT	0.0335151
LES.638.1.S1_AT	0.0335827
LESAFFX.64546.1.S1_AT	0.0335827
LES.146.1.S1_AT	0.0336852
LES.2681.1.A1_AT	0.0337541
LES.2857.1.S1_AT	0.0337541
LES.2874.2.S1_AT	0.0337541
LESAFFX.69237.1.S1_AT	0.0337541
LESAFFX.65023.1.S1_AT	0.0338562
LES.4150.1.S1_AT	0.0339661
LES.4968.1.S1_S_AT	0.0339661
LES.5074.1.S1_AT	0.0339661
LES.3148.2.S1_AT	0.0340743
LES.135.1.S1_AT	0.034228
LES.1226.1.S1_AT	0.0343099
LESAFFX.65030.1.S1_AT	0.0343266
LESAFFX.9508.1.S1_AT	0.0343303
LES.3175.1.S1_AT	0.0343478
LES.4607.1.S1_AT	0.0343478
LES.5454.1.S1_AT	0.0343478
LES.1131.1.S1_AT	0.0343984
LES.1394.1.A1_AT	0.0343984
LES.2652.1.S1_AT	0.0343984
LES.4910.1.S1_AT	0.0343984
LES.4942.1.S1_AT	0.0343984
LES.4011.1.A1_AT	0.0343992
LES.4822.1.S1_AT	0.0343992
LES.3344.1.A1_AT	0.0344028
LES.4073.1.S1_AT	0.0345032
LES.4657.1.S1_AT	0.0345132
LESAFFX.14665.2.S1_AT	0.0345168
LES.325.1.A1_AT	0.0345525
LESAFFX.68373.1.S1_AT	0.0345753
LES.1827.1.A1_AT	0.0345793
LES.2993.2.S1_AT	0.0345793
LES.5522.1.S1_AT	0.0345793
LES.263.1.S1_AT	0.0345828
LES.5172.1.S1_AT	0.0347372
LESAFFX.60693.1.S1_AT	0.0347372
LES.4760.1.S1_AT	0.0348751
LES.2297.1.S1_AT	0.0349104
LES.1723.1.A1_AT	0.035
LES.2618.1.S1_AT	0.035
LES.3214.2.S1_AT	0.035
LES.3679.1.S1_AT	0.035
LES.4217.1.S1_AT	0.035
LESAFFX.64054.3.S1_AT	0.035
LES.5108.1.S1_AT	0.0353027
LES.4650.1.S1_AT	0.0353185
LESAFFX.70280.1.S1_AT	0.0353342
LESAFFX.10497.2.A1_AT	0.0353435
LES.4606.1.S1_AT	0.0354355
LES.2213.1.S1_S_AT	0.0354965
LES.3260.3.A1_AT	0.0354965
LES.3471.1.S1_AT	0.0354965
LES.3670.1.S1_AT	0.0354965
LES.4567.1.S1_AT	0.0354965
LESAFFX.34084.1.S1_AT	0.0354965
LESAFFX.70627.2.S1_AT	0.0354965
LESAFFX.71558.1.S1_AT	0.0354965
LES.3995.1.S1_AT	0.0355183
LES.4556.1.S1_AT	0.0356412
LES.252.1.S1_AT	0.0357008
LES.30.1.A1_AT	0.0357035
LES.2460.1.S1_AT	0.0357818
LES.5323.1.S1_AT	0.0358664
LES.240.1.S1_AT	0.0358905
LESAFFX.64675.1.S1_A_AT	0.0358905
LES.333.2.S1_AT	0.0358931
LES.5404.1.S1_AT	0.0359145
LES.4777.1.S1_AT	0.0359925
LES.4082.1.S1_AT	0.0361205
LES.247.1.S1_AT	0.0361355
LES.2033.1.A1_A_AT	0.0361442
LES.2734.2.S1_AT	0.0362539
LES.4546.1.S1_AT	0.0362539
LES.886.1.A1_AT	0.0362539
LESAFFX.38438.1.S1_AT	0.0362539
LES.4794.1.S1_AT	0.0362609
LES.5470.1.S1_AT	0.0362609
LESAFFX.59375.2.S1_AT	0.0362609
LES.4307.1.S1_AT	0.0362757
LESAFFX.34603.1.S1_AT	0.0365212
LES.8.1.S1_AT	0.0365545
LES.3563.1.S1_AT	0.0368057
LES.2691.1.S1_AT	0.0368388
LES.1241.1.S1_AT	0.0369006
LES.1444.2.A1_AT	0.0369006
LESAFFX.63947.2.S1_AT	0.0369006
LES.5346.1.S1_AT	0.0371695
LES.3187.1.S1_AT	0.0372208
LES.4599.1.S1_AT	0.0372226
LES.5228.1.A1_AT	0.0372553
LES.2667.2.S1_AT	0.0373177
LES.3392.1.A1_AT	0.0373177
LES.5535.1.S1_AT	0.0373177
LESAFFX.62847.2.S1_AT	0.0373177
LES.3279.2.S1_AT	0.0373502
LES.3344.3.S1_AT	0.0376111
LES.2954.2.A1_AT	0.0377421
LES.4001.1.S1_AT	0.0377805
LES.3971.2.S1_A_AT	0.0377819
LESAFFX.61614.1.S1_AT	0.0378079
LESAFFX.53781.1.S1_AT	0.0379015
LES.3691.1.S1_AT	0.0379336
LES.2489.1.S1_AT	0.0379361
LES.4638.1.S1_AT	0.0379361
LESAFFX.21675.1.S1_AT	0.0379619
LESAFFX.31364.1.S1_AT	0.0380368
LESAFFX.47666.1.S1_AT	0.0380687
LESAFFX.41477.1.S1_AT	0.0381127
LES.5558.1.S1_AT	0.0381629
LES.3401.2.S1_AT	0.0382864
LES.3179.2.S1_AT	0.0383425
LES.3337.3.S1_AT	0.0383557
LES.5011.1.S1_AT	0.038369
LES.4270.1.S1_AT	0.0384493
LES.2329.1.A1_AT	0.0385
LESAFFX.68367.1.S1_AT	0.0385
AFFX-LE_25SRRNA_AT	0.0385679
LESAFFX.67291.1.S1_AT	0.0386175
LES.2494.1.S1_AT	0.0386444
LESAFFX.32705.1.S1_S_AT	0.0386444
LESAFFX.63216.1.S1_AT	0.0386444
LES.1159.2.A1_AT	0.0386452
LESAFFX.20429.1.S1_AT	0.038659
LESAFFX.69215.1.S1_AT	0.038659
LES.4433.1.S1_AT	0.0387644
LES.4504.2.S1_AT	0.0387644
LESAFFX.5917.1.S1_AT	0.0387644
LES.5218.1.S1_AT	0.0388257
LES.734.1.S1_AT	0.0389474
LES.4548.1.S1_AT	0.038948
LES.602.1.A1_AT	0.0389728
LES.4827.1.S1_AT	0.0389734
LES.228.1.S1_A_AT	0.0391008
LESAFFX.5017.3.S1_AT	0.0391435
LES.182.1.S1_AT	0.039241
LESAFFX.67281.1.S1_AT	0.039241
LES.3247.1.S1_AT	0.0393197
LESAFFX.30869.1.S1_AT	0.0393205
LESAFFX.57287.2.S1_AT	0.0393205
LES.4272.1.A1_AT	0.0394535
LES.4744.1.S1_AT	0.0394535
LES.4737.1.S1_AT	0.0394718
LES.5379.1.S1_AT	0.0394841
LESAFFX.64328.2.S1_AT	0.0394844
LESAFFX.60722.1.S1_AT	0.0395027
LES.2896.1.S1_AT	0.039509
LES.161.1.S1_AT	0.0395931
LES.1321.1.S1_AT	0.0395995
LES.3167.1.S1_AT	0.0395995
LESAFFX.3000.1.S1_AT	0.0396296
LES.112.1.S1_AT	0.0397255
LESAFFX.60109.1.S1_AT	0.0397255
LES.4912.1.S1_AT	0.0397794
LESAFFX.59648.1.S1_AT	0.0397974
LES.2177.1.A1_AT	0.0398038
LES.222.2.A1_AT	0.0398038
LES.4914.1.S1_AT	0.0398038
LES.94.1.S1_AT	0.0398038
LES.3537.1.S1_AT	0.0398039
LESAFFX.42855.1.S1_AT	0.0398575
LES.5738.1.S1_AT	0.0399881
LES.1635.1.S1_AT	0.0401542
LES.2568.2.S1_AT	0.0402134
LES.1531.1.S1_AT	0.0402188
LES.3071.1.S1_AT	0.0402188
LESAFFX.10880.1.S1_AT	0.0402188
LESAFFX.16952.1.S1_AT	0.0402188
LES.3146.3.S1_AT	0.0403073
LES.476.2.S1_AT	0.0403544
LES.5437.1.S1_AT	0.0403719
LES.4497.1.S1_AT	0.0405074
LES.1616.2.S1_AT	0.0407311
LES.251.1.S1_AT	0.0408191
LES.4485.1.S1_AT	0.0409364
LES.3233.1.S1_AT	0.0409947
LES.4285.1.S1_S_AT	0.0410294
LES.5830.1.S1_AT	0.0410406
LES.5674.1.S1_AT	0.0410693
LES.1456.1.A1_AT	0.0411644
LES.196.1.S1_AT	0.0411644
LES.2729.2.S1_AT	0.0411644
LES.3068.1.S1_AT	0.0411644
LES.735.2.A1_AT	0.0411644
LESAFFX.31317.15.S1_AT	0.0411644
LESAFFX.59705.1.S1_AT	0.0411644
LES.3390.1.S1_AT	0.0411754
LES.2939.1.S1_AT	0.041239
LES.658.2.A1_AT	0.0413376
LES.2584.2.S1_A_AT	0.0414186
LES.3094.3.S1_AT	0.0414411
LES.3279.3.S1_AT	0.0415977
LES.2373.2.A1_AT	0.0416773
LES.5197.1.S1_AT	0.0416773
LES.4610.1.S1_AT	0.041752
LES.4376.1.S1_AT	0.0418325
LES.2920.2.S1_AT	0.0419244
LES.1234.1.A1_AT	0.0420845
LES.2480.1.A1_AT	0.0420845
LES.2852.1.S1_AT	0.0420845
LES.3209.2.A1_AT	0.0420845
LES.450.1.S1_AT	0.0420845
LES.5885.3.S1_AT	0.0420845
LESAFFX.58480.1.S1_AT	0.0420845
LES.743.1.S1_AT	0.0422801
LES.2921.1.S1_AT	0.0424798
LES.4590.1.S1_AT	0.0424798
LES.4680.1.S1_AT	0.0425462
LES.4963.1.S1_AT	0.0425462
LESAFFX.1959.2.S1_AT	0.0425736
LES.5838.1.S1_AT	0.042699
LES.4677.1.S1_AT	0.0427032
LES.2920.2.S1_A_AT	0.0427247
LES.5792.1.S1_AT	0.0428325
LESAFFX.51224.1.S1_AT	0.0428826
LES.3497.1.S1_AT	0.0429557
LES.3353.1.S1_AT	0.0430442
LES.4716.1.S1_AT	0.0430442
LES.4703.1.S1_AT	0.0430712
LES.468.2.S1_AT	0.043125
LESAFFX.1244.1.S1_AT	0.043125
LES.2605.1.A1_AT	0.0432302
LES.3385.2.S1_AT	0.0432302
LES.4780.1.S1_AT	0.0432513
LES.5594.1.S1_AT	0.0432895
LES.5466.1.S1_AT	0.0433619
LES.2404.1.S1_AT	0.0434114
LES.4090.1.S1_AT	0.0436151
LES.233.1.S1_AT	0.0436317
LES.3697.1.S1_AT	0.0436317
LESAFFX.35363.2.S1_AT	0.0436317
LESAFFX.63036.1.S1_AT	0.043641
LESAFFX.29104.1.S1_AT	0.0437472
LES.5255.1.S1_AT	0.0438418
LESAFFX.56517.1.S1_AT	0.043868
AFFX-LES-ACTIN-5_AT	0.0438741
LES.2822.3.S1_AT	0.0438741
LES.3183.2.S1_A_AT	0.0438741
LES.3303.1.S1_AT	0.0438741
LESAFFX.65213.2.S1_AT	0.0438741
LES.1801.1.S1_AT	0.0439116
LES.3273.1.S1_AT	0.0439943
LESAFFX.71370.1.S1_AT	0.0440147
LES.5625.1.S1_AT	0.0440464
LES.3159.2.S1_AT	0.0440847
LESAFFX.57299.1.S1_AT	0.0440847
LESAFFX.71661.1.S1_S_AT	0.0440847
LES.971.1.A1_AT	0.044201
LES.3369.3.S1_AT	0.0442212
LES.2032.1.A1_AT	0.0443034
LES.4371.1.A1_S_AT	0.0443831
LESAFFX.41477.2.S1_AT	0.0443831
LES.4248.2.S1_AT	0.0446059
LES.3967.1.S1_AT	0.0446599
LESAFFX.27262.1.S1_A_AT	0.0446599
LESAFFX.68578.1.S1_AT	0.0446599
LES.45.1.S1_AT	0.0447303
LESAFFX.25588.1.S1_S_AT	0.0447558
LES.2246.1.A1_AT	0.0448934
LES.4513.1.S1_AT	0.045014
LESAFFX.66714.1.S1_AT	0.0450897
LESAFFX.54921.1.S1_AT	0.0451204
LES.333.3.S1_AT	0.0451846
LES.5267.1.S1_AT	0.0451846
LES.5563.1.S1_AT	0.0451846
LESAFFX.71464.1.S1_AT	0.0452152
LESAFFX.46815.2.S1_AT	0.0452905
LES.3206.2.S1_A_AT	0.0453322
LES.1619.1.S1_AT	0.0456274
LES.4224.1.A1_AT	0.0456274
LES.2888.1.S1_AT	0.0456435
LES.862.1.S1_AT	0.0456435
LES.2712.3.A1_AT	0.0457016
LES.3570.1.S1_AT	0.0457453
LES.4960.1.S1_AT	0.0457453
LES.5804.1.S1_AT	0.045781
LES.1212.1.S1_AT	0.0458149
LES.2642.1.S1_AT	0.0458149
LES.3045.1.S1_AT	0.0458149
LES.4158.1.S1_AT	0.0458149
LES.5027.1.S1_AT	0.0458149
LES.5684.1.S1_AT	0.0458195
LESAFFX.56.2.A1_AT	0.0458195
LES.2759.1.S1_AT	0.0458485
LES.4035.1.S1_AT	0.0458485
LES.4330.1.S1_S_AT	0.0458485
LES.3228.1.S1_AT	0.0459337
LESAFFX.894.2.S1_AT	0.0459801
LES.3263.1.A1_AT	0.0465949
LES.389.1.A1_AT	0.0466189
LES.1858.1.S1_AT	0.0468578
LES.5715.1.S1_AT	0.0468595
LES.461.1.S1_AT	0.0469565
LES.4617.1.S1_AT	0.0469565
LES.3157.1.S1_AT	0.046967
LESAFFX.31904.2.S1_AT	0.046967
LESAFFX.70137.1.S1_AT	0.046967
LES.357.2.A1_AT	0.0469687
LES.5720.1.S1_AT	0.0470033
LES.2874.2.S1_A_AT	0.0470708
LESAFFX.39916.1.S1_AT	0.0470998
LES.4764.1.S1_AT	0.0473644
LES.2565.1.S1_AT	0.0474111
LES.510.2.S1_AT	0.0474111
LES.5007.1.S1_AT	0.047593
LES.4410.1.A1_AT	0.0476162
LES.5254.1.S1_AT	0.0476667
LESAFFX.70270.1.S1_AT	0.0478154
LES.969.1.A1_AT	0.0478505
LESAFFX.62609.1.S1_AT	0.0478505
LESAFFX.49103.1.A1_AT	0.0480153
LES.4414.1.A1_AT	0.0482071
LES.4006.1.S1_AT	0.0482734
LESAFFX.3590.1.A1_AT	0.0482798
LESAFFX.65883.1.S1_AT	0.0482862
LES.2581.1.S1_AT	0.0486685
LESAFFX.89.1.S1_AT	0.0486685
LES.320.1.S1_AT	0.0487561
LES.3088.2.S1_AT	0.0489957
LES.2034.1.S1_AT	0.0490347
LES.5776.1.S1_AT	0.0490347
LES.5233.1.S1_AT	0.0490786
LESAFFX.63298.1.S1_AT	0.0490899
LES.3170.1.A1_AT	0.0491775
LESAFFX.70085.2.S1_AT	0.0491775
LES.319.1.A1_AT	0.0491779
LES.2494.2.A1_AT	0.0492876
LES.2537.1.S1_AT	0.0492876
LES.4502.1.S1_AT	0.0492876
LES.5013.1.S1_AT	0.0492876
LES.3609.1.S1_AT	0.04952
LES.2151.1.A1_AT	0.0495849
LES.2540.3.S1_AT	0.0496067
LESAFFX.56.5.A1_A_AT	0.0496984
LES.5612.1.S1_AT	0.0498224
LES.379.1.S1_AT	0.0498817
LES.5817.1.S1_AT	0.0498817
LESAFFX.70817.1.S1_AT	0.0499731
LESAFFX.66436.1.S1_AT	0.0499731

## Sheet: S 4
Table S 4 - Biotic samples combined meta-analysis (by maxP)
ID	maxP
LES.1501.1.A1_AT	4.55e-18
LES.3828.1.S1_AT	4.55e-18
LES.4460.1.S1_AT	4.55e-18
LES.4924.1.S1_AT	4.55e-18
LESAFFX.8850.1.S1_AT	4.55e-18
LES.812.3.A1_AT	4.55e-18
LESAFFX.18587.1.S1_AT	4.55e-18
LES.1997.1.S1_AT	4.55e-18
LES.220.1.S1_AT	4.55e-18
LES.5229.1.S1_AT	4.55e-18
LES.5671.1.S1_AT	4.55e-18
LES.4933.1.S1_AT	0.000833333
LES.33.1.S1_AT	0.00133333
LES.3151.1.S1_AT	0.00133333
LES.3430.1.S1_AT	0.00133333
LES.3358.1.S1_AT	0.00136364
LES.3358.1.S1_A_AT	0.00136364
LES.3092.1.S1_AT	0.00136364
LES.4740.1.S1_AT	0.00136364
LESAFFX.71304.1.S1_AT	0.00136364
LESAFFX.63659.1.S1_AT	0.00136364
LES.2722.3.A1_AT	0.00136364
LES.293.1.S1_AT	0.00166667
LESAFFX.66096.2.S1_AT	0.00166667
LES.5656.1.S1_AT	0.00230769
LES.5029.1.S1_AT	0.00230769
LES.4783.1.S1_AT	0.00259259
LES.1020.2.A1_AT	0.00275862
LESAFFX.3606.1.S1_AT	0.00275862
LES.3311.1.S1_AT	0.003
LESAFFX.25313.1.S1_AT	0.0030303
LES.5126.1.S1_AT	0.0030303
LES.5322.1.S1_AT	0.0030303
LES.1532.3.S1_S_AT	0.00411765
LES.5344.1.S1_AT	0.00428571
LESAFFX.5912.1.A1_AT	0.00473684
LES.2747.1.S1_AT	0.00473684
LES.270.1.S1_AT	0.00473684
LESAFFX.71532.1.S1_AT	0.00512821
LESAFFX.42534.1.S1_AT	0.00534884
LES.2055.1.S1_AT	0.00534884
LES.4655.1.S1_AT	0.00534884
LES.4608.1.S1_AT	0.00534884
LESAFFX.13824.1.S1_AT	0.00568182
LESAFFX.10299.1.S1_AT	0.00577778
LESAFFX.56520.1.S1_AT	0.00673913
LESAFFX.9038.3.S1_AT	0.00698113
LES.797.1.S1_AT	0.00698113
LES.327.1.S1_AT	0.00698113
LES.542.1.A1_AT	0.00698113
LES.2637.1.S1_AT	0.00698113
LES.4731.1.S1_AT	0.00698113
LES.1829.1.S1_AT	0.00698113
LES.5930.1.S1_AT	0.00716667
LES.5014.1.S1_AT	0.00716667
LES.4025.1.S1_AT	0.00716667
LES.4756.1.S1_AT	0.00716667
LES.628.2.S1_AT	0.00716667
LES.4701.1.S1_AT	0.00716667
LESAFFX.12576.1.S1_AT	0.00716667
LES.275.1.S1_AT	0.00758064
LES.2899.1.S1_AT	0.00758064
LES.3358.2.S1_AT	0.00777778
LES.4442.1.S1_S_AT	0.00921875
LESAFFX.5719.1.S1_AT	0.00969231
LES.3652.1.S1_AT	0.00971831
LESAFFX.25974.1.S1_AT	0.00971831
LES.4140.1.S1_AT	0.00971831
LES.3287.1.S1_AT	0.00971831
LES.1684.1.A1_AT	0.00971831
LES.4526.1.S1_AT	0.00971831
LESAFFX.69647.1.S1_AT	0.0109722
LES.5890.1.S1_AT	0.0115068
LES.3280.1.A1_AT	0.0125676
LES.4007.1.S1_AT	0.0128
LES.122.1.S1_AT	0.0128947
LES.2688.1.S1_AT	0.0136364
LES.4542.1.S1_AT	0.0137179
LES.3090.1.S1_AT	0.0159756
LES.2325.1.S1_AT	0.0159756
LESAFFX.56634.1.S1_AT	0.0159756
LES.2562.1.S1_AT	0.0159756
LES.5934.1.S1_AT	0.0160714
LESAFFX.17663.2.A1_AT	0.0160714
LES.2842.2.A1_AT	0.0163529
LES.4437.2.S1_AT	0.0181395
LES.5771.1.S1_AT	0.0181609
LES.3566.1.S1_AT	0.0181818
LES.4067.1.S1_AT	0.0183146
LES.68.2.S1_A_AT	0.0184043
LESAFFX.9824.1.S1_AT	0.0184043
LESAFFX.63935.1.S1_AT	0.0184043
LESAFFX.26108.1.S1_AT	0.0184043
LES.2920.3.S1_AT	0.0184043
LES.3376.1.A1_AT	0.0190526
LES.677.1.S1_AT	0.019798
LES.2810.1.A1_AT	0.019798
LES.5044.1.S1_AT	0.019798
LESAFFX.49541.1.S1_AT	0.019798
LES.3460.1.S1_AT	0.0198
LESAFFX.3438.1.A1_AT	0.0206796
LESAFFX.1861.4.S1_AT	0.0206796
LES.5412.1.S1_AT	0.0206796
LESAFFX.32595.1.S1_AT	0.0209615
LES.4735.1.S1_AT	0.021619
LES.771.1.S1_AT	0.0227358
LES.2247.2.S1_AT	0.0232407
LES.4650.1.S1_AT	0.0232407
LES.2851.1.A1_AT	0.0238532
LES.3742.1.S1_AT	0.0248182
LES.4038.1.S1_AT	0.024955
LES.3180.3.A1_AT	0.0260177
LES.5000.1.S1_AT	0.0260177
LES.194.1.S1_AT	0.0262281
LES.2747.2.S1_AT	0.0275
LESAFFX.735.1.S1_AT	0.0275
LES.4429.1.S1_AT	0.0275
LES.3149.3.S1_AT	0.0275
LES.2540.3.S1_AT	0.0275
LES.1221.1.A1_AT	0.0275
LESAFFX.66335.1.S1_AT	0.02784
LES.4855.1.S1_AT	0.02784
LES.5662.1.S1_AT	0.02784
LES.2903.1.S1_AT	0.02784
LES.3083.1.A1_AT	0.02784
LES.2717.1.S1_AT	0.0301575
LES.5018.1.S1_AT	0.0301575
LES.4696.1.S1_AT	0.0315625
LESAFFX.10323.1.A1_AT	0.031938
AFFX-LES-GAPDH-5_AT	0.0325362
LES.369.1.S1_AT	0.0325362
LES.335.1.S1_AT	0.0325362
LES.5952.1.S1_AT	0.0325362
LES.364.1.S1_AT	0.0325362
LESAFFX.6338.1.S1_AT	0.0325362
LESAFFX.53966.1.S1_AT	0.0325362
LES.3082.1.S1_AT	0.0325362
LES.4544.1.S1_AT	0.0325362
LES.5056.1.S1_A_AT	0.0329496
LES.2909.2.S1_AT	0.0332857
LESAFFX.56301.1.S1_AT	0.0336879
LESAFFX.68271.1.S1_AT	0.0348592
LESAFFX.66478.1.S1_AT	0.0348966
LESAFFX.269.2.S1_AT	0.0348966
LESAFFX.68107.1.S1_AT	0.0348966
LES.2225.1.S1_AT	0.0349315
LESAFFX.46368.1.S1_AT	0.0365306
LES.5759.1.S1_AT	0.0376506
LES.1478.1.S1_AT	0.0376506
LES.5649.1.S1_AT	0.0376506
LES.5742.1.S1_AT	0.0376506
LES.2765.3.S1_AT	0.0376506
LES.61.1.S1_AT	0.0376506
LESAFFX.48738.1.S1_AT	0.0376506
LES.124.1.S1_AT	0.0376506
LES.3562.1.S1_AT	0.0376506
LES.1260.1.S1_AT	0.0376506
LES.934.1.S1_AT	0.0376506
LESAFFX.11993.1.S1_AT	0.0376506
LES.3268.2.A1_AT	0.0376506
LES.4708.1.S1_AT	0.0376506
LESAFFX.2226.2.A1_AT	0.0376506
LESAFFX.23154.1.S1_AT	0.0376506
LES.1399.1.A1_AT	0.0376506
LES.4688.1.S1_AT	0.0376506
LES.389.1.A1_AT	0.0376506
LES.322.1.S1_AT	0.0377647
LES.4920.1.S1_AT	0.0377647
LES.2416.1.S1_AT	0.0377647
LESAFFX.17339.1.S1_AT	0.0377647
LES.1254.1.A1_AT	0.0378363
LES.2285.1.A1_AT	0.0380347
LES.3195.1.S1_AT	0.0380347
LESAFFX.54921.1.S1_AT	0.0382184
LESAFFX.17707.1.S1_AT	0.0386932
LESAFFX.62189.1.S1_AT	0.0386932
LES.1221.2.S1_AT	0.0389888
LESAFFX.70371.1.S1_AT	0.0389888
LESAFFX.6075.1.S1_AT	0.0398883
LESAFFX.52595.1.S1_AT	0.0398925
LESAFFX.2597.1.S1_AT	0.0398925
LES.3457.1.S1_AT	0.0398925
LES.199.2.S1_AT	0.0398925
LES.4736.1.S1_AT	0.0398925
LESAFFX.1406.1.S1_S_AT	0.0398925
LESAFFX.71495.1.S1_AT	0.0398925
LESAFFX.51300.1.S1_AT	0.0402139
LES.1924.1.S1_AT	0.0414894
LES.3969.1.S1_AT	0.0419048
LES.5056.1.S1_X_AT	0.0425263
LES.2650.1.S1_AT	0.0435938
LES.5819.1.S1_AT	0.0435938
LES.217.1.S1_AT	0.0441753
LES.4995.1.S1_AT	0.0441753
LES.1037.1.A1_AT	0.0442857
LES.5514.1.S1_AT	0.0442857
LES.4921.1.S1_AT	0.0444444
LESAFFX.42421.1.S1_AT	0.0444444
LES.283.1.S1_AT	0.0450754
LESAFFX.58308.1.S1_AT	0.04545
LESAFFX.18906.1.S1_AT	0.0470149
LESAFFX.65240.1.S1_AT	0.0470192
LES.3087.2.S1_AT	0.0470192
LES.2568.3.A1_AT	0.0470192
LES.4643.1.S1_AT	0.0470192
LES.1113.1.A1_AT	0.0470192
LES.5684.1.S1_AT	0.0470192
LES.598.1.A1_AT	0.0470192
LES.3344.1.A1_AT	0.0471905
LES.2057.1.S1_AT	0.0471905
LES.2512.2.S1_AT	0.0492958
LES.4495.1.S1_AT	0.0492958
LES.5454.1.S1_AT	0.0492958
LESAFFX.65352.2.S1_AT	0.0495833
LESAFFX.28368.1.S1_AT	0.0495833
LES.5778.1.S1_AT	0.0495833
LES.5537.1.S1_AT	0.0497273
LES.5465.1.S1_AT	0.0497273
LES.333.2.S1_AT	0.0497273
LES.393.1.S1_AT	0.0497273

## Sheet: S 5
Table S 5- ID of 361 DEG common in "Biotic" and "Abiotc".
ID
LES.157.1.S1_AT
LES.1606.1.S1_AT
LES.2989.1.S1_AT
LES.3168.1.S1_AT
LES.3358.1.S1_AT
LES.3510.1.S1_AT
LES.3725.1.S1_AT
LES.3774.1.S1_AT
LES.3991.1.S1_AT
LES.4442.1.S1_S_AT
LES.5579.1.S1_AT
LES.56.1.S1_AT
LES.68.2.S1_A_AT
LES.2747.2.S1_AT
LES.275.1.S1_AT
LES.3358.1.S1_A_AT
LES.812.3.A1_AT
LES.1020.2.A1_AT
LES.3311.3.S1_AT
LES.3358.2.S1_AT
LES.3311.2.S1_AT
LES.5755.1.S1_AT
LES.5930.1.S1_AT
LES.3311.1.S1_AT
LES.4923.1.S1_AT
AFFX-LES-GAPDH-5_AT
LES.5208.1.S1_AT
LES.122.1.S1_AT
LES.3666.1.S1_AT
LES.119.1.S1_AT
LES.3092.1.S1_AT
LES.327.1.S1_AT
LES.5014.1.S1_AT
LES.231.1.S1_AT
LES.1724.3.A1_AT
LES.1859.2.S1_AT
LES.5090.1.S1_AT
AFFX-LES-GAPDH-M_AT
LES.5025.1.S1_AT
LES.1.1.S1_AT
LES.3632.1.S1_AT
LES.5341.1.S1_AT
LES.4007.1.S1_AT
LES.842.2.S1_A_AT
LES.1724.1.S1_AT
LES.3687.1.S1_AT
LES.4740.1.S1_AT
LES.1020.1.A1_A_AT
LES.2490.1.S1_AT
LES.2325.1.S1_AT
LES.4490.1.S1_AT
LES.4655.1.S1_AT
LES.1478.1.S1_AT
LES.1972.1.S1_AT
LES.3557.1.S1_AT
LES.3418.1.S1_AT
LES.5696.1.S1_AT
LES.2858.1.S1_AT
LES.5318.1.S1_AT
LES.3225.3.S1_AT
LES.3225.1.A1_AT
LES.4519.3.S1_AT
LES.4756.1.S1_AT
LES.507.2.A1_AT
LES.4573.1.S1_AT
LES.3180.3.A1_AT
LES.4834.1.S1_AT
LES.4979.1.S1_AT
LES.3555.1.S1_AT
LES.1793.1.A1_AT
LES.1288.1.S1_AT
LES.2717.2.A1_AT
LES.4735.1.S1_AT
LES.5156.1.S1_AT
LES.3225.2.S1_AT
LES.4542.1.S1_AT
LES.3457.1.S1_AT
LES.2860.1.S1_AT
LES.1310.1.S1_AT
LES.3525.1.S1_AT
LES.4695.1.S1_AT
LES.5952.1.S1_AT
LES.85.1.S1_AT
LES.311.1.S1_AT
LES.5650.1.S1_AT
LES.4819.1.S1_AT
LES.2014.1.A1_AT
LES.3418.2.S1_A_AT
LES.4709.1.S1_AT
LES.5017.1.A1_AT
LES.262.1.S1_AT
LES.3573.1.S1_AT
LES.3052.3.A1_AT
LES.3038.2.A1_AT
LES.1781.1.S1_AT
LES.2578.1.S1_AT
LES.3672.1.S1_AT
LES.3777.1.S1_AT
LES.3011.1.S1_AT
LES.3762.1.S1_AT
LES.5835.1.S1_AT
LES.2130.1.A1_AT
LES.1064.1.S1_AT
LES.4060.1.S1_AT
LES.4539.2.S1_AT
LES.364.1.S1_AT
LES.1250.2.S1_AT
LES.194.1.S1_AT
LES.5311.1.S1_AT
LES.4660.1.S1_AT
LES.127.1.S1_AT
LES.3214.1.S1_AT
LES.1493.1.S1_AT
LES.3815.1.S1_AT
LES.1221.2.S1_AT
LES.4263.1.S1_AT
LES.4710.1.S1_AT
LES.514.1.S1_AT
LES.771.1.S1_AT
AFFX-LES-GAPDH-3_AT
LES.2123.1.A1_AT
LES.4483.1.S1_AT
LES.4855.1.S1_AT
LES.5960.1.S1_AT
LES.3038.1.S1_AT
LES.2247.1.A1_AT
LES.1532.3.S1_S_AT
LES.2560.1.S1_AT
LES.4986.1.S1_AT
LES.1091.1.A1_AT
LES.4731.1.S1_AT
LES.1203.1.A1_AT
LES.2650.1.S1_AT
LES.2855.1.S1_AT
LES.444.1.S1_AT
LES.2169.2.S1_AT
LES.3260.1.S1_AT
LES.4769.1.S1_AT
LES.1049.1.S1_AT
LES.2980.1.S1_AT
LES.3267.3.A1_AT
LES.4316.1.S1_AT
LES.4476.1.S1_AT
LES.4635.1.S1_AT
LES.2360.1.S1_AT
LES.3595.1.S1_AT
LES.4696.1.S1_AT
LES.4036.1.S1_AT
LES.2924.1.S1_AT
LES.2182.1.A1_AT
LES.3463.1.S1_AT
LES.4807.1.S1_AT
LES.173.1.S1_AT
LES.3562.1.S1_AT
LES.4344.1.S1_AT
LES.5008.1.S1_AT
LES.3317.1.S1_AT
LES.4469.1.A1_AT
LES.3530.1.S1_AT
LES.392.1.S1_AT
LES.3279.1.A1_AT
LES.1393.1.S1_AT
LES.3470.1.S1_AT
LES.314.1.A1_AT
LES.3590.1.S1_AT
LES.2281.1.S1_AT
LES.1393.2.A1_AT
LES.4360.1.S1_AT
LES.3334.1.S1_AT
LES.5244.1.S1_AT
LES.1250.3.A1_AT
LES.414.1.S1_AT
LES.209.1.S1_AT
LES.292.1.S1_AT
LES.4651.1.S1_AT
LES.827.1.S1_AT
LES.2335.1.A1_AT
LES.3546.1.S1_AT
LES.2986.1.S1_AT
LES.3126.1.S1_AT
LES.5131.1.S1_AT
LES.1691.1.S1_AT
LES.1235.1.A1_AT
LES.2271.1.S1_AT
LES.5787.1.S1_AT
LES.5786.1.S1_AT
LES.5948.1.S1_AT
LES.4539.1.S1_A_AT
LES.32.1.S1_AT
LES.1699.1.A1_AT
LES.2409.1.S1_AT
LES.2286.1.S1_AT
LES.2608.1.S1_AT
LES.428.1.S1_AT
LES.4767.1.S1_AT
LES.2949.1.S1_AT
LES.4539.1.S1_AT
LES.5098.1.S1_AT
LES.5540.1.S1_AT
LES.3574.1.S1_AT
LES.3337.2.S1_AT
LES.4704.1.S1_AT
LES.5539.1.S1_AT
LES.3467.1.S1_AT
LES.4139.1.S1_AT
LES.611.2.A1_AT
LES.2229.1.S1_AT
LES.934.1.S1_AT
LES.3545.1.S1_AT
LES.1081.1.S1_AT
LES.3136.1.S1_AT
LES.248.1.S1_A_AT
LES.4848.1.S1_AT
LES.4747.1.S1_AT
LES.3060.1.S1_AT
LES.5400.1.S1_AT
LES.4553.1.S1_AT
LES.2768.1.S1_AT
LES.5854.1.S1_AT
LES.2957.1.A1_AT
LES.3018.1.S1_AT
LES.2189.1.S1_AT
LES.4628.1.S1_AT
LES.1603.1.A1_AT
LES.5157.1.S1_AT
LES.3755.1.A1_AT
LES.4301.1.S1_AT
LES.2667.1.S1_AT
LES.3416.1.S1_AT
LES.283.1.S1_AT
LES.4519.2.S1_AT
LES.5015.1.S1_AT
LES.4526.1.S1_AT
LES.2767.1.S1_AT
LES.3366.2.S1_A_AT
LES.2476.1.S1_AT
LES.2496.2.S1_AT
LES.418.1.S1_AT
LES.321.1.S1_AT
LES.3202.1.S1_AT
LES.3380.1.S1_AT
LES.4523.1.S1_AT
LES.266.1.S1_AT
LES.2884.1.S1_AT
LES.5217.1.S1_AT
LES.5610.1.S1_AT
LES.3185.2.S1_AT
LES.4824.1.S1_AT
LES.1924.1.S1_AT
LES.4671.1.S1_AT
LES.3624.1.S1_AT
LES.2012.1.S1_AT
LES.2592.1.S1_AT
LES.3306.1.S1_AT
LES.4594.1.S1_AT
LES.4564.1.S1_AT
LES.3569.1.S1_AT
LES.5465.1.S1_AT
LES.4847.1.S1_AT
LES.2298.2.A1_A_AT
LES.5942.1.S1_AT
LES.1450.1.S1_AT
LES.1434.2.A1_AT
LES.1437.1.A1_AT
LES.4554.1.S1_AT
LES.3540.1.S1_AT
LES.1129.1.S1_AT
LES.1401.1.S1_AT
LES.4535.1.S1_AT
LES.4792.1.S1_AT
LES.3030.1.A1_AT
LES.4773.1.S1_AT
LES.4849.1.S1_AT
LES.5628.1.S1_AT
LES.2733.1.S1_AT
LES.3969.1.S1_AT
LES.5260.1.S1_AT
LES.1181.1.A1_AT
LES.3456.1.S1_AT
LES.1399.1.A1_AT
LES.53.1.S1_AT
LES.5476.1.S1_AT
LES.1781.1.S1_A_AT
LES.5584.1.S1_AT
LES.2880.2.S1_AT
LES.5296.1.S1_AT
LES.4893.1.S1_AT
LES.266.1.S1_A_AT
LES.2813.2.A1_AT
LES.4688.1.S1_AT
LES.3170.2.S1_AT
LES.243.1.S1_AT
LES.2681.1.A1_AT
LES.135.1.S1_AT
LES.2652.1.S1_AT
LES.5522.1.S1_AT
LES.4760.1.S1_AT
LES.2297.1.S1_AT
LES.2618.1.S1_AT
LES.4650.1.S1_AT
LES.3471.1.S1_AT
LES.252.1.S1_AT
LES.4082.1.S1_AT
LES.886.1.A1_AT
LES.4794.1.S1_AT
LES.4599.1.S1_AT
LES.5228.1.A1_AT
LES.2667.2.S1_AT
LES.3279.2.S1_AT
LES.2954.2.A1_AT
LES.5558.1.S1_AT
LES.3401.2.S1_AT
LES.3337.3.S1_AT
LES.5011.1.S1_AT
LES.2329.1.A1_AT
LES.2494.1.S1_AT
LES.5218.1.S1_AT
LES.734.1.S1_AT
LES.161.1.S1_AT
LES.3167.1.S1_AT
LES.112.1.S1_AT
LES.2177.1.A1_AT
LES.222.2.A1_AT
LES.5830.1.S1_AT
LES.3390.1.S1_AT
LES.658.2.A1_AT
LES.3094.3.S1_AT
LES.4610.1.S1_AT
LES.4376.1.S1_AT
LES.2920.2.S1_AT
LES.2480.1.A1_AT
LES.4590.1.S1_AT
LES.4680.1.S1_AT
LES.5838.1.S1_AT
LES.2920.2.S1_A_AT
LES.4716.1.S1_AT
LES.3385.2.S1_AT
LES.5466.1.S1_AT
LES.233.1.S1_AT
LES.3697.1.S1_AT
LES.2822.3.S1_AT
LES.5625.1.S1_AT
LES.3967.1.S1_AT
LES.45.1.S1_AT
LES.2246.1.A1_AT
LES.4224.1.A1_AT
LES.5804.1.S1_AT
LES.1212.1.S1_AT
LES.3045.1.S1_AT
LES.5027.1.S1_AT
LES.1858.1.S1_AT
LES.461.1.S1_AT
LES.4617.1.S1_AT
LES.3157.1.S1_AT
LES.5007.1.S1_AT
LES.969.1.A1_AT
LES.2581.1.S1_AT
LES.3170.1.A1_AT
LES.2494.2.A1_AT
LES.4502.1.S1_AT
LES.2151.1.A1_AT
response to stimulus
Name
Les.321.1.S1_at
Les.45.1.S1_at
Les.4923.1.S1_at
Les.248.1.S1_a_at
Les.827.1.S1_at
Les.2822.3.S1_at
Les.4316.1.S1_at
Les.3666.1.S1_at
Les.5015.1.S1_at
Les.4344.1.S1_at
Les.161.1.S1_at
Les.3126.1.S1_at
Les.4695.1.S1_at
Les.1724.1.S1_at
Les.4036.1.S1_at
Les.2560.1.S1_at
Les.3573.1.S1_at

## Sheet: S 6
Table S 6 - Frequency of significant GO terms of DEGs shared by both AS and BS.
GO term	Ontology	Description	Number in input list	Number in BG/Ref	p-value	FDR
GO:0008152	P	metabolic process	80	880	2.4e-54	2e-51
GO:0009987	P	cellular process	80	925	9.5e-53	4e-50
GO:0044238	P	primary metabolic process	73	706	2.3e-51	6.4e-49
GO:0044237	P	cellular metabolic process	66	655	2.9e-44	6.1e-42
GO:0050896	P	response to stimulus	53	376	1.2e-40	2e-38
GO:0006950	P	response to stress	37	159	2.5e-34	3.6e-32
GO:0005488	F	binding	69	1186	4.2e-32	7.9e-30
GO:0065007	P	biological regulation	39	227	8e-32	9.6e-30
GO:0009058	P	biosynthetic process	42	318	2.9e-30	3e-28
GO:0044249	P	cellular biosynthetic process	41	296	3.2e-30	3e-28
GO:0042221	P	response to chemical stimulus	35	198	9.3e-29	7.9e-27
GO:0003824	F	catalytic activity	66	1235	4.9e-28	4.5e-26
GO:0043170	P	macromolecule metabolic process	44	434	2.1e-27	1.6e-25
GO:0009628	P	response to abiotic stimulus	25	72	1.2e-26	8.7e-25
GO:0050789	P	regulation of biological process	33	198	2.6e-26	1.7e-24
GO:0044464	C	cell part	79	2143	2.9e-25	2.1e-23
GO:0005623	C	cell	79	2143	2.9e-25	2.1e-23
GO:0050794	P	regulation of cellular process	31	180	4.7e-25	2.8e-23
GO:0051704	P	multi-organism process	19	31	4.8e-24	2.7e-22
GO:0051707	P	response to other organism	18	26	1.6e-23	8.4e-22
GO:0009607	P	response to biotic stimulus	18	28	4.3e-23	2.1e-21
GO:0007242	P	intracellular signaling cascade	18	30	1.1e-22	5.1e-21
GO:0009266	P	response to temperature stimulus	16	17	1.7e-22	7.5e-21
GO:0007165	P	signal transduction	19	42	4.2e-22	1.8e-20
GO:0012505	C	endomembrane system	18	34	6.1e-22	2.9e-20
GO:0051716	P	cellular response to stimulus	16	22	3e-21	1.2e-19
GO:0044260	P	cellular macromolecule metabolic process	35	350	3.2e-21	1.2e-19
GO:0010033	P	response to organic substance	23	102	6.9e-21	2.5e-19
GO:0006807	P	nitrogen compound metabolic process	31	264	1.4e-20	5e-19
GO:0005975	P	carbohydrate metabolic process	20	66	2.1e-20	7.2e-19
GO:0016491	F	oxidoreductase activity	26	163	3.2e-20	1.1e-18
GO:0030554	F	adenyl nucleotide binding	16	27	3.4e-20	1.1e-18
GO:0001883	F	purine nucleoside binding	16	27	3.4e-20	1.1e-18
GO:0001882	F	nucleoside binding	16	27	3.4e-20	1.1e-18
GO:0043436	P	oxoacid metabolic process	24	132	7.4e-20	2.2e-18
GO:0006082	P	organic acid metabolic process	24	132	7.4e-20	2.2e-18
GO:0019752	P	carboxylic acid metabolic process	24	132	7.4e-20	2.2e-18
GO:0042180	P	cellular ketone metabolic process	24	134	1e-19	2.9e-18
GO:0032559	F	adenyl ribonucleotide binding	13	13	1.1e-18	3e-17
GO:0000166	F	nucleotide binding	19	74	2.9e-18	6.8e-17
GO:0017076	F	purine nucleotide binding	16	41	6.5e-18	1.3e-16
GO:0032502	P	developmental process	22	145	9.6e-17	2.7e-15
GO:0044424	C	intracellular part	60	1619	1e-16	3.7e-15
GO:0005622	C	intracellular	60	1626	1.3e-16	3.7e-15
GO:0032501	P	multicellular organismal process	19	99	3.2e-16	8.9e-15
GO:0005737	C	cytoplasm	51	1183	3.3e-16	8e-15
GO:0044262	P	cellular carbohydrate metabolic process	12	17	4.7e-16	1.2e-14
GO:0006629	P	lipid metabolic process	20	119	4.8e-16	1.2e-14
GO:0032555	F	purine ribonucleotide binding	13	27	1.1e-15	1.9e-14
GO:0032553	F	ribonucleotide binding	13	27	1.1e-15	1.9e-14
GO:0043231	C	intracellular membrane-bounded organelle	46	996	1.9e-15	3.5e-14
GO:0043227	C	membrane-bounded organelle	46	996	1.9e-15	3.5e-14
GO:0006979	P	response to oxidative stress	12	20	2e-15	4.9e-14
GO:0009056	P	catabolic process	20	133	3.3e-15	7.9e-14
GO:0009755	P	hormone-mediated signaling pathway	10	10	1.3e-14	3e-13
GO:0016052	P	carbohydrate catabolic process	10	10	1.3e-14	3e-13
GO:0032870	P	cellular response to hormone stimulus	10	10	1.3e-14	3e-13
GO:0004553	F	hydrolase activity, hydrolyzing O-glycosyl compounds	10	10	1.3e-14	2.1e-13
GO:0016798	F	hydrolase activity, acting on glycosyl bonds	10	11	2.5e-14	3.7e-13
GO:0043229	C	intracellular organelle	47	1136	4.9e-14	7.1e-13
GO:0043226	C	organelle	47	1136	4.9e-14	7.1e-13
GO:0007275	P	multicellular organismal development	17	98	5.9e-14	1.3e-12
GO:0019222	P	regulation of metabolic process	17	104	1.4e-13	3e-12
GO:0000003	P	reproduction	13	44	1.9e-13	3.9e-12
GO:0044255	P	cellular lipid metabolic process	16	89	2.1e-13	4.3e-12
GO:0065008	P	regulation of biological quality	14	58	2.3e-13	4.5e-12
GO:0009719	P	response to endogenous stimulus	15	77	4.6e-13	8.8e-12
GO:0005515	F	protein binding	19	161	9.1e-13	1.2e-11
GO:0048856	P	anatomical structure development	16	100	1.1e-12	2e-11
GO:0006519	P	cellular amino acid and derivative metabolic process	14	72	3e-12	5.5e-11
GO:0022414	P	reproductive process	12	44	3.8e-12	6.8e-11
GO:0060255	P	regulation of macromolecule metabolic process	15	97	8.9e-12	1.6e-10
GO:0008610	P	lipid biosynthetic process	14	79	9e-12	1.6e-10
GO:0034641	P	cellular nitrogen compound metabolic process	13	63	9.7e-12	1.6e-10
GO:0031323	P	regulation of cellular metabolic process	15	99	1.2e-11	1.9e-10
GO:0006955	P	immune response	9	16	1.2e-11	1.9e-10
GO:0032787	P	monocarboxylic acid metabolic process	13	66	1.6e-11	2.6e-10
GO:0002376	P	immune system process	9	17	1.8e-11	2.8e-10
GO:0009605	P	response to external stimulus	8	10	2.3e-11	3.5e-10
GO:0009743	P	response to carbohydrate stimulus	9	18	2.7e-11	4e-10
GO:0019748	P	secondary metabolic process	10	29	3.8e-11	5.6e-10
GO:0009308	P	amine metabolic process	12	56	4.4e-11	6.4e-10
GO:0080090	P	regulation of primary metabolic process	14	93	6.4e-11	9e-10
GO:0006720	P	isoprenoid metabolic process	8	12	6.4e-11	9e-10
GO:0044248	P	cellular catabolic process	12	60	8.8e-11	1.2e-09
GO:0009725	P	response to hormone stimulus	13	77	9e-11	1.2e-09
GO:0034645	P	cellular macromolecule biosynthetic process	15	118	1.1e-10	1.5e-09
GO:0009059	P	macromolecule biosynthetic process	15	118	1.1e-10	1.5e-09
GO:0044444	C	cytoplasmic part	37	902	1.2e-10	1.5e-09
GO:0010467	P	gene expression	15	124	2.1e-10	2.7e-09
GO:0045087	P	innate immune response	8	15	2.4e-10	3.1e-09
GO:0016053	P	organic acid biosynthetic process	13	88	4e-10	5e-09
GO:0046394	P	carboxylic acid biosynthetic process	13	88	4e-10	5e-09
GO:0010556	P	regulation of macromolecule biosynthetic process	13	89	4.5e-10	5.5e-09
GO:0009889	P	regulation of biosynthetic process	13	90	5.1e-10	5.9e-09
GO:0031326	P	regulation of cellular biosynthetic process	13	90	5.1e-10	5.9e-09
GO:0019219	P	regulation of nucleobase, nucleoside, nucleotide and nucleic acid metabolic process	13	90	5.1e-10	5.9e-09
GO:0051171	P	regulation of nitrogen compound metabolic process	13	90	5.1e-10	5.9e-09
GO:0009314	P	response to radiation	9	28	6.4e-10	7.2e-09
GO:0009416	P	response to light stimulus	9	28	6.4e-10	7.2e-09
GO:0010035	P	response to inorganic substance	11	57	7.9e-10	8.8e-09
GO:0016265	P	death	7	10	8.4e-10	9.1e-09
GO:0008219	P	cell death	7	10	8.4e-10	9.1e-09
GO:0010468	P	regulation of gene expression	13	95	9.4e-10	1e-08
GO:0048513	P	organ development	9	31	1.4e-09	1.4e-08
GO:0005739	C	mitochondrion	11	62	1.7e-09	2.1e-08
GO:0006725	P	cellular aromatic compound metabolic process	10	47	2.1e-09	2.2e-08
GO:0048731	P	system development	9	33	2.2e-09	2.2e-08
GO:0006066	P	alcohol metabolic process	9	34	2.7e-09	2.8e-08
GO:0009057	P	macromolecule catabolic process	13	105	2.8e-09	2.9e-08
GO:0009611	P	response to wounding	6	6	3.4e-09	3.4e-08
GO:0045449	P	regulation of transcription	12	88	4.5e-09	4.4e-08
GO:0006970	P	response to osmotic stress	7	14	4.8e-09	4.7e-08
GO:0044106	P	cellular amine metabolic process	10	52	5e-09	4.8e-08
GO:0006520	P	cellular amino acid metabolic process	10	52	5e-09	4.8e-08
GO:0003006	P	reproductive developmental process	9	37	5.1e-09	4.8e-08
GO:0009814	P	defense response, incompatible interaction	6	7	6.3e-09	5.9e-08
GO:0006350	P	transcription	12	94	8.8e-09	8.1e-08
GO:0009505	C	plant-type cell wall	6	8	1.1e-08	1.2e-07
GO:0006952	P	defense response	10	59	1.5e-08	1.3e-07
GO:0016740	F	transferase activity	23	441	1.5e-08	1.9e-07
GO:0051179	P	localization	16	205	1.8e-08	1.6e-07
GO:0006721	P	terpenoid metabolic process	6	9	1.8e-08	1.6e-07
GO:0019538	P	protein metabolic process	18	272	2.4e-08	2.1e-07
GO:0048037	F	cofactor binding	10	63	2.6e-08	3e-07
GO:0006139	P	nucleobase, nucleoside, nucleotide and nucleic acid metabolic process	15	188	4e-08	3.5e-07
GO:0009408	P	response to heat	6	11	4.4e-08	3.8e-07
GO:0051186	P	cofactor metabolic process	8	34	4.8e-08	4.1e-07
GO:0008299	P	isoprenoid biosynthetic process	6	12	6.5e-08	5.5e-07
GO:0044271	P	cellular nitrogen compound biosynthetic process	9	52	6.9e-08	5.7e-07
GO:0006810	P	transport	15	201	9.2e-08	7.5e-07
GO:0051234	P	establishment of localization	15	201	9.2e-08	7.5e-07
GO:0043167	F	ion binding	21	411	9.9e-08	1.1e-06
GO:0009751	P	response to salicylic acid stimulus	5	6	1.4e-07	1.1e-06
GO:0005634	C	nucleus	17	275	1.5e-07	1.6e-06
GO:0009791	P	post-embryonic development	7	27	1.9e-07	1.6e-06
GO:0016020	C	membrane	25	602	2.3e-07	2.2e-06
GO:0008654	P	phospholipid biosynthetic process	5	7	2.4e-07	1.9e-06
GO:0016787	F	hydrolase activity	18	322	2.7e-07	2.8e-06
GO:0006796	P	phosphate metabolic process	11	109	3.4e-07	2.7e-06
GO:0006793	P	phosphorus metabolic process	11	109	3.4e-07	2.7e-06
GO:0019637	P	organophosphate metabolic process	5	8	3.8e-07	2.9e-06
GO:0006644	P	phospholipid metabolic process	5	8	3.8e-07	2.9e-06
GO:0008202	P	steroid metabolic process	5	8	3.8e-07	2.9e-06
GO:0044267	P	cellular protein metabolic process	14	195	4e-07	3e-06
GO:0019438	P	aromatic compound biosynthetic process	7	31	4.4e-07	3.3e-06
GO:0060089	F	molecular transducer activity	6	18	4.4e-07	4.1e-06
GO:0004871	F	signal transducer activity	6	18	4.4e-07	4.1e-06
GO:0048869	P	cellular developmental process	7	32	5.3e-07	3.9e-06
GO:0009888	P	tissue development	5	9	5.9e-07	4.3e-06
GO:0009415	P	response to water	5	9	5.9e-07	4.3e-06
GO:0003677	F	DNA binding	15	236	6.5e-07	5.8e-06
GO:0016310	P	phosphorylation	10	94	7.8e-07	5.6e-06
GO:0012501	P	programmed cell death	5	10	8.8e-07	6.2e-06
GO:0006084	P	acetyl-CoA metabolic process	5	10	8.8e-07	6.2e-06
GO:0016903	F	oxidoreductase activity, acting on the aldehyde or oxo group of donors	6	21	9.4e-07	8e-06
GO:0008361	P	regulation of cell size	6	22	1.2e-06	8.1e-06
GO:0032535	P	regulation of cellular component size	6	22	1.2e-06	8.1e-06
GO:0090066	P	regulation of anatomical structure size	6	22	1.2e-06	8.1e-06
GO:0006732	P	coenzyme metabolic process	6	22	1.2e-06	8.1e-06
GO:0040007	P	growth	6	22	1.2e-06	8.1e-06
GO:0048608	P	reproductive structure development	7	37	1.2e-06	8.4e-06
GO:0009507	C	chloroplast	18	367	1.7e-06	1.5e-05
GO:0009651	P	response to salt stress	5	12	1.8e-06	1.2e-05
GO:0043169	F	cation binding	19	411	1.9e-06	1.5e-05
GO:0043687	P	post-translational protein modification	10	105	2e-06	1.3e-05
GO:0006468	P	protein amino acid phosphorylation	9	81	2.1e-06	1.4e-05
GO:0042440	P	pigment metabolic process	6	26	2.7e-06	1.8e-05
GO:0006575	P	cellular amino acid derivative metabolic process	6	26	2.7e-06	1.8e-05
GO:0009536	C	plastid	18	392	4e-06	3.1e-05
GO:0044422	C	organelle part	19	434	4.1e-06	3.1e-05
GO:0044446	C	intracellular organelle part	19	434	4.1e-06	3.1e-05
GO:0016043	P	cellular component organization	9	91	5e-06	3.2e-05
GO:0016830	F	carbon-carbon lyase activity	5	16	5.6e-06	4.3e-05
GO:0031090	C	organelle membrane	12	179	5.6e-06	4.1e-05
GO:0005576	C	extracellular region	7	48	5.9e-06	4.1e-05
GO:0006464	P	protein modification process	10	120	6e-06	3.8e-05
GO:0009309	P	amine biosynthetic process	6	31	6.7e-06	4.2e-05
GO:0048518	P	positive regulation of biological process	5	17	7.1e-06	4.5e-05
GO:0046872	F	metal ion binding	17	368	7.2e-06	5.4e-05
GO:0043412	P	macromolecule modification	10	127	9.6e-06	6e-05
GO:0016301	F	kinase activity	11	158	1e-05	7.3e-05
GO:0006996	P	organelle organization	6	34	1.1e-05	6.6e-05
GO:0016021	C	integral to membrane	11	166	1.6e-05	0.0001
GO:0006091	P	generation of precursor metabolites and energy	5	21	1.7e-05	0.0001
GO:0016049	P	cell growth	5	21	1.7e-05	0.0001
GO:0006355	P	regulation of transcription, DNA-dependent	7	58	1.8e-05	0.00011
GO:0051252	P	regulation of RNA metabolic process	7	58	1.8e-05	0.00011
GO:0016829	F	lyase activity	7	59	2e-05	0.00014
GO:0042398	P	cellular amino acid derivative biosynthetic process	5	22	2.1e-05	0.00012
GO:0006351	P	transcription, DNA-dependent	7	60	2.2e-05	0.00013
GO:0032774	P	RNA biosynthetic process	7	60	2.2e-05	0.00013
GO:0046148	P	pigment biosynthetic process	5	23	2.5e-05	0.00015
GO:0050662	F	coenzyme binding	7	61	2.5e-05	0.00016
GO:0005509	F	calcium ion binding	5	24	3e-05	0.00019
GO:0004672	F	protein kinase activity	9	119	3.7e-05	0.00023
GO:0003676	F	nucleic acid binding	16	377	3.8e-05	0.00023
GO:0016773	F	phosphotransferase activity, alcohol group as acceptor	10	151	3.9e-05	0.00023
GO:0031224	C	intrinsic to membrane	11	185	4.1e-05	0.00026
GO:0022892	F	substrate-specific transporter activity	8	93	4.4e-05	0.00025
GO:0030528	F	transcription regulator activity	11	191	5.4e-05	0.00029
GO:0008652	P	cellular amino acid biosynthetic process	5	28	5.8e-05	0.00034
GO:0016070	P	RNA metabolic process	7	79	0.00011	0.00065
GO:0009653	P	anatomical structure morphogenesis	5	33	0.00012	0.00066
GO:0042592	P	homeostatic process	5	33	0.00012	0.00066
GO:0044425	C	membrane part	12	252	0.00014	0.00084
GO:0003700	F	transcription factor activity	10	181	0.00016	0.00087
GO:0016772	F	transferase activity, transferring phosphorus-containing groups	11	219	0.00017	0.00087
GO:0005215	F	transporter activity	9	147	0.00017	0.00087
GO:0006631	P	fatty acid metabolic process	6	59	0.00018	0.001
GO:0005886	C	plasma membrane	8	116	0.00019	0.0011
GO:0044265	P	cellular macromolecule catabolic process	5	38	0.00021	0.0012
GO:0005783	C	endoplasmic reticulum	5	39	0.00024	0.0013
GO:0005618	C	cell wall	7	90	0.00024	0.0013
GO:0005506	F	iron ion binding	7	91	0.00026	0.0013
GO:0030312	C	external encapsulating structure	7	92	0.00027	0.0014
GO:0005829	C	cytosol	8	126	0.00032	0.0016
GO:0022891	F	substrate-specific transmembrane transporter activity	6	67	0.00034	0.0016
GO:0022857	F	transmembrane transporter activity	6	82	0.00091	0.0043
GO:0046483	P	heterocycle metabolic process	5	64	0.0019	0.011
GO:0004674	F	protein serine/threonine kinase activity	6	119	0.0054	0.025
GO:0046914	F	transition metal ion binding	10	305	0.0072	0.032
GO:0016788	F	hydrolase activity, acting on ester bonds	5	97	0.01	0.044

## Sheet: S 7
Table S 7 -the DEGs shared by both AS and BS represented various classes of proteins and are participated in many different processes from network analysis
#pathway ID	pathway description	observed gene count	false discovery rate	matching proteins in your network (IDs)	matching proteins in your network (labels)
GO.0044238	primary metabolic process	20	6.88e-12	Solyc01g091190.2.1,Solyc01g096480.2.1,Solyc01g099630.2.1,Solyc02g082920.2.1,Solyc02g083590.2.1,Solyc02g090890.2.1,Solyc04g049350.2.1,Solyc04g051860.2.1,Solyc04g081320.2.1,Solyc04g082030.1.1,Solyc05g055230.1.1,Solyc06g073190.2.1,Solyc06g082590.1.1,Solyc06g082600.2.1,Solyc06g083790.2.1,Solyc07g007870.2.1,Solyc07g047850.2.1,Solyc07g052480.2.1,Solyc09g010180.2.1,Solyc12g098350.1.1	CAB4,CHI3,CS1,FRK2,LOC543657,LOC543863,LOC544043,LOC544078,LOC544273,LOC544276,ODC,RPS17,Solyc01g091190.2.1,Solyc04g081320.2.1,UBC3,XTH1,ZE,infA,opr3,spy
GO.0009987	cellular process	21	9.2e-12	Solyc01g091190.2.1,Solyc01g099630.2.1,Solyc02g082920.2.1,Solyc02g090890.2.1,Solyc04g049350.2.1,Solyc04g051860.2.1,Solyc04g081320.2.1,Solyc04g082030.1.1,Solyc05g054610.1.1,Solyc05g055230.1.1,Solyc06g073190.2.1,Solyc06g082590.1.1,Solyc06g082600.2.1,Solyc06g083790.2.1,Solyc07g007870.2.1,Solyc07g047850.2.1,Solyc07g049530.2.1,Solyc07g052480.2.1,Solyc09g010180.2.1,Solyc11g066130.1.1,Solyc12g098350.1.1	ACO1,CAB4,CHI3,CS1,FRK2,LOC543863,LOC543971,LOC544043,LOC544078,LOC544080,LOC544276,ODC,RPS17,Solyc01g091190.2.1,Solyc04g081320.2.1,UBC3,XTH1,ZE,infA,opr3,spy
GO.0044237	cellular metabolic process	20	9.2e-12	Solyc01g091190.2.1,Solyc01g096480.2.1,Solyc01g099630.2.1,Solyc02g082920.2.1,Solyc02g090890.2.1,Solyc04g049350.2.1,Solyc04g051860.2.1,Solyc04g081320.2.1,Solyc04g082030.1.1,Solyc05g055230.1.1,Solyc06g073190.2.1,Solyc06g082590.1.1,Solyc06g082600.2.1,Solyc06g083790.2.1,Solyc07g007870.2.1,Solyc07g047850.2.1,Solyc07g049530.2.1,Solyc07g052480.2.1,Solyc09g010180.2.1,Solyc12g098350.1.1	ACO1,CAB4,CHI3,CS1,FRK2,LOC543657,LOC543863,LOC544043,LOC544078,LOC544276,ODC,RPS17,Solyc01g091190.2.1,Solyc04g081320.2.1,UBC3,XTH1,ZE,infA,opr3,spy
GO.0071704	organic substance metabolic process	20	9.2e-12	Solyc01g091190.2.1,Solyc01g096480.2.1,Solyc01g099630.2.1,Solyc02g082920.2.1,Solyc02g090890.2.1,Solyc04g049350.2.1,Solyc04g051860.2.1,Solyc04g081320.2.1,Solyc04g082030.1.1,Solyc05g055230.1.1,Solyc06g073190.2.1,Solyc06g082590.1.1,Solyc06g082600.2.1,Solyc06g083790.2.1,Solyc07g007870.2.1,Solyc07g047850.2.1,Solyc07g049530.2.1,Solyc07g052480.2.1,Solyc09g010180.2.1,Solyc12g098350.1.1	ACO1,CAB4,CHI3,CS1,FRK2,LOC543657,LOC543863,LOC544043,LOC544078,LOC544276,ODC,RPS17,Solyc01g091190.2.1,Solyc04g081320.2.1,UBC3,XTH1,ZE,infA,opr3,spy
GO.0008150	biological_process	23	1.19e-11	Solyc01g091190.2.1,Solyc01g099630.2.1,Solyc02g082920.2.1,Solyc02g090890.2.1,Solyc04g049350.2.1,Solyc04g051860.2.1,Solyc04g081320.2.1,Solyc04g082010.1.1,Solyc04g082030.1.1,Solyc05g054610.1.1,Solyc05g055230.1.1,Solyc06g073190.2.1,Solyc06g082590.1.1,Solyc06g082600.2.1,Solyc06g083790.2.1,Solyc07g007870.2.1,Solyc07g047850.2.1,Solyc07g049530.2.1,Solyc07g052480.2.1,Solyc08g080650.1.1,Solyc09g010180.2.1,…	ACO1,CAB4,CHI3,CS1,FRK2,LOC543863,LOC543971,LOC544043,LOC544078,LOC544080,LOC544276,ODC,PETE,RPS17,Solyc01g091190.2.1,Solyc04g081320.2.1,TPM-1,UBC3,XTH1,ZE,infA,opr3,spy
GO.0008152	metabolic process	21	5.43e-11	Solyc01g091190.2.1,Solyc01g096480.2.1,Solyc01g099630.2.1,Solyc02g082920.2.1,Solyc02g090890.2.1,Solyc04g049350.2.1,Solyc04g051860.2.1,Solyc04g081320.2.1,Solyc04g082010.1.1,Solyc04g082030.1.1,Solyc05g055230.1.1,Solyc06g073190.2.1,Solyc06g082590.1.1,Solyc06g082600.2.1,Solyc06g083790.2.1,Solyc07g007870.2.1,Solyc07g047850.2.1,Solyc07g049530.2.1,Solyc07g052480.2.1,Solyc09g010180.2.1,Solyc12g098350.1.1	ACO1,CAB4,CHI3,CS1,FRK2,LOC543657,LOC543863,LOC544043,LOC544078,LOC544276,ODC,PETE,RPS17,Solyc01g091190.2.1,Solyc04g081320.2.1,UBC3,XTH1,ZE,infA,opr3,spy
GO.0006807	nitrogen compound metabolic process	13	8.02e-09	Solyc01g091190.2.1,Solyc01g096480.2.1,Solyc02g082920.2.1,Solyc02g083590.2.1,Solyc04g049350.2.1,Solyc04g051860.2.1,Solyc04g081320.2.1,Solyc04g082030.1.1,Solyc05g055230.1.1,Solyc06g082590.1.1,Solyc07g007870.2.1,Solyc09g010180.2.1,Solyc12g098350.1.1	CHI3,CS1,LOC543657,LOC544043,LOC544078,LOC544273,ODC,RPS17,Solyc01g091190.2.1,Solyc04g081320.2.1,infA,opr3,spy
GO.0044699	single-organism process	15	1.36e-08	Solyc01g091190.2.1,Solyc02g090890.2.1,Solyc04g049350.2.1,Solyc04g051860.2.1,Solyc04g081320.2.1,Solyc04g082010.1.1,Solyc04g082030.1.1,Solyc06g073190.2.1,Solyc06g083790.2.1,Solyc07g007870.2.1,Solyc07g049530.2.1,Solyc07g052480.2.1,Solyc09g010180.2.1,Solyc11g066130.1.1,Solyc12g098350.1.1	ACO1,CS1,FRK2,LOC543863,LOC543971,LOC544078,LOC544276,ODC,PETE,Solyc01g091190.2.1,Solyc04g081320.2.1,ZE,infA,opr3,spy
GO.0044710	single-organism metabolic process	14	1.41e-08	Solyc01g091190.2.1,Solyc01g096480.2.1,Solyc02g090890.2.1,Solyc04g049350.2.1,Solyc04g051860.2.1,Solyc04g081320.2.1,Solyc04g082010.1.1,Solyc04g082030.1.1,Solyc06g073190.2.1,Solyc06g083790.2.1,Solyc07g007870.2.1,Solyc07g049530.2.1,Solyc07g052480.2.1,Solyc09g010180.2.1	ACO1,CS1,FRK2,LOC543657,LOC543863,LOC544078,LOC544276,ODC,PETE,Solyc01g091190.2.1,Solyc04g081320.2.1,ZE,opr3,spy
GO.0044249	cellular biosynthetic process	13	1.69e-08	Solyc01g091190.2.1,Solyc01g096480.2.1,Solyc02g090890.2.1,Solyc04g049350.2.1,Solyc04g051860.2.1,Solyc04g082030.1.1,Solyc05g055230.1.1,Solyc06g073190.2.1,Solyc06g082590.1.1,Solyc07g007870.2.1,Solyc07g049530.2.1,Solyc09g010180.2.1,Solyc12g098350.1.1	ACO1,CS1,FRK2,LOC543657,LOC544043,LOC544078,ODC,RPS17,Solyc01g091190.2.1,ZE,infA,opr3,spy
GO.0019752	carboxylic acid metabolic process	9	2.54e-08	Solyc01g091190.2.1,Solyc02g083590.2.1,Solyc02g090890.2.1,Solyc04g049350.2.1,Solyc04g051860.2.1,Solyc04g082030.1.1,Solyc06g083790.2.1,Solyc07g007870.2.1,Solyc07g052480.2.1	CS1,LOC543863,LOC544078,LOC544273,LOC544276,ODC,Solyc01g091190.2.1,ZE,opr3
GO.0044763	single-organism cellular process	13	2.54e-08	Solyc01g091190.2.1,Solyc02g090890.2.1,Solyc04g049350.2.1,Solyc04g051860.2.1,Solyc04g081320.2.1,Solyc04g082030.1.1,Solyc06g073190.2.1,Solyc06g083790.2.1,Solyc07g007870.2.1,Solyc07g052480.2.1,Solyc09g010180.2.1,Solyc11g066130.1.1,Solyc12g098350.1.1	CS1,FRK2,LOC543863,LOC543971,LOC544078,LOC544276,ODC,Solyc01g091190.2.1,Solyc04g081320.2.1,ZE,infA,opr3,spy
GO.1901576	organic substance biosynthetic process	13	2.54e-08	Solyc01g091190.2.1,Solyc01g096480.2.1,Solyc02g090890.2.1,Solyc04g049350.2.1,Solyc04g051860.2.1,Solyc04g082030.1.1,Solyc05g055230.1.1,Solyc06g073190.2.1,Solyc06g082590.1.1,Solyc07g007870.2.1,Solyc07g049530.2.1,Solyc09g010180.2.1,Solyc12g098350.1.1	ACO1,CS1,FRK2,LOC543657,LOC544043,LOC544078,ODC,RPS17,Solyc01g091190.2.1,ZE,infA,opr3,spy
GO.0006725	cellular aromatic compound metabolic process	10	2.92e-08	Solyc01g091190.2.1,Solyc01g096480.2.1,Solyc02g083590.2.1,Solyc04g049350.2.1,Solyc04g051860.2.1,Solyc04g081320.2.1,Solyc06g082590.1.1,Solyc07g007870.2.1,Solyc09g010180.2.1,Solyc12g098350.1.1	CS1,LOC543657,LOC544043,LOC544078,LOC544273,Solyc01g091190.2.1,Solyc04g081320.2.1,infA,opr3,spy
GO.1901360	organic cyclic compound metabolic process	10	4.87e-08	Solyc01g091190.2.1,Solyc01g096480.2.1,Solyc02g083590.2.1,Solyc04g049350.2.1,Solyc04g051860.2.1,Solyc04g081320.2.1,Solyc06g082590.1.1,Solyc07g007870.2.1,Solyc09g010180.2.1,Solyc12g098350.1.1	CS1,LOC543657,LOC544043,LOC544078,LOC544273,Solyc01g091190.2.1,Solyc04g081320.2.1,infA,opr3,spy
GO.0044281	small molecule metabolic process	10	7.2e-08	Solyc01g091190.2.1,Solyc01g096480.2.1,Solyc02g090890.2.1,Solyc04g049350.2.1,Solyc04g051860.2.1,Solyc04g081320.2.1,Solyc04g082030.1.1,Solyc06g083790.2.1,Solyc07g007870.2.1,Solyc07g052480.2.1	CS1,LOC543657,LOC543863,LOC544078,LOC544276,ODC,Solyc01g091190.2.1,Solyc04g081320.2.1,ZE,opr3
GO.0044260	cellular macromolecule metabolic process	11	2.16e-07	Solyc01g096480.2.1,Solyc01g099630.2.1,Solyc02g082920.2.1,Solyc04g081320.2.1,Solyc05g055230.1.1,Solyc06g073190.2.1,Solyc06g082590.1.1,Solyc06g082600.2.1,Solyc07g047850.2.1,Solyc09g010180.2.1,Solyc12g098350.1.1	CAB4,CHI3,FRK2,LOC543657,LOC544043,RPS17,Solyc04g081320.2.1,UBC3,XTH1,infA,spy
GO.1901564	organonitrogen compound metabolic process	10	3.59e-07	Solyc01g091190.2.1,Solyc02g082920.2.1,Solyc02g083590.2.1,Solyc04g049350.2.1,Solyc04g051860.2.1,Solyc04g081320.2.1,Solyc04g082030.1.1,Solyc05g055230.1.1,Solyc07g007870.2.1,Solyc12g098350.1.1	CHI3,CS1,LOC544078,LOC544273,ODC,RPS17,Solyc01g091190.2.1,Solyc04g081320.2.1,infA,opr3
GO.0019438	aromatic compound biosynthetic process	8	4.9e-07	Solyc01g091190.2.1,Solyc01g096480.2.1,Solyc02g083590.2.1,Solyc04g049350.2.1,Solyc04g051860.2.1,Solyc06g082590.1.1,Solyc07g007870.2.1,Solyc12g098350.1.1	CS1,LOC543657,LOC544043,LOC544078,LOC544273,Solyc01g091190.2.1,infA,opr3
GO.0016043	cellular component organization	7	9.92e-07	Solyc01g096480.2.1,Solyc01g099630.2.1,Solyc04g081320.2.1,Solyc05g054610.1.1,Solyc09g010180.2.1,Solyc11g066130.1.1,Solyc12g098350.1.1	LOC543657,LOC543971,LOC544080,Solyc04g081320.2.1,XTH1,infA,spy
GO.1901362	organic cyclic compound biosynthetic process	8	9.92e-07	Solyc01g091190.2.1,Solyc01g096480.2.1,Solyc02g083590.2.1,Solyc04g049350.2.1,Solyc04g051860.2.1,Solyc06g082590.1.1,Solyc07g007870.2.1,Solyc12g098350.1.1	CS1,LOC543657,LOC544043,LOC544078,LOC544273,Solyc01g091190.2.1,infA,opr3
GO.0009072	aromatic amino acid family metabolic process	5	2.39e-06	Solyc01g091190.2.1,Solyc02g083590.2.1,Solyc04g049350.2.1,Solyc04g051860.2.1,Solyc07g007870.2.1	CS1,LOC544078,LOC544273,Solyc01g091190.2.1,opr3
GO.0043648	dicarboxylic acid metabolic process	5	3.72e-06	Solyc01g091190.2.1,Solyc02g083590.2.1,Solyc04g049350.2.1,Solyc04g051860.2.1,Solyc06g083790.2.1	CS1,LOC543863,LOC544078,LOC544273,Solyc01g091190.2.1
GO.0006520	cellular amino acid metabolic process	6	4.19e-06	Solyc01g091190.2.1,Solyc02g083590.2.1,Solyc04g049350.2.1,Solyc04g051860.2.1,Solyc04g082030.1.1,Solyc07g007870.2.1	CS1,LOC544078,LOC544273,ODC,Solyc01g091190.2.1,opr3
GO.0046394	carboxylic acid biosynthetic process	6	6.45e-06	Solyc01g091190.2.1,Solyc02g083590.2.1,Solyc02g090890.2.1,Solyc04g049350.2.1,Solyc04g051860.2.1,Solyc07g007870.2.1	CS1,LOC544078,LOC544273,Solyc01g091190.2.1,ZE,opr3
GO.0006996	organelle organization	5	7.48e-06	Solyc01g096480.2.1,Solyc04g081320.2.1,Solyc05g054610.1.1,Solyc09g010180.2.1,Solyc12g098350.1.1	LOC543657,LOC544080,Solyc04g081320.2.1,infA,spy
GO.1901566	organonitrogen compound biosynthetic process	8	8.27e-06	Solyc01g091190.2.1,Solyc02g083590.2.1,Solyc04g049350.2.1,Solyc04g051860.2.1,Solyc04g082030.1.1,Solyc05g055230.1.1,Solyc07g007870.2.1,Solyc12g098350.1.1	CS1,LOC544078,LOC544273,ODC,RPS17,Solyc01g091190.2.1,infA,opr3
GO.0009423	chorismate biosynthetic process	4	9.34e-06	Solyc01g091190.2.1,Solyc02g083590.2.1,Solyc04g049350.2.1,Solyc04g051860.2.1	CS1,LOC544078,LOC544273,Solyc01g091190.2.1
GO.0044711	single-organism biosynthetic process	8	1.53e-05	Solyc01g091190.2.1,Solyc01g096480.2.1,Solyc02g090890.2.1,Solyc04g049350.2.1,Solyc04g051860.2.1,Solyc04g082030.1.1,Solyc06g073190.2.1,Solyc07g007870.2.1	CS1,FRK2,LOC543657,LOC544078,ODC,Solyc01g091190.2.1,ZE,opr3
GO.0009073	aromatic amino acid family biosynthetic process	4	1.66e-05	Solyc01g091190.2.1,Solyc02g083590.2.1,Solyc04g049350.2.1,Solyc04g051860.2.1	CS1,LOC544078,LOC544273,Solyc01g091190.2.1
GO.0034641	cellular nitrogen compound metabolic process	8	7.5e-05	Solyc01g096480.2.1,Solyc04g081320.2.1,Solyc04g082030.1.1,Solyc05g055230.1.1,Solyc06g082590.1.1,Solyc07g007870.2.1,Solyc09g010180.2.1,Solyc12g098350.1.1	LOC543657,LOC544043,ODC,RPS17,Solyc04g081320.2.1,infA,opr3,spy
GO.0016070	RNA metabolic process	5	0.000147	Solyc01g096480.2.1,Solyc04g081320.2.1,Solyc06g082590.1.1,Solyc09g010180.2.1,Solyc12g098350.1.1	LOC543657,LOC544043,Solyc04g081320.2.1,infA,spy
GO.0055114	oxidation-reduction process	7	0.000188	Solyc01g096480.2.1,Solyc02g090890.2.1,Solyc04g082010.1.1,Solyc06g083790.2.1,Solyc07g007870.2.1,Solyc07g049530.2.1,Solyc07g052480.2.1	ACO1,LOC543657,LOC543863,LOC544276,PETE,ZE,opr3
GO.0010467	gene expression	6	0.000235	Solyc01g096480.2.1,Solyc04g081320.2.1,Solyc05g055230.1.1,Solyc06g082590.1.1,Solyc09g010180.2.1,Solyc12g098350.1.1	LOC543657,LOC544043,RPS17,Solyc04g081320.2.1,infA,spy
GO.0044283	small molecule biosynthetic process	5	0.000272	Solyc01g091190.2.1,Solyc02g090890.2.1,Solyc04g049350.2.1,Solyc04g051860.2.1,Solyc07g007870.2.1	CS1,LOC544078,Solyc01g091190.2.1,ZE,opr3
GO.0034645	cellular macromolecule biosynthetic process	6	0.00028	Solyc01g096480.2.1,Solyc05g055230.1.1,Solyc06g073190.2.1,Solyc06g082590.1.1,Solyc09g010180.2.1,Solyc12g098350.1.1	FRK2,LOC543657,LOC544043,RPS17,infA,spy
GO.0006396	RNA processing	3	0.00039	Solyc01g096480.2.1,Solyc04g081320.2.1,Solyc09g010180.2.1	LOC543657,Solyc04g081320.2.1,spy
GO.0009657	plastid organization	3	0.00039	Solyc01g096480.2.1,Solyc04g081320.2.1,Solyc12g098350.1.1	LOC543657,Solyc04g081320.2.1,infA
GO.0046483	heterocycle metabolic process	6	0.00039	Solyc01g096480.2.1,Solyc04g081320.2.1,Solyc06g082590.1.1,Solyc07g007870.2.1,Solyc09g010180.2.1,Solyc12g098350.1.1	LOC543657,LOC544043,Solyc04g081320.2.1,infA,opr3,spy
GO.0050896	response to stimulus	6	0.000511	Solyc01g096480.2.1,Solyc02g082920.2.1,Solyc06g082590.1.1,Solyc07g007870.2.1,Solyc08g080650.1.1,Solyc09g010180.2.1	CHI3,LOC543657,LOC544043,TPM-1,opr3,spy
GO.0005975	carbohydrate metabolic process	5	0.00106	Solyc01g099630.2.1,Solyc02g082920.2.1,Solyc06g073190.2.1,Solyc07g052480.2.1,Solyc09g010180.2.1	CHI3,FRK2,LOC544276,XTH1,spy
GO.0006952	defense response	4	0.00132	Solyc01g096480.2.1,Solyc02g082920.2.1,Solyc06g082590.1.1,Solyc08g080650.1.1	CHI3,LOC543657,LOC544043,TPM-1
GO.0032787	monocarboxylic acid metabolic process	4	0.00132	Solyc02g083590.2.1,Solyc02g090890.2.1,Solyc07g007870.2.1,Solyc07g052480.2.1	LOC544273,LOC544276,ZE,opr3
GO.0044271	cellular nitrogen compound biosynthetic process	6	0.00145	Solyc01g096480.2.1,Solyc04g082030.1.1,Solyc05g055230.1.1,Solyc06g082590.1.1,Solyc07g007870.2.1,Solyc12g098350.1.1	LOC543657,LOC544043,ODC,RPS17,infA,opr3
GO.0044267	cellular protein metabolic process	6	0.00154	Solyc04g081320.2.1,Solyc05g055230.1.1,Solyc06g082600.2.1,Solyc07g047850.2.1,Solyc09g010180.2.1,Solyc12g098350.1.1	CAB4,RPS17,Solyc04g081320.2.1,UBC3,infA,spy
GO.0006950	response to stress	5	0.00205	Solyc01g096480.2.1,Solyc02g082920.2.1,Solyc06g082590.1.1,Solyc07g007870.2.1,Solyc08g080650.1.1	CHI3,LOC543657,LOC544043,TPM-1,opr3
GO.0044085	cellular component biogenesis	3	0.00255	Solyc01g096480.2.1,Solyc04g081320.2.1,Solyc05g054610.1.1	LOC543657,LOC544080,Solyc04g081320.2.1
GO.0044262	cellular carbohydrate metabolic process	3	0.00255	Solyc01g099630.2.1,Solyc06g073190.2.1,Solyc07g052480.2.1	FRK2,LOC544276,XTH1
GO.0065008	regulation of biological quality	3	0.00255	Solyc01g096480.2.1,Solyc07g007870.2.1,Solyc08g080650.1.1	LOC543657,TPM-1,opr3
GO.0043933	macromolecular complex subunit organization	3	0.00322	Solyc04g081320.2.1,Solyc05g054610.1.1,Solyc09g010180.2.1	LOC544080,Solyc04g081320.2.1,spy
GO.0060255	regulation of macromolecule metabolic process	4	0.00322	Solyc01g096480.2.1,Solyc04g081320.2.1,Solyc06g082590.1.1,Solyc09g010180.2.1	LOC543657,LOC544043,Solyc04g081320.2.1,spy
GO.0080090	regulation of primary metabolic process	4	0.00322	Solyc01g096480.2.1,Solyc04g081320.2.1,Solyc06g082590.1.1,Solyc09g010180.2.1	LOC543657,LOC544043,Solyc04g081320.2.1,spy
GO.0065007	biological regulation	5	0.00337	Solyc04g081320.2.1,Solyc06g082590.1.1,Solyc07g007870.2.1,Solyc08g080650.1.1,Solyc09g010180.2.1	LOC544043,Solyc04g081320.2.1,TPM-1,opr3,spy
GO.0031323	regulation of cellular metabolic process	4	0.00356	Solyc01g096480.2.1,Solyc04g081320.2.1,Solyc06g082590.1.1,Solyc09g010180.2.1	LOC543657,LOC544043,Solyc04g081320.2.1,spy
GO.0000278	mitotic cell cycle	2	0.00454	Solyc09g010180.2.1,Solyc11g066130.1.1	LOC543971,spy
GO.0006364	rRNA processing	2	0.00454	Solyc01g096480.2.1,Solyc04g081320.2.1	LOC543657,Solyc04g081320.2.1
GO.0005976	polysaccharide metabolic process	3	0.00665	Solyc01g099630.2.1,Solyc02g082920.2.1,Solyc06g073190.2.1	CHI3,FRK2,XTH1
GO.0006073	cellular glucan metabolic process	2	0.00665	Solyc01g099630.2.1,Solyc06g073190.2.1	FRK2,XTH1
GO.0006099	tricarboxylic acid cycle	2	0.00665	Solyc06g083790.2.1,Solyc07g052480.2.1	LOC543863,LOC544276
GO.0006732	coenzyme metabolic process	3	0.00665	Solyc02g083590.2.1,Solyc04g081320.2.1,Solyc06g083790.2.1	LOC543863,LOC544273,Solyc04g081320.2.1
GO.0009060	aerobic respiration	2	0.00665	Solyc06g083790.2.1,Solyc07g052480.2.1	LOC543863,LOC544276
GO.0042254	ribosome biogenesis	2	0.00665	Solyc01g096480.2.1,Solyc04g081320.2.1	LOC543657,Solyc04g081320.2.1
GO.0044248	cellular catabolic process	3	0.00665	Solyc02g082920.2.1,Solyc07g007870.2.1,Solyc09g010180.2.1	CHI3,opr3,spy
GO.0044270	cellular nitrogen compound catabolic process	2	0.00665	Solyc07g007870.2.1,Solyc09g010180.2.1	opr3,spy
GO.0045893	positive regulation of transcription, DNA-templated	2	0.00665	Solyc01g096480.2.1,Solyc09g010180.2.1	LOC543657,spy
GO.0046700	heterocycle catabolic process	2	0.00665	Solyc07g007870.2.1,Solyc09g010180.2.1	opr3,spy
GO.0071554	cell wall organization or biogenesis	3	0.00665	Solyc01g099630.2.1,Solyc02g082920.2.1,Solyc11g066130.1.1	CHI3,LOC543971,XTH1
GO.0072330	monocarboxylic acid biosynthetic process	3	0.00665	Solyc02g083590.2.1,Solyc02g090890.2.1,Solyc07g007870.2.1	LOC544273,ZE,opr3
GO.1902589	single-organism organelle organization	2	0.00665	Solyc01g096480.2.1,Solyc09g010180.2.1	LOC543657,spy
GO.0018130	heterocycle biosynthetic process	4	0.00676	Solyc01g096480.2.1,Solyc06g082590.1.1,Solyc07g007870.2.1,Solyc12g098350.1.1	LOC543657,LOC544043,infA,opr3
GO.0006355	regulation of transcription, DNA-templated	3	0.00732	Solyc01g096480.2.1,Solyc06g082590.1.1,Solyc09g010180.2.1	LOC543657,LOC544043,spy
GO.0006091	generation of precursor metabolites and energy	4	0.0076	Solyc04g081320.2.1,Solyc06g083790.2.1,Solyc07g047850.2.1,Solyc07g052480.2.1	CAB4,LOC543863,LOC544276,Solyc04g081320.2.1
GO.0006793	phosphorus metabolic process	4	0.0076	Solyc04g051860.2.1,Solyc04g081320.2.1,Solyc06g073190.2.1,Solyc06g083790.2.1	FRK2,LOC543863,LOC544078,Solyc04g081320.2.1
GO.0050794	regulation of cellular process	4	0.0076	Solyc04g081320.2.1,Solyc06g082590.1.1,Solyc07g007870.2.1,Solyc09g010180.2.1	LOC544043,Solyc04g081320.2.1,opr3,spy
GO.0006351	transcription, DNA-templated	3	0.00806	Solyc01g096480.2.1,Solyc06g082590.1.1,Solyc12g098350.1.1	LOC543657,LOC544043,infA
GO.0006081	cellular aldehyde metabolic process	2	0.00934	Solyc04g081320.2.1,Solyc07g052480.2.1	LOC544276,Solyc04g081320.2.1
GO.0006733	oxidoreduction coenzyme metabolic process	2	0.00934	Solyc02g083590.2.1,Solyc04g081320.2.1	LOC544273,Solyc04g081320.2.1
GO.0048585	negative regulation of response to stimulus	2	0.00934	Solyc01g096480.2.1,Solyc09g010180.2.1	LOC543657,spy
GO.0044723	single-organism carbohydrate metabolic process	3	0.0119	Solyc06g073190.2.1,Solyc07g052480.2.1,Solyc09g010180.2.1	FRK2,LOC544276,spy
GO.0019439	aromatic compound catabolic process	2	0.0127	Solyc07g007870.2.1,Solyc09g010180.2.1	opr3,spy
GO.0071396	cellular response to lipid	2	0.0127	Solyc07g007870.2.1,Solyc09g010180.2.1	opr3,spy
GO.1901361	organic cyclic compound catabolic process	2	0.0127	Solyc07g007870.2.1,Solyc09g010180.2.1	opr3,spy
GO.1901575	organic substance catabolic process	3	0.0139	Solyc02g082920.2.1,Solyc07g007870.2.1,Solyc09g010180.2.1	CHI3,opr3,spy
GO.0006325	chromatin organization	2	0.0163	Solyc05g054610.1.1,Solyc09g010180.2.1	LOC544080,spy
GO.0006461	protein complex assembly	2	0.0163	Solyc04g081320.2.1,Solyc05g054610.1.1	LOC544080,Solyc04g081320.2.1
GO.0006576	cellular biogenic amine metabolic process	2	0.0163	Solyc04g082030.1.1,Solyc07g007870.2.1	ODC,opr3
GO.0070271	protein complex biogenesis	2	0.0163	Solyc04g081320.2.1,Solyc05g054610.1.1	LOC544080,Solyc04g081320.2.1
GO.0071229	cellular response to acid chemical	2	0.0163	Solyc07g007870.2.1,Solyc09g010180.2.1	opr3,spy
GO.0034622	cellular macromolecular complex assembly	2	0.0198	Solyc04g081320.2.1,Solyc05g054610.1.1	LOC544080,Solyc04g081320.2.1
GO.0051276	chromosome organization	2	0.0198	Solyc05g054610.1.1,Solyc09g010180.2.1	LOC544080,spy
GO.1901135	carbohydrate derivative metabolic process	3	0.0229	Solyc02g082920.2.1,Solyc04g081320.2.1,Solyc09g010180.2.1	CHI3,Solyc04g081320.2.1,spy
GO.1901617	organic hydroxy compound biosynthetic process	2	0.0242	Solyc02g083590.2.1,Solyc02g090890.2.1	LOC544273,ZE
GO.0009755	hormone-mediated signaling pathway	2	0.028	Solyc07g007870.2.1,Solyc09g010180.2.1	opr3,spy
GO.0032870	cellular response to hormone stimulus	2	0.028	Solyc07g007870.2.1,Solyc09g010180.2.1	opr3,spy
GO.1901565	organonitrogen compound catabolic process	2	0.028	Solyc02g082920.2.1,Solyc07g007870.2.1	CHI3,opr3
GO.1901701	cellular response to oxygen-containing compound	2	0.028	Solyc07g007870.2.1,Solyc09g010180.2.1	opr3,spy
GO.0048523	negative regulation of cellular process	2	0.0334	Solyc01g096480.2.1,Solyc09g010180.2.1	LOC543657,spy
GO.0009607	response to biotic stimulus	2	0.0393	Solyc02g082920.2.1,Solyc08g080650.1.1	CHI3,TPM-1
GO.0006796	phosphate-containing compound metabolic process	3	0.0419	Solyc04g051860.2.1,Solyc04g081320.2.1,Solyc06g073190.2.1	FRK2,LOC544078,Solyc04g081320.2.1
GO.0071555	cell wall organization	2	0.0451	Solyc01g099630.2.1,Solyc11g066130.1.1	LOC543971,XTH1
GO.0006464	cellular protein modification process	3	0.0468	Solyc06g082600.2.1,Solyc07g047850.2.1,Solyc09g010180.2.1	CAB4,UBC3,spy

[truncated: 4 more sheets: S 8, S 9, S 10, S 11]
